# Supplementary material for: Proteome allocations change linearly with the specific growth rate of Saccharomyces cerevisiae under glucose limitation
Source: Nat Commun. 2022 May 20;13:2819. doi: 10.1038/s41467-022-30513-2 (PMC9122918; doi:10.1038/s41467-022-30513-2)
Supplement: Supplementary file 5 — Supplementary Data 2 [file 41467_2022_30513_MOESM5_ESM.xlsx]

## Sheet: Translation
ORF	gene
YMR116C	ASC1
YOR276W	CAF20
YPL048W	CAM1
YLR175W	CBF5
YOL139C	CDC33
YAL003W	EFB1
YOR133W	EFT1
YPL037C	EGD1
YHR193C	EGD2
YBR101C	FES1
YAL035W	FUN12
YHR089C	GAR1
YOR260W	GCD1
YER025W	GCD11
YGR083C	GCD2
YDR211W	GCD6
YLR291C	GCD7
YGL195W	GCN1
YFR009W	GCN20
YBR121C	GRS1
YNL014W	HEF3
YEL034W	HYP2
YLR244C	MAP1
YKL009W	MRT4
YPL211W	NIP7
YHR170W	NMD3
YLR197W	NOP56
YOR310C	NOP58
YBR079C	RPG1
YLR075W	RPL10
YPR102C	RPL11A
YGR085C	RPL11B
YEL054C	RPL12A
YDR418W	RPL12B
YDL082W	RPL13A
YMR142C	RPL13B
YKL006W	RPL14A
YHL001W	RPL14B
YLR029C	RPL15A
YIL133C	RPL16A
YNL069C	RPL16B
YKL180W	RPL17A
YJL177W	RPL17B
YOL120C	RPL18A
YNL301C	RPL18B
YBR084C-A	RPL19A
YBL027W	RPL19B
YPL220W	RPL1A
YGL135W	RPL1B
YMR242C	RPL20A
YOR312C	RPL20B
YBR191W	RPL21A
YPL079W	RPL21B
YLR061W	RPL22A
YBL087C	RPL23A
YER117W	RPL23B
YGL031C	RPL24A
YGR148C	RPL24B
YOL127W	RPL25
YLR344W	RPL26A
YGR034W	RPL26B
YHR010W	RPL27A
YDR471W	RPL27B
YGL103W	RPL28
YFR031C-A	RPL2A
YIL018W	RPL2B
YOR063W	RPL3
YGL030W	RPL30
YDL075W	RPL31A
YLR406C	RPL31B
YBL092W	RPL32
YPL143W	RPL33A
YOR234C	RPL33B
YER056C-A	RPL34A
YIL052C	RPL34B
YDL191W	RPL35A
YDL136W	RPL35B
YMR194W	RPL36A
YLR185W	RPL37A
YDR500C	RPL37B
YLR325C	RPL38
YJL189W	RPL39
YNL162W	RPL42A
YHR141C	RPL42B
YPR043W	RPL43A
YJR094W-A	RPL43B
YBR031W	RPL4A
YDR012W	RPL4B
YPL131W	RPL5
YML073C	RPL6A
YLR448W	RPL6B
YGL076C	RPL7A
YPL198W	RPL7B
YHL033C	RPL8A
YLL045C	RPL8B
YGL147C	RPL9A
YNL067W	RPL9B
YLR340W	RPP0
YDL081C	RPP1A
YDL130W	RPP1B
YOL039W	RPP2A
YDR382W	RPP2B
YGR214W	RPS0A
YLR048W	RPS0B
YDR025W	RPS11A
YBR048W	RPS11B
YOR369C	RPS12
YDR064W	RPS13
YCR031C	RPS14A
YJL191W	RPS14B
YOL040C	RPS15
YMR143W	RPS16A
YDL083C	RPS16B
YDR450W	RPS18A
YML026C	RPS18B
YOL121C	RPS19A
YNL302C	RPS19B
YLR441C	RPS1A
YML063W	RPS1B
YGL123W	RPS2
YHL015W	RPS20
YKR057W	RPS21A
YJL136C	RPS21B
YJL190C	RPS22A
YLR367W	RPS22B
YGR118W	RPS23A
YPR132W	RPS23B
YER074W	RPS24A
YIL069C	RPS24B
YLR333C	RPS25B
YGL189C	RPS26A
YER131W	RPS26B
YKL156W	RPS27A
YHR021C	RPS27B
YOR167C	RPS28A
YLR264W	RPS28B
YLR388W	RPS29A
YDL061C	RPS29B
YNL178W	RPS3
YLR287C-A	RPS30A
YOR182C	RPS30B
YLR167W	RPS31
YJR145C	RPS4A
YHR203C	RPS4B
YJR123W	RPS5
YPL090C	RPS6A
YBR181C	RPS6B
YOR096W	RPS7A
YNL096C	RPS7B
YBL072C	RPS8A
YER102W	RPS8B
YPL081W	RPS9A
YBR189W	RPS9B
YPL012W	RRP12
YDR023W	SES1
YEL026W	SNU13
YIR012W	SQT1
YHR064C	SSZ1
YLR150W	STM1
YNL244C	SUI1
YJR007W	SUI2
YPL237W	SUI3
YPR080W	TEF1
YKL081W	TEF4
YKR059W	TIF1
YMR260C	TIF11
YPR163C	TIF3
YGR162W	TIF4631
YGL049C	TIF4632
YPR041W	TIF5
YKL056C	TMA19
YOL097C	WRS1
YLR249W	YEF3
YGR054W	YGR054W
Not in data
YJR047C	ANB1
YDR252W	BTT1
YDR385W	EFT2
YDR283C	GCN2
YIL148W	RPL40A
YKR094C	RPL40B
YDL184C	RPL41A
YDL133C-A	RPL41B
YOR293W	RPS10A
YMR230W	RPS10B
YML024W	RPS17A
YDR447C	RPS17B
YGR027C	RPS25A
YBR118W	TEF2
YJL138C	TIF2
YDR417C	YDR417C
YOR309C	YOR309C

## Sheet: Glycoslysis
ORF	gene
YBR196C	PGI1
YGR240C	PFK1
YMR205C	PFK2
YKL060C	FBA1
YJL052W	TDH1
YJR009C	TDH2
YGR192C	TDH3
YCR012W	PGK1
YKL152C	GPM1
YGR254W	ENO1
YHR174W	ENO2
YAL038W	CDC19
YOR347C	PYK2

## Sheet: Mitochondira
ORF	gene
YAL019W	FUN30
YAL029C	MYO4
YAL044C	GCV3
YBL015W	ACH1
YBL022C	PIM1
YBL030C	PET9
YBL045C	COR1
YBL057C	PTH2
YBL064C	PRX1
YBL098W	BNA4
YBL099W	ATP1
YBR039W	ATP3
YBR084W	MIS1
YBR146W	MRPS9
YBR177C	EHT1
YBR221C	PDB1
YBR227C	MCX1
YBR291C	CTP1
YCL017C	NFS1
YCL044C	MGR1
YCL057W	PRD1
YCR004C	YCP4
YDL004W	ATP16
YDL029W	ARP2
YDL040C	NAT1
YDL067C	COX9
YDL086W	YDL086W
YDL120W	YFH1
YDL148C	NOP14
YDL174C	DLD1
YDL178W	DLD2
YDL198C	GGC1
YDL202W	MRPL11
YDR011W	SNQ2
YDR019C	GCV1
YDR032C	PST2
YDR036C	EHD3
YDR061W	YDR061W
YDR116C	MRPL1
YDR120C	TRM1
YDR141C	DOP1
YDR148C	KGD2
YDR194C	MSS116
YDR232W	HEM1
YDR298C	ATP5
YDR341C	YDR341C
YDR347W	MRP1
YDR377W	ATP17
YDR430C	CYM1
YDR487C	RIB3
YDR505C	PSP1
YDR529C	QCR7
YEL024W	RIP1
YEL047C	YEL047C
YER020W	GPA2
YER080W	AIM9
YER125W	RSP5
YER155C	BEM2
YER168C	CCA1
YER178W	PDA1
YER182W	FMP10
YFL010C	WWM1
YFL018C	LPD1
YFR033C	QCR6
YFR044C	DUG1
YGL008C	PMA1
YGL011C	SCL1
YGL068W	MNP1
YGL107C	RMD9
YGL119W	COQ8
YGL120C	PRP43
YGL125W	MET13
YGL187C	COX4
YGL191W	COX13
YGL221C	NIF3
YGR029W	ERV1
YGR033C	TIM21
YGR082W	TOM20
YGR094W	VAS1
YGR132C	PHB1
YGR159C	NSR1
YGR165W	MRPS35
YGR178C	PBP1
YGR181W	TIM13
YGR193C	PDX1
YGR207C	YGR207C
YGR220C	MRPL9
YGR231C	PHB2
YGR244C	LSC2
YGR266W	YGR266W
YGR286C	BIO2
YHL004W	MRP4
YHL021C	AIM17
YHR003C	YHR003C
YHR008C	SOD2
YHR024C	MAS2
YHR037W	PUT2
YHR051W	COX6
YHR076W	PTC7
YHR117W	TOM71
YHR179W	OYE2
YHR183W	GND1
YIL022W	TIM44
YIL043C	CBR1
YIL051C	MMF1
YIL065C	FIS1
YIL078W	THS1
YIL105C	SLM1
YIL125W	KGD1
YIL136W	OM45
YJL054W	TIM54
YJL060W	BNA3
YJL082W	IML2
YJL096W	MRPL49
YJL098W	SAP185
YJL104W	PAM16
YJL180C	ATP12
YJR003C	YJR003C
YJR048W	CYC1
YJR077C	MIR1
YJR080C	AIM24
YJR104C	SOD1
YJR121W	ATP2
YKL010C	UFD4
YKL016C	ATP7
YKL027W	YKL027W
YKL040C	NFU1
YKL085W	MDH1
YKL120W	OAC1
YKL148C	SDH1
YKL157W	APE2
YKL192C	ACP1
YKL195W	MIA40
YKL196C	YKT6
YKR006C	MRPL13
YKR016W	FCJ1
YKR049C	FMP46
YKR070W	YKR070W
YLL001W	DNM1
YLL036C	PRP19
YLL040C	VPS13
YLL041C	SDH2
YLR038C	COX12
YLR059C	REX2
YLR106C	MDN1
YLR163C	MAS1
YLR201C	COQ9
YLR203C	MSS51
YLR270W	DCS1
YLR290C	YLR290C
YLR312W-A	MRPL15
YLR335W	NUP2
YLR342W	FKS1
YLR348C	DIC1
YLR351C	NIT3
YLR380W	CSR1
YML025C	YML6
YML052W	SUR7
YML078W	CPR3
YML110C	COQ5
YML120C	NDI1
YML129C	COX14
YMR038C	CCS1
YMR072W	ABF2
YMR089C	YTA12
YMR128W	ECM16
YMR129W	POM152
YMR145C	NDE1
YMR158W	MRPS8
YMR188C	MRPS17
YMR189W	GCV2
YMR203W	TOM40
YMR241W	YHM2
YMR302C	YME2
YMR307W	GAS1
YNL052W	COX5A
YNL055C	POR1
YNL071W	LAT1
YNL088W	TOP2
YNL112W	DBP2
YNL121C	TOM70
YNL131W	TOM22
YNL168C	FMP41
YNL185C	MRPL19
YNL208W	YNL208W
YNL239W	LAP3
YNL256W	FOL1
YNL274C	GOR1
YNL292W	PUS4
YNL315C	ATP11
YNR017W	TIM23
YNR018W	AIM38
YOL021C	DIS3
YOL027C	MDM38
YOL109W	ZEO1
YOR065W	CYT1
YOR089C	VPS21
YOR142W	LSC1
YOR153W	PDR5
YOR176W	HEM15
YOR187W	TUF1
YOR206W	NOC2
YOR211C	MGM1
YOR215C	AIM41
YOR222W	ODC2
YOR232W	MGE1
YOR271C	FSF1
YOR286W	RDL2
YOR335C	ALA1
YOR354C	MSC6
YOR356W	YOR356W
YPL063W	TIM50
YPL078C	ATP4
YPL118W	MRP51
YPL135W	ISU1
YPL173W	MRPL40
YPL215W	CBP3
YPL217C	BMS1
YPL226W	NEW1
YPL262W	FUM1
YPL270W	MDL2
YPL271W	ATP15
YPR002W	PDH1
YPR004C	AIM45
YPR020W	ATP20
YPR024W	YME1
YPR058W	YMC1
YPR097W	YPR097W
YPR191W	QCR2
YAL039C	CYC3
YAL054C	ACS1
YAR008W	SEN34
YAR035W	YAT1
YBL016W	FUS3
YBL038W	MRPL16
YBL059W	YBL059W
YBL080C	PET112
YBL090W	MRP21
YBL095W	YBL095W
YBR003W	COQ1
YBR024W	SCO2
YBR037C	SCO1
YBR044C	TCM62
YBR081C	SPT7
YBR091C	TIM12
YBR120C	CBP6
YBR122C	MRPL36
YBR129C	OPY1
YBR176W	ECM31
YBR179C	FZO1
YBR185C	MBA1
YBR192W	RIM2
YBR230C	OM14
YBR251W	MRPS5
YBR262C	AIM5
YBR268W	MRPL37
YBR282W	MRPL27
YCR010C	ADY2
YCR024C	SLM5
YCR046C	IMG1
YCR071C	IMG2
YDL044C	MTF2
YDL085W	NDE2
YDL107W	MSS2
YDL157C	YDL157C
YDL181W	INH1
YDL217C	TIM22
YDL230W	PTP1
YDR041W	RSM10
YDR079W	PET100
YDR115W	YDR115W
YDR175C	RSM24
YDR178W	SDH4
YDR197W	CBS2
YDR204W	COQ4
YDR231C	COX20
YDR236C	FMN1
YDR237W	MRPL7
YDR268W	MSW1
YDR301W	CFT1
YDR316W	OMS1
YDR322W	MRPL35
YDR337W	MRPS28
YDR375C	BCS1
YDR376W	ARH1
YDR405W	MRP20
YDR462W	MRPL28
YDR493W	MZM1
YDR511W	ACN9
YEL039C	CYC7
YEL050C	RML2
YEL052W	AFG1
YER014W	HEM14
YER017C	AFG3
YER050C	RSM18
YER053C	PIC2
YER058W	PET117
YER077C	YER077C
YER078C	ICP55
YER154W	OXA1
YER183C	FAU1
YFL030W	AGX1
YFR011C	AIM13
YFR015C	GSY1
YFR049W	YMR31
YGL023C	PIB2
YGL057C	GEP7
YGL059W	PKP2
YGL064C	MRH4
YGL080W	FMP37
YGL129C	RSM23
YGL143C	MRF1
YGL197W	MDS3
YGL211W	NCS6
YGL226W	MTC3
YGL236C	MTO1
YGR021W	YGR021W
YGR028W	MSP1
YGR031W	YGR031W
YGR049W	SCM4
YGR076C	MRPL25
YGR084C	MRP13
YGR102C	YGR102C
YGR112W	SHY1
YGR147C	NAT2
YGR150C	CCM1
YGR171C	MSM1
YGR174C	CBP4
YGR183C	QCR9
YGR215W	RSM27
YGR235C	YGR235C
YGR243W	FMP43
YGR257C	MTM1
YGR287C	IMA1
YHL014C	YLF2
YHL018W	YHL018W
YHL038C	CBP2
YHR011W	DIA4
YHR038W	RRF1
YHR059W	FYV4
YHR083W	SAM35
YHR091C	MSR1
YHR116W	COX23
YHR147C	MRPL6
YHR171W	ATG7
YHR198C	AIM18
YHR199C	AIM46
YIL042C	PKP1
YIL062C	ARC15
YIL070C	MAM33
YIL093C	RSM25
YIL098C	FMC1
YIL129C	TAO3
YIL149C	MLP2
YIL157C	COA1
YIL162W	SUC2
YIR021W	MRS1
YIR024C	YIR024C
YJL045W	YJL045W
YJL063C	MRPL8
YJL066C	MPM1
YJL112W	MDV1
YJL131C	AIM23
YJL143W	TIM17
YJL166W	QCR8
YJL208C	NUC1
YJR034W	PET191
YJR085C	YJR085C
YJR095W	SFC1
YJR101W	RSM26
YJR113C	RSM7
YJR122W	IBA57
YKL003C	MRP17
YKL087C	CYT2
YKL134C	OCT1
YKL138C	MRPL31
YKL141W	SDH3
YKL155C	RSM22
YKL167C	MRP49
YKL170W	MRPL38
YKL194C	MST1
YKL203C	TOR2
YKL217W	JEN1
YKR023W	YKR023W
YKR036C	CAF4
YKR042W	UTH1
YKR065C	PAM17
YKR079C	TRZ1
YKR085C	MRPL20
YLL027W	ISA1
YLR008C	PAM18
YLR069C	MEF1
YLR077W	FMP25
YLR090W	XDJ1
YLR132C	YLR132C
YLR139C	SLS1
YLR193C	UPS1
YLR239C	LIP2
YLR253W	YLR253W
YLR289W	GUF1
YLR295C	ATP14
YLR382C	NAM2
YLR393W	ATP10
YLR395C	COX8
YLR419W	YLR419W
YLR439W	MRPL4
YML030W	AIM31
YML042W	CAT2
YML054C	CYB2
YML091C	RPM2
YMR024W	MRPL3
YMR031C	YMR031C
YMR056C	AAC1
YMR061W	RNA14
YMR097C	MTG1
YMR098C	ATP25
YMR115W	MGR3
YMR157C	AIM36
YMR167W	MLH1
YMR192W	GYL1
YMR193W	MRPL24
YMR211W	DML1
YMR212C	EFR3
YMR225C	MRPL44
YMR267W	PPA2
YMR282C	AEP2
YMR293C	HER2
YNL005C	MRP7
YNL026W	SAM50
YNL066W	SUN4
YNL073W	MSK1
YNL081C	SWS2
YNL083W	SAL1
YNL100W	AIM37
YNL122C	YNL122C
YNL137C	NAM9
YNL177C	MRPL22
YNL195C	YNL195C
YNL200C	YNL200C
YNL227C	JJJ1
YNL252C	MRPL17
YNL284C	MRPL10
YNL306W	MRPS18
YNR002C	ATO2
YNR022C	MRPL50
YNR036C	MRPS12
YNR037C	RSM19
YNR040W	YNR040W
YNR041C	COQ2
YOL023W	IFM1
YOL025W	LAG2
YOL033W	MSE1
YOL042W	NGL1
YOL071W	EMI5
YOR004W	UTP23
YOR017W	PET127
YOR022C	YOR022C
YOR040W	GLO4
YOR045W	TOM6
YOR090C	PTC5
YOR100C	CRC1
YOR150W	MRPL23
YOR158W	PET123
YOR196C	LIP5
YOR201C	MRM1
YOR221C	MCT1
YOR226C	ISU2
YOR227W	HER1
YOR266W	PNT1
YOR274W	MOD5
YPL013C	MRPS16
YPL029W	SUV3
YPL036W	PMA2
YPL040C	ISM1
YPL096W	PNG1
YPL097W	MSY1
YPL099C	AIM43
YPL104W	MSD1
YPL105C	SYH1
YPL107W	YPL107W
YPL132W	COX11
YPL134C	ODC1
YPL222W	FMP40
YPL252C	YAH1
YPR006C	ICL2
YPR021C	AGC1
YPR047W	MSF1
YPR067W	ISA2
YPR100W	MRPL51
YPR125W	YLH47
YPR155C	NCA2
YPR166C	MRP2
YPR184W	GDB1
Not detected
YBR104W	YMC2
YDR039C	ENA2
YDR342C	HXT7
YDR384C	ATO3
YGL225W	VRG4
YGR255C	COQ6
YJR111C	YJR111C
YLR142W	PUT1
YLR454W	FMP27
YOR316C	COT1
YPR033C	HTS1
YAL008W	FUN14
YAL010C	MDM10
YAL011W	SWC3
YAL056W	GPB2
YBL013W	FMT1
YBR047W	FMP23
YBR085W	AAC3
YBR097W	VPS15
YBR140C	IRA1
YBR150C	TBS1
YBR163W	EXO5
YBR211C	AME1
YBR238C	YBR238C
YBR269C	FMP21
YCL005W	LDB16
YCR003W	MRPL32
YCR032W	BPH1
YCR079W	PTC6
YDL033C	SLM3
YDL048C	STP4
YDL069C	CBS1
YDL104C	QRI7
YDL119C	YDL119C
YDL203C	ACK1
YDL207W	GLE1
YDL222C	FMP45
YDL240W	LRG1
YDL248W	COS7
YDR027C	VPS54
YDR065W	RRG1
YDR069C	DOA4
YDR070C	FMP16
YDR125C	ECM18
YDR185C	UPS3
YDR332W	IRC3
YDR343C	HXT6
YDR350C	ATP22
YDR393W	SHE9
YDR470C	UGO1
YDR514C	YDR514C
YDR538W	PAD1
YEL006W	YEA6
YEL061C	CIN8
YER033C	ZRG8
YER141W	COX15
YER153C	PET122
YFL011W	HXT10
YFL046W	FMP32
YFR031C	SMC2
YFR045W	YFR045W
YGL005C	COG7
YGL085W	LCL3
YGL093W	SPC105
YGL104C	VPS73
YGL136C	MRM2
YGL219C	MDM34
YGL229C	SAP4
YGL240W	DOC1
YGR015C	YGR015C
YGR046W	TAM41
YGR052W	FMP48
YGR062C	COX18
YGR091W	PRP31
YGR096W	TPC1
YGR098C	ESP1
YGR101W	PCP1
YGR144W	THI4
YGR169C	PUS6
YGR222W	PET54
YGR260W	TNA1
YHL035C	VMR1
YHR002W	LEU5
YHR004C	NEM1
YHR017W	YSC83
YHR050W	SMF2
YHR067W	HTD2
YHR075C	PPE1
YHR162W	YHR162W
YHR186C	KOG1
YHR189W	PTH1
YIL006W	YIA6
YIL047C	SYG1
YIL077C	YIL077C
YIL087C	AIM19
YIL111W	COX5B
YIL114C	POR2
YIL134W	FLX1
YJL003W	COX16
YJL023C	PET130
YJL043W	YJL043W
YJL070C	YJL070C
YJL102W	MEF2
YJL113W	YJL113W
YJL133W	MRS3
YJL147C	YJL147C
YJL161W	FMP33
YJL209W	CBP1
YJR039W	YJR039W
YJR062C	NTA1
YJR089W	BIR1
YJR098C	YJR098C
YKL011C	CCE1
YKL033W	TTI1
YKL055C	OAR1
YKL070W	YKL070W
YKL084W	HOT13
YKL132C	RMA1
YKL162C	YKL162C
YKL187C	YKL187C
YKL205W	LOS1
YKL208W	CBT1
YKR010C	TOF2
YKR019C	IRS4
YKR027W	BCH2
YKR052C	MRS4
YKR063C	LAS1
YKR087C	OMA1
YLL009C	COX17
YLL060C	GTT2
YLR001C	YLR001C
YLR067C	PET309
YLR087C	CSF1
YLR091W	GEP5
YLR105C	SEN2
YLR164W	YLR164W
YLR165C	PUS5
YLR168C	UPS2
YLR183C	TOS4
YLR188W	MDL1
YLR190W	MMR1
YLR204W	QRI5
YLR247C	IRC20
YLR251W	SYM1
YLR281C	YLR281C
YLR305C	STT4
YLR346C	YLR346C
YLR356W	ATG33
YLR368W	MDM30
YLR424W	SPP382
YML133C	YML133C
YMR003W	AIM34
YMR023C	MSS1
YMR035W	IMP2
YMR059W	SEN15
YMR064W	AEP1
YMR066W	SOV1
YMR078C	CTF18
YMR150C	IMP1
YMR166C	YMR166C
YMR177W	MMT1
YMR207C	HFA1
YMR221C	YMR221C
YMR232W	FUS2
YMR252C	YMR252C
YMR257C	PET111
YMR287C	DSS1
YMR301C	ATM1
YNL003C	PET8
YNL063W	MTQ1
YNL070W	TOM7
YNL144C	YNL144C
YNL211C	YNL211C
YNL213C	RRG9
YNL249C	MPA43
YNL268W	LYP1
YNL318C	HXT14
YNL328C	MDJ2
YNR045W	PET494
YNR055C	HOL1
YNR070W	PDR18
YOL045W	PSK2
YOL081W	IRA2
YOL095C	HMI1
YOL096C	COQ3
YOL129W	VPS68
YOL141W	PPM2
YOR011W	AUS1
YOR037W	CYC2
YOR070C	GYP1
YOR125C	CAT5
YOR130C	ORT1
YOR147W	MDM32
YOR188W	MSB1
YOR191W	ULS1
YOR205C	GEP3
YOR228C	YOR228C
YOR297C	TIM18
YOR305W	RRG7
YOR330C	MIP1
YOR334W	MRS2
YOR350C	MNE1
YOR355W	GDS1
YOR384W	FRE5
YPL005W	AEP3
YPL060W	MFM1
YPL069C	BTS1
YPL083C	SEN54
YPL103C	FMP30
YPL109C	YPL109C
YPL148C	PPT2
YPL155C	KIP2
YPL168W	YPL168W
YPL172C	COX10
YPL224C	MMT2
YPR011C	YPR011C
YPR054W	SMK1
YPR095C	SYT1
YPR098C	YPR098C
YPR116W	RRG8
YPR134W	MSS18
YPR151C	SUE1

## Sheet: AminoAcids
ORF	gene
YAL012W	CYS3
YAL062W	GDH3
YOR375C	GDH1
YPR145W	ASN1
YGR124W	ASN2
YNL277W	MET2
YOR241W	MET7
YHR137W	ARO9
YBR166C	TYR1
YBL068W	PRS4
YBR115C	LYS2
YBR218C	PYC2
YBR248C	HIS7
YBR249C	ARO4
YBR263W	SHM1
YCL009C	ILV6
YCL018W	LEU2
YCL030C	HIS4
YCR005C	CIT2
YCR053W	THR4
YDL021W	GPM2
YDL066W	IDP1
YDL131W	LYS21
YDL171C	GLT1
YDL182W	LYS20
YDL215C	GDH2
YDR035W	ARO3
YDR050C	TPI1
YDR127W	ARO1
YDR158W	HOM2
YDR234W	LYS4
YDR300C	PRO1
YDR354W	TRP4
YDR502C	SAM2
YEL046C	GLY1
YER023W	PRO3
YER052C	HOM3
YER055C	HIS1
YER069W	ARG5,6
YER081W	SER3
YER086W	ILV1
YER090W	TRP2
YER091C	MET6
YER099C	PRS2
YGL009C	LEU1
YGL026C	TRP5
YGL062W	PYC1
YGL148W	ARO2
YGL184C	STR3
YGL202W	ARO8
YGR012W	MCY1
YGR043C	NQM1
YGR155W	CYS4
YGR208W	SER2
YHL011C	PRS3
YHR018C	ARG4
YHR025W	THR1
YHR208W	BAT1
YIL020C	HIS6
YIL074C	SER33
YIL094C	LYS12
YIL116W	HIS5
YJL088W	ARG3
YJL121C	RPE1
YJL200C	ACO2
YJR016C	ILV3
YJR130C	STR2
YJR139C	HOM6
YJR148W	BAT2
YKL106W	AAT1
YKL181W	PRS1
YKL211C	TRP3
YKR043C	SHB17
YLR027C	AAT2
YLR058C	SHM2
YLR089C	ALT1
YLR180W	SAM1
YLR303W	MET17
YLR304C	ACO1
YLR354C	TAL1
YLR355C	ILV5
YMR062C	ARG7
YMR108W	ILV2
YNL037C	IDH1
YNR001C	CIT1
YNR050C	LYS9
YOL058W	ARG1
YOL061W	PRS5
YOL140W	ARG8
YOR095C	RKI1
YOR108W	LEU9
YOR136W	IDH2
YOR184W	SER1
YOR283W	YOR283W
YOR323C	PRO2
YPL111W	CAR1
YPR035W	GLN1
YPR060C	ARO7
YBR117C	TKL2
YDR007W	TRP1
YFR025C	HIS2
YHR033W	YHR033W
YJL071W	ARG2
YLR174W	IDP2
YMR323W	ERR3
YNL009W	IDP3
YNL316C	PHA2
YOR202W	HIS3
YOR393W	ERR1
YPL281C	ERR2
YPR001W	CIT3
Not in data
YCL064C	CHA1
YIR034C	LYS1
YML082W	YML082W
YNL104C	LEU4
YDR111C	ALT2
YFR055W	IRC7
YLL058W	YLL058W
YOL056W	GPM3

## Sheet: Lipids
ORF	gene
YBR026C	ETR1
YBR029C	CDS1
YBR145W	ADH5
YBR159W	IFA38
YBR244W	GPX2
YDL015C	TSC13
YDL022W	GPD1
YDL052C	SLC1
YDL168W	SFA1
YDR062W	LCB2
YDR294C	DPL1
YDR368W	YPR1
YER062C	HOR2
YER073W	ALD5
YGL001C	ERG26
YGL012W	ERG4
YGL055W	OLE1
YGR060W	ERG25
YGR157W	CHO2
YGR175C	ERG1
YGR202C	PCT1
YHR007C	ERG11
YHR042W	NCP1
YHR072W	ERG7
YHR104W	GRE3
YHR190W	ERG9
YIL009W	FAA3
YIL053W	RHR2
YIL124W	AYR1
YIR037W	HYR1
YJL167W	ERG20
YKL150W	MCR1
YKL182W	FAS1
YKR067W	GPT2
YLR056W	ERG3
YLR100W	ERG27
YLR133W	CKI1
YLR372W	SUR4
YML008C	ERG6
YML070W	DAK1
YML075C	HMG1
YML126C	ERG13
YMR008C	PLB1
YMR015C	ERG5
YMR083W	ADH3
YMR208W	ERG12
YMR220W	ERG8
YMR246W	FAA4
YMR296C	LCB1
YMR318C	ADH6
YNL045W	LAP2
YNL130C	CPT1
YNL169C	PSD1
YNR016C	ACC1
YNR019W	ARE2
YOL059W	GPD2
YOL086C	ADH1
YOR120W	GCY1
YOR171C	LCB4
YOR317W	FAA1
YOR374W	ALD4
YPL028W	ERG10
YPL061W	ALD6
YPL206C	PGC1
YPL231W	FAS2
YPR113W	PIS1
YDR297W	SUR2
YER015W	FAA2
YER061C	CEM1
YGL205W	POX1
YGL256W	ADH4
YGR007W	ECT1
YGR110W	CLD1
YGR205W	YGR205W
YHL003C	LAG1
YHL032C	GUT1
YHR123W	EPT1
YIL155C	GUT2
YIL160C	POT1
YJR019C	TES1
YKL026C	GPX1
YKR031C	SPO14
YLR299W	ECM38
YMR134W	YMR134W
YMR165C	PAH1
YMR303C	ADH2
YNR008W	LRO1
Not in data
YER026C	CHO1
YLR450W	HMG2
YMR202W	ERG2
YBL011W	SCT1
YBR183W	YPC1
YBR265W	TSC10
YCL004W	PGS1
YCR034W	FEN1
YCR048W	ARE1
YCR105W	ADH7
YCR107W	AAD3
YDL142C	CRD1
YDL243C	AAD4
YDR058C	TGL2
YDR147W	EKI1
YDR402C	DIT2
YER044C	ERG28
YFL053W	DAK2
YFL056C	AAD6
YGR170W	PSD2
YJL097W	PHS1
YJL134W	LCB3
YJL196C	ELO1
YJR155W	AAD10
YKL008C	LAC1
YKR053C	YSR3
YKR089C	TGL4
YML059C	NTE1
YMR006C	PLB2
YMR313C	TGL3
YNL280C	ERG24
YNL331C	AAD14
YOL011W	PLB3
YOR175C	ALE1
YPL087W	YDC1
YPR140W	TAZ1

## Sheet: Chaperon
ORF	gene
YAL005C	SSA1
YBR072W	HSP26
YBR155W	CNS1
YBR169C	SSE2
YDL229W	SSB1
YDR168W	CDC37
YDR171W	HSP42
YDR214W	AHA1
YDR258C	HSP78
YDR533C	HSP31
YER103W	SSA4
YER156C	YER156C
YFL014W	HSP12
YFL016C	MDJ1
YJL159W	HSP150
YJR032W	CPR7
YJR045C	SSC1
YKL073W	LHS1
YKL117W	SBA1
YLL024C	SSA2
YLL026W	HSP104
YLR216C	CPR6
YLR259C	HSP60
YLR369W	SSQ1
YMR186W	HSC82
YNL007C	SIS1
YNL064C	YDJ1
YNL209W	SSB2
YNL281W	HCH1
YOL031C	SIL1
YOR020C	HSP10
YOR027W	STI1
YOR057W	SGT1
YPL106C	SSE1
YPL240C	HSP82
YBL075C	SSA3
YGL018C	JAC1
YHR034C	PIH1
YLR409C	UTP21
YMR161W	HLJ1
YNL310C	ZIM17
Not in data
YIL104C	SHQ1
YCR021C	HSP30
YCR060W	TAH1
YDR319C	YDR319C
YEL030W	ECM10
YLR036C	YLR036C
YMR155W	YMR155W
YMR322C	SNO4
YNL077W	APJ1
YOL029C	YOL029C
YOR097C	YOR097C
YOR391C	HSP33
YPL257W	YPL257W
YPL264C	YPL264C
YPL280W	HSP32
YPR003C	YPR003C
YPR061C	JID1
YPR089W	YPR089W

## Sheet: Nucleotides
ORF	gene
YAR015W	ADE1
YBL039C	URA7
YBL068W	PRS4
YBR111C	YSA1
YBR252W	DUT1
YCL050C	APA1
YDR226W	ADK1
YDR353W	TRR1
YDR408C	ADE8
YDR454C	GUK1
YER070W	RNR1
YER099C	PRS2
YGL234W	ADE5_7
YGR061C	ADE6
YGR180C	RNR4
YHL011C	PRS3
YHR128W	FUR1
YHR144C	DCD1
YHR216W	IMD2
YIR029W	DAL2
YJL005W	CYR1
YJL026W	RNR2
YJL130C	URA2
YJR010W	MET3
YJR103W	URA8
YJR105W	ADO1
YJR109C	CPA2
YKL001C	MET14
YKL024C	URA6
YKL067W	YNK1
YKL181W	PRS1
YKL216W	URA1
YLR028C	ADE16
YLR209C	PNP1
YLR359W	ADE13
YLR420W	URA4
YLR432W	IMD3
YML022W	APT1
YML035C	AMD1
YML056C	IMD4
YML106W	URA5
YMR120C	ADE17
YMR217W	GUA1
YMR300C	ADE4
YNL141W	AAH1
YNL220W	ADE12
YOL061W	PRS5
YOR074C	CDC21
YOR128C	ADE2
YOR303W	CPA1
YPR062W	FCY1
YDR305C	HNT2
YDR530C	APA2
YEL021W	URA3
YGL248W	PDE1
YHR201C	PPX1
YIR032C	DAL3
YJR057W	CDC8
YNR012W	URK1
YOR360C	PDE2
Not in data
YDL238C	GUD1
YDR441C	APT2
YER005W	YND1
YER170W	ADK2
YIL066C	RNR3
YIR027C	DAL1
YLR245C	CDD1
YMR271C	URA10

## Sheet: Stress
ORF	gene
YAR007C	RFA1
YBL051C	PIN4
YBR006W	UGA2
YBR082C	UBC4
YBR088C	POL30
YBR126C	TPS1
YBR272C	HSM3
YCL035C	GRX1
YCR009C	RVS161
YCR083W	TRX3
YDL100C	GET3
YDL101C	DUN1
YDL166C	FAP7
YDL190C	UFD2
YDL235C	YPD1
YDR001C	NTH1
YDR074W	TPS2
YDR092W	UBC13
YDR097C	MSH6
YDR098C	GRX3
YDR477W	SNF1
YDR513W	GRX2
YEL037C	RAD23
YEL060C	PRB1
YER042W	MXR1
YER089C	PTC2
YER133W	GLC7
YFL039C	ACT1
YGL019W	CKB1
YGL087C	MMS2
YGR086C	PIL1
YGR234W	YHB1
YHR114W	BZZ1
YIL035C	CKA1
YJL034W	KAR2
YJL173C	RFA3
YJR068W	RFC2
YJR144W	MGM101
YKL054C	DEF1
YKL088W	CAB3
YKL113C	RAD27
YKL114C	APN1
YKL129C	MYO3
YKL213C	DOA1
YKR066C	CCP1
YKR072C	SIS2
YLR043C	TRX1
YML021C	UNG1
YML028W	TSA1
YML086C	ALO1
YMR092C	AIP1
YMR109W	MYO5
YMR140W	SIP5
YMR173W	DDR48
YMR214W	SCJ1
YNL036W	NCE103
YNL133C	FYV6
YNL290W	RFC3
YNL307C	MCK1
YNL312W	RFA2
YOL064C	MET22
YOL090W	MSH2
YOL094C	RFC4
YOR039W	CKB2
YOR061W	CKA2
YOR217W	RFC1
YPL004C	LSP1
YPL059W	GRX5
YPL091W	GLR1
YPL154C	PEP4
YPL188W	POS5
YPL204W	HRR25
YBL061C	SKT5
YBR016W	YBR016W
YBR073W	RDH54
YBR195C	MSI1
YCL033C	MXR2
YDL102W	POL3
YDL164C	CDC9
YDR059C	UBC5
YDR162C	NBP2
YER095W	RAD51
YER142C	MAG1
YER174C	GRX4
YFR019W	FAB1
YGL094C	PAN2
YGR088W	CTT1
YGR258C	RAD2
YHR106W	TRR2
YHR120W	MSH1
YHR205W	SCH9
YIL128W	MET18
YJL087C	TRL1
YJR043C	POL32
YJR052W	RAD7
YKL025C	PAN3
YKL201C	MNN4
YLL010C	PSR1
YLR319C	BUD6
YLR337C	VRP1
YLR427W	MAG2
YML032C	RAD52
YML058W	SML1
YML102W	CAC2
YMR139W	RIM11
YMR156C	TPP1
YMR224C	MRE11
YMR250W	GAD1
YNL091W	NST1
YNL102W	POL1
YNL160W	YGP1
YNL250W	RAD50
YNL259C	ATX1
YNL262W	POL2
YNL271C	BNI1
YOR008C	SLG1
YOR043W	WHI2
YOR181W	LAS17
YPL153C	RAD53
YPL196W	OXR1
YPR135W	CTF4
Not in data
YBR093C	PHO5
YDR182W	CDC1
YLR157C	ASP3-2
YLR350W	ORM2
YNR074C	AIF1
YAL015C	NTG1
YAL028W	FRT2
YBL019W	APN2
YBL088C	TEL1
YBR001C	NTH2
YBR114W	RAD16
YBR132C	AGP2
YBR136W	MEC1
YBR216C	YBP1
YBR223C	TDP1
YBR228W	SLX1
YBR274W	CHK1
YBR275C	RIF1
YCL051W	LRE1
YCR014C	POL4
YCR044C	PER1
YCR066W	RAD18
YCR092C	MSH3
YDL013W	SLX5
YDL059C	RAD59
YDL079C	MRK1
YDL200C	MGT1
YDL220C	CDC13
YDR004W	RAD57
YDR030C	RAD28
YDR076W	RAD55
YDR082W	STN1
YDR184C	ATC1
YDR206W	EBS1
YDR217C	RAD9
YDR263C	DIN7
YDR288W	NSE3
YDR369C	XRS2
YDR386W	MUS81
YDR419W	RAD30
YDR499W	LCD1
YDR545W	YRF1-1
YEL019C	MMS21
YER011W	TIR1
YER019W	ISC1
YER162C	RAD4
YER173W	RAD24
YER190W	YRF1-2
YFL033C	RIM15
YFR027W	ECO1
YGL090W	LIF1
YGL163C	RAD54
YGR008C	STF2
YGR014W	MSB2
YGR038W	ORM1
YGR097W	ASK10
YGR099W	TEL2
YGR296W	YRF1-3
YHL028W	WSC4
YHL048W	COS8
YHR023W	MYO1
YHR079C	IRE1
YHR164C	DNA2
YIL139C	REV7
YIL147C	SLN1
YIL153W	RRD1
YIL154C	IMP2
YIL159W	BNR1
YIR002C	MPH1
YIR033W	MGA2
YJL090C	DPB11
YJL092W	SRS2
YJL144W	YJL144W
YJR035W	RAD26
YKL020C	SPT23
YKL048C	ELM1
YLL039C	UBI4
YLR007W	NSE1
YLR010C	TEN1
YLR019W	PSR2
YLR032W	RAD5
YLR035C	MLH2
YLR155C	ASP3-1
YLR158C	ASP3-3
YLR160C	ASP3-4
YLR176C	RFX1
YLR233C	EST1
YLR234W	TOP3
YLR260W	LCB5
YLR318W	EST2
YLR320W	MMS22
YLR383W	SMC6
YLR466W	YRF1-4
YLR467W	YRF1-5
YML060W	OGG1
YML061C	PIF1
YML088W	UFO1
YML095C	RAD10
YMR137C	PSO2
YMR284W	YKU70
YNL032W	SIW14
YNL082W	PMS1
YNL099C	OCA1
YNL190W	YNL190W
YNL234W	YNL234W
YNL283C	WSC2
YNL339C	YRF1-6
YOL034W	SMC5
YOL043C	NTG2
YOR005C	DNL4
YOR010C	TIR2
YOR178C	GAC1
YOR324C	FRT1
YOR346W	REV1
YOR368W	RAD17
YOR386W	PHR1
YPL022W	RAD1
YPL046C	ELC1
YPL164C	MLH3
YPL167C	REV3
YPL242C	IQG1
YPL283C	YRF1-7
YPR005C	HAL1
YPR026W	ATH1
YPR164W	MMS1

## Sheet: ER
ORF	gene
YAL007C	ERP2
YAL023C	PMT2
YAL042W	ERV46
YAL053W	FLC2
YAR042W	SWH1
YBR002C	RER2
YBR078W	ECM33
YBR106W	PHO88
YBR130C	SHE3
YBR160W	CDC28
YBR170C	NPL4
YBR171W	SEC66
YBR229C	ROT2
YCL043C	PDI1
YCL045C	EMC1
YCR011C	ADP1
YCR067C	SED4
YDL019C	OSH2
YDL065C	PEX19
YDL072C	YET3
YDL095W	PMT1
YDL121C	YDL121C
YDL122W	UBP1
YDL126C	CDC48
YDL193W	NUS1
YDR086C	SSS1
YDR150W	NUM1
YDR189W	SLY1
YDR233C	RTN1
YDR292C	SRP101
YDR304C	CPR5
YDR434W	GPI17
YDR476C	YDR476C
YDR518W	EUG1
YDR519W	FPR2
YEL001C	IRC22
YEL002C	WBP1
YEL031W	SPF1
YER004W	FMP52
YER072W	VTC1
YER083C	GET2
YER100W	UBC6
YER120W	SCS2
YFL004W	VTC2
YFL005W	SEC4
YFL038C	YPT1
YFL041W	FET5
YFL048C	EMP47
YFR041C	ERJ5
YGL020C	GET1
YGL027C	CWH41
YGL200C	EMP24
YGL228W	SHE10
YGL231C	EMC4
YGR106C	VOA1
YGR152C	RSR1
YHR001W	OSH7
YHR027C	RPN1
YHR039C	MSC7
YHR098C	SFB3
YHR135C	YCK1
YHR188C	GPI16
YIL005W	EPS1
YIL027C	KRE27
YIR004W	DJP1
YIR038C	GTT1
YJL002C	OST1
YJL012C	VTC4
YJL080C	SCP160
YJL117W	PHO86
YJL145W	SFH5
YJL171C	YJL171C
YJL183W	MNN11
YJR051W	OSM1
YJR088C	EMC2
YJR117W	STE24
YJR143C	PMT4
YKL065C	YET1
YKL077W	YKL077W
YKL094W	YJU3
YKL100C	YKL100C
YKL175W	ZRT3
YKL212W	SAC1
YKR003W	OSH6
YLL023C	POM33
YLL048C	YBT1
YLR066W	SPC3
YLR078C	BOS1
YLR268W	SEC22
YLR286C	CTS1
YLR292C	SEC72
YLR378C	SEC61
YML013W	UBX2
YML048W	GSF2
YML072C	TCB3
YML125C	PGA3
YML130C	ERO1
YMR029C	FAR8
YMR110C	HFD1
YMR149W	SWP1
YMR152W	YIM1
YMR183C	SSO2
YMR264W	CUE1
YMR266W	RSN1
YMR272C	SCS7
YMR297W	PRC1
YMR298W	LIP1
YMR304W	UBP15
YMR305C	SCW10
YNL044W	YIP3
YNL048W	ALG11
YNL087W	TCB2
YNL149C	PGA2
YNL181W	YNL181W
YNL323W	LEM3
YNR021W	YNR021W
YNR026C	SEC12
YNR030W	ALG12
YOL030W	GAS5
YOL088C	MPD2
YOL147C	PEX11
YOR086C	TCB1
YOR165W	SEY1
YOR198C	BFR1
YOR254C	SEC63
YOR285W	RDL1
YOR288C	MPD1
YOR311C	DGK1
YOR336W	KRE5
YPL019C	VTC3
YPL050C	MNN9
YPL085W	SEC16
YPL094C	SEC62
YPL207W	TYW1
YPL218W	SAR1
YPR028W	YOP1
YPR037C	ERV2
YPR063C	YPR063C
YPR088C	SRP54
YPR114W	YPR114W
YPR139C	VPS66
YPR165W	RHO1
YPR173C	VPS4
YPR181C	SEC23
YPR183W	DPM1
YER019C-A	SBH2
YDR245W	MNN10
YAR031W	PRM9
YBR023C	CHS3
YBR041W	FAT1
YBR096W	YBR096W
YBR110W	ALG1
YBR204C	YBR204C
YBR273C	UBX7
YDL027C	YDL027C
YDL204W	RTN2
YDR049W	VMS1
YDR056C	YDR056C
YDR200C	VPS64
YDR221W	GTB1
YDR320C	SWA2
YER166W	DNF1
YFL042C	YFL042C
YFR039C	YFR039C
YGL047W	ALG13
YGL053W	PRM8
YGL065C	ALG2
YGL145W	TIP20
YGR089W	NNF2
YGR172C	YIP1
YGR236C	SPG1
YHR192W	YHR192W
YIL004C	BET1
YIL016W	SNL1
YIL039W	TED1
YJL158C	CIS3
YJL192C	SOP4
YJR073C	OPI3
YKL119C	VPH2
YKL154W	SRP102
YKR055W	RHO4
YLR207W	HRD3
YLR241W	YLR241W
YLR324W	PEX30
YLR440C	SEC39
YML055W	SPC2
YML101C	CUE4
YML128C	MSC1
YMR238W	DFG5
YNL111C	CYB5
YNL156C	NSG2
YNL219C	ALG9
YNL258C	DSL1
YNR065C	YNR065C
YOR059C	YOR059C
YPL186C	UIP4
YPR091C	YPR091C
YBR162W-A	YSY6
YKL065W-A	YKL065W-A
YER087C-B	SBH1
Not in data
YBR068C	BAP2
YBR069C	TAT1
YBR092C	PHO3
YBR283C	SSH1
YBR287W	YBR287W
YCL025C	AGP1
YCL052C	PBN1
YDR093W	DNF2
YDR498C	SEC20
YDR508C	GNP1
YGL022W	STT3
YGL077C	HNM1
YGR284C	ERV29
YHL016C	DUR3
YHR045W	YHR045W
YHR133C	NSG1
YHR181W	SVP26
YIL030C	SSM4
YIR022W	SEC11
YJR040W	GEF1
YKL207W	AIM27
YKR039W	GAP1
YLR065C	YLR065C
YLR088W	GAA1
YLR414C	PUN1
YML123C	PHO84
YMR058W	FET3
YMR123W	PKR1
YNL263C	YIF1
YOL060C	MAM3
YOR016C	ERP4
YOR085W	OST3
YPL092W	SSU1
YPL137C	GIP3
YPL227C	ALG5
YPL274W	SAM3
YPR149W	NCE102
YNL024C-A	KSH1
YER074W-A	YOS1
YAL009W	SPO7
YAL026C	DRS2
YAL058W	CNE1
YAR033W	MST28
YBL020W	RFT1
YBL040C	ERD2
YBL082C	ALG3
YBR004C	GPI18
YBR005W	RCR1
YBR013C	YBR013C
YBR036C	CSG2
YBR054W	YRO2
YBR070C	ALG14
YBR201W	DER1
YBR207W	FTH1
YBR210W	ERV15
YBR243C	ALG7
YBR290W	BSD2
YBR293W	VBA2
YBR296C	PHO89
YCL027W	FUS1
YCL069W	VBA3
YCR017C	CWH43
YCR068W	ATG15
YCR094W	CDC50
YDL018C	ERP3
YDL091C	UBX3
YDL093W	PMT5
YDL212W	SHR3
YDL232W	OST4
YDL241W	YDL241W
YDR018C	YDR018C
YDR046C	BAP3
YDR057W	YOS9
YDR126W	SWF1
YDR160W	SSY1
YDR196C	CAB5
YDR205W	MSC2
YDR302W	GPI11
YDR307W	YDR307W
YDR326C	YSP2
YDR329C	PEX3
YDR331W	GPI8
YDR349C	YPS7
YDR410C	STE14
YDR411C	DFM1
YDR437W	GPI19
YDR456W	NHX1
YDR461W	MFA1
YDR479C	PEX29
YDR492W	IZH1
YDR504C	SPG3
YEL004W	YEA4
YEL016C	NPP2
YEL043W	YEL043W
YEL063C	CAN1
YEL064C	AVT2
YEL068C	YEL068C
YEL069C	HXT13
YER039C	HVG1
YER076C	YER076C
YER118C	SHO1
YER140W	YER140W
YFL025C	BST1
YFL055W	AGP3
YFR008W	FAR7
YFR018C	YFR018C
YFR020W	YFR020W
YFR026C	ULI1
YFR042W	KEG1
YFR048W	RMD8
YGL002W	ERP6
YGL010W	YGL010W
YGL032C	AGA2
YGL051W	MST27
YGL054C	ERV14
YGL075C	MPS2
YGL084C	GUP1
YGL098W	USE1
YGL126W	SCS3
YGL139W	FLC3
YGL140C	YGL140C
YGL160W	AIM14
YGL204C	YGL204C
YGL226C-A	OST5
YGL230C	YGL230C
YGL247W	BRR6
YGL255W	ZRT1
YGL258W	VEL1
YGR004W	PEX31
YGR016W	YGR016W
YGR026W	YGR026W
YGR036C	CAX4
YGR105W	VMA21
YGR121C	MEP1
YGR141W	VPS62
YGR149W	YGR149W
YGR177C	ATF2
YGR191W	HIP1
YGR199W	PMT6
YGR213C	RTA1
YGR216C	GPI1
YGR227W	DIE2
YGR263C	SAY1
YHR036W	BRL1
YHR080C	YHR080C
YHR101C	BIG1
YHR110W	ERP5
YHR140W	YHR140W
YHR142W	CHS7
YHR155W	YSP1
YHR175W	CTR2
YHR204W	MNL1
YIL023C	YKE4
YIL040W	APQ12
YIL049W	DFG10
YIL089W	YIL089W
YIL090W	ICE2
YIL123W	SIM1
YIR014W	YIR014W
YJL062W	LAS21
YJL073W	JEM1
YJL079C	PRY1
YJL091C	GWT1
YJL094C	KHA1
YJL108C	PRM10
YJL139C	YUR1
YJR013W	GPI14
YJR015W	YJR015W
YJR106W	ECM27
YJR116W	YJR116W
YJR118C	ILM1
YJR126C	VPS70
YJR131W	MNS1
YKL004W	AUR1
YKL046C	DCW1
YKL047W	YKL047W
YKL124W	SSH4
YKL165C	MCD4
YKL174C	TPO5
YKL178C	STE3
YKR013W	PRY2
YKR022C	NTR2
YKR051W	YKR051W
YLL006W	MMM1
YLL014W	EMC6
YLL015W	BPT1
YLL031C	GPI13
YLL052C	AQY2
YLL055W	YCT1
YLR004C	THI73
YLR023C	IZH3
YLR047C	FRE8
YLR050C	YLR050C
YLR057W	YLR057W
YLR064W	PER33
YLR072W	YLR072W
YLR080W	EMP46
YLR084C	RAX2
YLR130C	ZRT2
YLR138W	NHA1
YLR205C	HMX1
YLR238W	FAR10
YLR242C	ARV1
YLR246W	ERF2
YLR283W	YLR283W
YLR312C	YLR312C
YLR404W	FLD1
YLR411W	CTR3
YLR426W	YLR426W
YLR459W	GAB1
YML019W	OST6
YML029W	USA1
YML067C	ERV41
YMR010W	YMR010W
YMR013C	SEC59
YMR022W	UBC7
YMR040W	YET2
YMR052W	FAR3
YMR065W	KAR5
YMR162C	DNF3
YMR171C	EAR1
YMR200W	ROT1
YMR258C	YMR258C
YMR274C	RCE1
YMR281W	GPI12
YMR292W	GOT1
YMR306W	FKS3
YNL012W	SPO1
YNL029C	KTR5
YNL046W	YNL046W
YNL058C	YNL058C
YNL080C	EOS1
YNL095C	YNL095C
YNL125C	ESBP6
YNL127W	FAR11
YNL145W	MFA2
YNL146W	YNL146W
YNL158W	PGA1
YNL159C	ASI2
YNL188W	KAR1
YNL194C	YNL194C
YNL257C	SIP3
YNL270C	ALP1
YNL291C	MID1
YNL294C	RIM21
YNL304W	YPT11
YNL305C	YNL305C
YNR039C	ZRG17
YNR048W	YNR048W
YNR056C	BIO5
YNR062C	YNR062C
YNR075W	COS10
YOL003C	PFA4
YOL009C	MDM12
YOL013C	HRD1
YOL020W	TAT2
YOL065C	INP54
YOL073C	YOL073C
YOL084W	PHM7
YOL092W	YOL092W
YOL110W	SHR5
YOL162W	YOL162W
YOR002W	ALG6
YOR003W	YSP3
YOR044W	IRC23
YOR049C	RSB1
YOR060C	YOR060C
YOR067C	ALG8
YOR075W	UFE1
YOR079C	ATX2
YOR092W	ECM3
YOR103C	OST2
YOR149C	SMP3
YOR152C	YOR152C
YOR154W	SLP1
YOR223W	YOR223W
YOR245C	DGA1
YOR307C	SLY41
YOR321W	PMT3
YOR377W	ATF1
YPL006W	NCR1
YPL076W	GPI2
YPL175W	SPT14
YPL189W	GUP2
YPL191C	YPL191C
YPL200W	CSM4
YPL221W	FLC1
YPL244C	HUT1
YPR027C	YPR027C
YPR071W	YPR071W
YPR075C	OPY2
YPR109W	YPR109W
YPR138C	MEP3
YPR192W	AQY1
YPR198W	SGE1
YAL064W-B	YAL064W-B
YMR251W-A	HOR7
YMR316C-A	YMR316C-A
YJR010C-A	SPC1
YJR112W-A	YJR112W-A
YMR122W-A	YMR122W-A
YOR032W-A	YOR032W-A
YPL096C-A	ERI1
YBR058C-A	TSC3
YBR126W-A	YBR126W-A
YDR524C-B	YDR524C-B
YER053C-A	YER053C-A
YGL194C-A	YGL194C-A
YGL041C-B	YGL041C-B
YHR212W-A	YHR212W-A
YIL102C-A	YIL102C-A

## Sheet: Energy
ORF	gene
YNL241C	ZWF1
YHR163W	SOL3
YNR034W	SOL1
YPR074C	TKL1
YCR036W	RBK1
YKL127W	PGM1
YMR278W	PGM3
YMR105C	PGM2
YDR248C	YDR248C
YDL078C	MDH3
YLR447C	VMA6
YGR020C	VMA7
YKL080W	VMA5
YDL185W	VMA1
YBR127C	VMA2
YOR332W	VMA4
YOR270C	VPH1
YEL051W	VMA8
YPR036W	VMA13
YBR011C	IPP1
YGR248W	SOL4
YGR256W	GND2
YLR377C	FBP1
YOL126C	MDH2
YKR097W	PCK1
Not in data
YMR054W	STV1
YPL017C	IRC15
YMR118C	YMR118C
YMR256C	COX7
YEL027W	VMA3
YPL234C	VMA11
YHR026W	VMA16

[truncated: 2 more sheets: Transcription, Ohters]
