# Supplementary material for: Proteome allocations change linearly with the specific growth rate of Saccharomyces cerevisiae under glucose limitation
Source: Nat Commun. 2022 May 20;13:2819. doi: 10.1038/s41467-022-30513-2 (PMC9122918; doi:10.1038/s41467-022-30513-2)
Supplement: Supplementary file 6 — Supplementary Data 3 [file 41467_2022_30513_MOESM6_ESM.xlsx]

## Sheet: Sheet1
mRNA	0.027 h-1	0.044 h-1	0.102 h-1	0.152 h-1	0.214 h-1	0.254 h-1	0.284 h-1	0.334 h-1	0.379 h-1
R0010W	74.4431	76.4333	48.4584	49.5499	54.3716	54.6876	64.3714	32.9189	41.3888
YLR155C	37.8446	36.3322	35.0915	31.0966	29.0667	26.8188	29.5928	23.029	22.4319
YLR159W	7.22388	6.01616	7.01401	5.54286	4.80011	3.93409	4.48513	3.74315	2.59647
YHR056C	18.6468	14.0383	14.1587	14.7482	15.3659	13.5349	13.671	14.3099	13.9789
R0030W	209.821	223.13	128.573	122.798	134.246	119.269	116.935	37.1331	49.1369
YAL062W	30.1895	16.7665	9.00304	7.81231	9.91047	10.0867	9.50842	4.13664	2.8696
YAL061W	14.8433	16.3381	18.6853	14.5742	9.89292	5.71949	4.8318	3.68436	2.86357
YAL060W	28.313	28.3378	25.5511	26.4456	32.7699	40.5725	38.9291	31.9505	30.8949
YAL059W	10.2884	9.4973	10.2311	10.7308	9.75411	10.3163	9.89533	9.45138	12.4508
YAL058W	5.03722	4.73444	5.19343	5.2859	5.25747	5.23813	5.30068	5.23474	5.57499
YAL056W	5.84973	5.95516	6.49575	5.75061	5.31765	4.55401	4.19695	5.21158	4.98366
YAL055W	11.1703	11.6387	9.68937	8.54442	6.58737	5.51874	6.35753	6.11916	5.42486
YAL054C	85.5913	81.0534	64.6928	49.2558	40.2668	25.2309	19.055	2.25803	1.59921
YAL053W	12.8471	14.693	18.6296	17.1294	12.8216	10.9919	11.3295	9.60144	9.15384
YAL051W	4.41317	4.19827	4.03022	3.7512	3.93746	3.47408	3.37885	4.00667	3.94009
YAL049C	26.6674	25.0116	19.2627	17.4724	14.9159	14.4597	14.9698	13.8967	13.6846
YAL048C	4.32168	4.1371	4.58747	4.04944	3.72231	3.83901	3.63452	3.58891	3.43106
YAL047C	3.67122	3.4764	3.09213	3.23852	2.86618	3.19147	3.33705	2.96599	2.85845
YAL046C	16.0958	15.0129	16.027	16.3264	18.5226	18.8784	19.1802	18.367	16.8931
YAL044W-A	28.3158	27.7114	22.9908	21.7301	19.1569	18.9567	19.6657	15.1827	14.0478
YAL044C	35.4274	38.0711	48.4218	51.5639	55.8424	52.4379	52.0874	54.4487	60.2041
YAL043C	5.65316	5.69917	5.97255	6.07356	6.83011	6.86631	6.48005	6.83572	6.85256
YAL042W	14.5196	17.0163	20.8714	22.2264	24.884	24.7982	24.7238	24.5262	27.2301
YAL041W	4.63699	4.97031	5.64655	5.96843	6.11103	6.64123	5.96573	6.92784	6.61372
YAL040C	5.66549	5.8748	5.02997	5.74522	6.40084	7.44175	9.56883	10.3975	9.4876
YAL039C	17.0828	16.4789	14.6019	13.2625	14.7499	14.7016	18.1619	18.0142	19.1712
YAL038W	130.675	151.553	137.794	105.87	59.068	41.3207	37.9101	37.1892	48.6966
YAL037W	5.13516	4.52254	3.34393	3.53887	3.46113	2.93219	2.31314	2.78202	3.14222
YAL036C	7.70251	8.06828	7.74497	8.75752	9.28558	10.6955	10.9234	11.0375	11.5615
YAL035W	10.9059	11.4681	13.4208	15.0131	18.5391	19.8164	18.6826	21.9791	22.8885
YAL034W-A	4.46609	4.4025	4.3961	4.77827	4.75353	4.9827	4.82657	3.95685	3.81947
YAL034C	16.5051	16.2509	13.6839	10.498	5.43704	3.21735	3.35882	3.21966	2.87844
YAL033W	9.71781	8.84017	8.37599	8.86107	8.0607	9.41449	11.0913	10.8664	15.2489
YAL032C	7.51781	7.41503	7.08134	6.89194	6.77151	6.62643	6.5856	5.20765	5.16498
YAL031C	3.63084	4.00308	4.6524	4.54966	4.55011	4.48195	4.49566	4.61006	4.64521
YAL030W	32.3173	31.821	29.4207	25.2259	17.4669	13.7472	13.1496	11.932	11.3318
YAL029C	2.50445	2.33411	2.82378	3.6856	4.85234	5.71721	6.12384	6.21133	6.52353
YAL028W	3.34007	3.38939	2.464	2.04769	1.32128	1.18809	1.27948	1.21957	1.11649
YAL027W	10.3369	10.349	8.1471	6.83359	6.57041	6.38773	6.75644	5.60037	5.3086
YAL026C	3.33128	3.34082	3.86876	4.12301	4.38002	4.0945	4.23286	4.64054	4.86949
YAL025C	8.9417	9.96367	12.0498	14.3715	16.9073	18.616	21.2427	21.1432	22.4308
YAL024C	1.43061	1.68579	1.73113	2.18118	2.53507	2.72388	2.15865	3.12726	2.93577
YAL023C	8.2811	9.61291	13.9888	15.556	18.5681	18.9749	18.3777	21.3738	22.8979
YAL022C	6.55282	6.40833	6.52661	7.03809	7.77231	8.01565	7.58428	6.93923	7.33638
YAL021C	7.48076	7.90369	8.12358	8.40374	9.53829	8.95978	9.42883	8.03368	8.70065
YAL020C	8.3365	6.47777	6.37665	5.59605	5.62693	5.1936	5.40674	5.41898	6.81612
YAL019W	2.91569	3.30891	3.7688	4.30218	5.20958	5.96465	5.68356	7.20984	7.49331
YAL018C	4.79376	2.37262	0.39692	0.408761	0.478569	0.919165	1.80627	0.848531	0.451606
YAL017W	5.36548	5.54442	5.81728	5.15789	4.67696	3.89527	3.88456	4.72632	4.35576
YAL016W	16.0021	17.2447	16.4289	14.9667	12.6159	11.8662	10.7334	9.8981	9.26654
YAL015C	7.72606	7.70585	7.33124	7.1866	7.10253	6.4745	7.27095	6.40038	6.25709
YAL014C	11.1937	10.2186	9.24357	8.81162	8.57106	7.80524	8.15975	7.93912	8.92583
YAL013W	8.91679	8.26281	8.50422	8.26009	9.43508	8.37385	8.91333	8.12058	8.61368
YAL012W	15.6924	20.7961	21.6708	26.1408	35.5417	35.687	36.3034	37.1028	41.7946
YAL011W	4.04721	4.28857	4.39722	4.19833	4.45507	4.73718	4.60541	4.35029	4.01561
YAL010C	4.90505	5.22421	4.34943	3.96803	3.54517	3.3136	3.86349	3.40098	3.14106
YAL009W	8.88861	8.47253	8.26899	7.68104	7.74384	6.79159	6.54459	5.85479	5.59543
YAL008W	25.7336	24.6914	19.9502	14.8146	11.0034	7.80959	7.79584	7.54125	6.9498
YAL007C	9.30787	10.3519	13.2038	15.7035	17.9531	21.8145	23.5059	22.4461	21.4856
YAL003W	82.0882	86.0073	89.0466	91.4826	96.3167	105.385	98.5317	109.708	116.232
YAL002W	3.52416	3.51822	3.39859	3.36389	3.29505	3.19403	3.37036	3.69929	3.42917
YAL001C	4.15607	4.24066	4.55049	4.32948	4.34038	4.08006	3.75038	4.32975	3.96416
YAR002W	5.54584	6.13381	6.13983	6.97494	6.96217	7.84622	8.51663	8.46026	9.23325
YAR002C-A	26.4997	28.5795	31.732	34.0571	33.4333	34.7236	34.4197	34.9026	35.5397
YAR003W	5.39029	5.17839	5.38858	5.2921	5.17584	5.84711	5.34784	5.56397	6.16296
YAR007C	9.16988	9.40881	9.44655	9.48117	8.51486	8.14811	7.44176	6.37392	6.31153
YAR008W	6.12971	6.23329	5.1863	5.64436	6.52221	6.71068	6.63329	6.29508	6.43566
YAR014C	7.61568	7.58863	7.05362	7.33705	8.4511	9.05626	9.75513	8.9605	9.17482
YAR015W	18.4698	22.3446	26.5646	32.6509	40.8058	41.3322	44.9062	38.4674	39.9235
YAR018C	2.91036	3.46259	3.75816	4.46532	5.9925	6.86808	7.79173	7.72457	7.61137
YAR019C	2.35966	2.50518	2.69934	2.59944	2.64445	2.82697	2.61632	2.87223	2.71499
YAR023C	4.38598	4.19766	3.16124	2.85826	2.42716	1.97285	1.55586	1.64419	1.70379
YAR027W	13.0799	13.8355	13.6649	12.4565	9.40073	8.03212	7.29308	6.80236	6.95419
YAR028W	1.78979	2.43204	2.26306	2.3497	2.55177	3.06025	3.29662	3.58033	3.15587
YAR029W	1.69905	1.22769	1.10805	1.34234	2.00187	1.90303	2.16554	2.43	2.03418
YAR033W	4.08318	3.93382	3.23782	3.24403	3.49503	3.47323	3.31165	3.29485	3.05145
YAR042W	4.87672	4.67426	5.21584	4.84196	5.67595	5.7988	5.79188	6.70723	6.89079
YJL219W	5.09911	4.11152	2.5044	1.96858	1.75703	1.70227	1.8869	1.73729	1.66594
YJL218W	2.09419	1.98203	1.66302	1.46439	1.80263	2.35502	3.27562	4.14762	4.47547
YJL217W	24.2191	22.8169	19.6553	21.3765	26.7937	32.863	37.6652	22.4405	18.7366
YJL216C	8.96864	6.97211	4.15433	3.57802	4.59367	5.41861	5.70565	2.67527	1.73052
YJL214W	3.22984	2.21855	1.50793	1.37239	1.65084	2.11252	2.16675	2.05633	1.83331
YJL213W	2.59171	2.41643	3.47881	5.34812	9.50741	13.2187	14.0139	11.8977	13.2123
YJL212C	2.9396	2.81324	2.3786	1.98635	1.90754	1.99171	2.01448	2.446	3.08349
YJL210W	16.0146	17.1928	17.2303	15.3456	12.7339	10.5269	9.55464	7.66767	7.38574
YJL209W	2.57145	2.75785	3.52177	4.34692	5.21055	5.80763	6.13765	7.60391	7.64697
YJL208C	4.83811	5.2376	6.91848	9.00785	11.6764	14.0544	18.6958	18.3999	18.288
YJL207C	2.28368	2.13597	1.97127	2.21667	2.62503	2.68784	2.59726	3.46649	3.56634
YJL206C	3.83567	3.8149	3.66661	3.39903	3.11955	2.66174	2.62731	2.38865	1.972
YJL205C	24.1877	20.1098	17.7705	17.2762	13.9644	14.4296	15.9326	16.5634	15.6922
YJL204C	2.93042	3.03992	3.00699	2.77112	2.62205	2.75942	2.49296	2.50759	2.3511
YJL203W	6.32962	6.15336	6.42737	6.55815	6.54648	6.62122	7.51408	6.42993	6.51292
YJL201W	6.30904	5.72204	5.37887	4.90511	5.48744	5.66331	6.16412	6.23824	5.94841
YJL200C	8.9401	13.5339	20.0633	22.8372	24.7707	26.3989	27.1188	28.384	31.6515
YJL199C	8.28813	8.35655	8.18817	7.31299	5.31732	4.04611	4.24797	3.44637	4.13556
YJL198W	3.59707	4.07862	4.87522	5.69694	6.32421	6.30049	5.50742	4.97243	5.68667
YJL197W	3.29624	3.47159	3.67604	3.856	4.45718	4.4518	4.15271	5.31774	5.54556
YJL196C	14.9816	14.3047	12.0525	11.4246	11.9078	12.0854	13.4527	20.2165	20.3431
YJL194W	3.14099	2.84122	2.51832	3.14094	3.42781	4.28886	4.20153	4.89209	5.34715
YJL193W	3.10676	2.96962	3.79281	4.7258	4.88161	4.78239	4.84246	5.35215	5.87564
YJL192C	12.1949	13.5503	15.2436	15.7264	16.9043	17.7934	21.4235	19.691	21.0579
YJL191W	49.7623	48.9312	43.6412	42.9127	45.986	51.7516	47.5422	60.2833	57.8209
YJL190C	50.5232	57.6564	62.8645	75.1935	90.7964	110.697	95.288	123.634	145.303
YJL189W	261.607	299.704	331.008	362.719	377.673	482.341	366.877	504.359	626.413
YJL187C	3.87139	4.27466	4.68605	5.37816	6.78443	7.49418	5.87773	7.48581	6.46513
YJL186W	10.5212	10.6807	10.3861	11.6277	13.2745	14.0781	13.6783	10.3321	10.0787
YJL185C	15.468	14.8736	10.3188	8.46549	5.30583	3.6108	3.32995	2.48554	1.97782
YJL184W	14.2735	14.6983	15.937	14.6351	16.5362	16.413	16.9987	14.8784	15.1851
YJL183W	9.385	10.097	12.2846	13.4622	14.5402	15.9674	15.3168	16.5219	16.8677
YJL181W	3.30443	2.47605	2.23344	2.07694	2.2229	2.85191	3.21209	3.76239	3.21949
YJL180C	9.18805	8.9288	9.48365	11.3774	13.3155	15.4887	18.6276	20.1683	20.226
YJL179W	12.2572	10.8608	10.5533	11.0601	10.7144	11.6402	12.2175	10.9454	12.4105
YJL178C	15.7096	17.1258	16.6541	16.0146	12.9406	13.2505	12.1261	12.992	12.9491
YJL177W	46.6293	50.6452	53.2021	59.4769	67.4199	77.8186	68.7466	82.7321	90.6579
YJL176C	4.71532	5.2889	6.71093	7.02201	8.0038	8.39173	7.96384	7.9373	7.50914
YJL174W	23.7394	26.912	32.5454	31.2232	30.6359	27.2524	25.9893	24.1561	26.1613
YJL173C	33.2339	33.1929	29.286	25.8253	22.8682	22.2803	18.1995	18.2199	18.4616
YJL172W	8.39069	8.99238	9.89471	10.1802	10.2523	9.54323	9.3631	7.50653	7.61511
YJL171C	6.75258	7.28266	8.8436	8.78101	8.49081	6.81315	6.86278	7.45493	8.32503
YJL170C	8.55973	5.93099	3.16243	2.54315	3.1987	2.83958	2.57162	2.90341	3.07453
YJL168C	2.88915	3.3811	4.71099	5.46587	6.01225	7.74897	7.34601	8.49361	8.20843
YJL167W	28.7378	35.6908	47.2422	49.7506	52.0228	47.5813	47.3884	45.1206	48.7178
YJL166W	74.5068	81.9983	90.1817	97.3894	99.0029	106.894	93.0875	105.807	103.132
YJL165C	5.25614	5.72138	6.68596	6.23395	5.54033	5.02461	4.85953	6.19342	5.87058
YJL164C	7.58575	7.2529	5.69167	4.44988	2.66438	1.886	2.00492	2.06866	1.9518
YJL163C	13.1378	13.3558	10.742	7.80205	4.0193	2.20389	1.82246	1.98005	1.75031
YJL162C	3.20017	2.84704	2.7112	2.72769	2.44234	2.78939	2.73164	2.50416	2.54958
YJL161W	14.5454	16.1152	13.4904	9.70078	4.03888	2.00632	2.02727	2.0664	1.37206
YJL160C	1.97204	2.24086	1.92304	1.70164	1.81685	1.85436	1.48905	1.14336	1.02629
YJL158C	17.1557	26.433	38.1745	43.3011	52.0845	49.8806	46.2732	50.6681	52.3612
YJL157C	3.79775	3.57115	3.31006	3.87739	4.77234	5.6732	7.29802	12.5742	13.1062
YJL156C	5.3005	5.39717	5.94296	6.3215	7.41421	7.24857	7.26247	7.15267	6.54991
YJL155C	11.3936	10.6348	9.2818	7.54752	5.6582	5.19541	4.81198	4.55102	3.90783
YJL154C	5.52175	6.0843	6.25042	5.81738	5.09573	4.63852	4.58459	4.82367	4.75907
YJL153C	20.2179	31.2232	33.7234	26.9809	26.3752	27.4115	37.237	24.8417	17.0926
YJL151C	46.8097	45.0683	47.0305	43.2502	38.1887	31.8903	34.448	34.9019	37.1538
YJL149W	6.97496	7.32217	6.38098	5.53288	3.98809	3.53765	3.88176	3.45421	3.07778
YJL148W	9.36745	9.87519	10.8686	12.9641	14.9927	17.4071	17.7958	18.5317	20.5495
YJL147C	4.34653	4.43467	4.595	4.37053	3.61965	3.66294	3.92583	3.70082	3.29258
YJL146W	6.51016	6.78684	5.78976	5.56386	5.26764	5.13587	5.71539	5.26471	4.81873
YJL145W	9.57211	8.95504	8.59328	9.97061	12.2608	11.975	12.7568	11.2647	12.1945
YJL144W	53.0168	58.3143	50.94	32.875	10.9053	2.9016	2.66326	2.00153	2.14055
YJL143W	22.9499	19.9588	22.3441	24.5308	30.2616	30.6734	36.6642	36.9155	41.7584
YJL141C	10.1937	11.488	11.9933	10.2032	6.80822	5.3569	5.02056	4.97804	4.35612
YJL140W	26.0017	25.3043	24.7258	24.6492	24.1504	24.5921	25.9297	23.9347	26.881
YJL139C	6.5312	6.28504	6.23141	6.44954	6.45948	6.26414	7.29252	6.75423	6.2533
YJL138C	32.9261	38.9661	40.7087	45.8327	52.9966	55.0711	57.5798	56.9871	59.8599
YJL137C	12.8054	12.0744	8.60233	7.20516	6.63561	6.16516	7.64093	6.85721	5.79737
YJL136C	79.5827	89.1731	93.9477	107.196	117.915	142.968	131.712	156.451	174.083
YJL134W	7.83399	7.6747	7.87124	8.43483	8.4157	8.39655	7.63348	9.02969	10.4237
YJL133C-A	138.089	85.5456	75.6077	85.2676	109.504	116.915	113.884	101.973	102
YJL133W	5.52732	5.51093	5.90934	6.34987	7.744	8.28745	9.33941	8.88949	8.79572
YJL132W	5.82345	5.44633	4.43134	3.4264	2.05795	1.64936	1.66435	1.7004	1.33268
YJL131C	6.24273	6.0819	5.50594	5.70675	5.94385	6.49707	8.67515	8.25007	7.17008
YJL130C	12.95	12.5579	11.4803	12.1293	14.3496	13.2853	11.9145	14.7632	16.873
YJL129C	3.83046	3.54911	4.07508	4.64032	4.97373	5.18804	5.21439	6.12239	6.40707
YJL128C	5.50768	5.97515	6.56455	6.14637	5.84908	5.66741	6.39449	6.6942	7.19599
YJL127C	3.38364	3.27182	3.36734	3.40867	3.73858	3.56488	3.65119	3.87296	3.7264
YJL126W	6.47821	6.03704	4.98816	5.0818	4.576	4.46218	4.39045	3.86382	3.96776
YJL125C	7.57766	8.43707	8.07531	8.65944	9.70247	10.1926	9.62879	9.6874	10.4154
YJL124C	14.2156	14.1601	14.6685	14.746	17.4	18.6993	20.8199	19.0404	18.4162
YJL123C	15.789	15.9939	16.1182	15.0189	13.8359	13.5465	13.2327	12.7118	12.5511
YJL122W	11.4873	13.2277	15.23	17.0894	18.6606	19.8375	21.3107	18.7268	20.361
YJL121C	18.7185	18.7257	18.7322	19.3521	22.6427	22.6082	23.0033	21.0306	20.7497
YJL117W	16.3527	16.8948	16.9142	16.4054	15.7332	13.6099	14.5447	14.5812	14.9269
YJL116C	63.6939	49.8008	21.2716	13.4258	6.49351	2.86971	2.54642	2.17127	2.03958
YJL115W	15.977	15.8429	15.5294	13.8338	14.0448	12.6792	12.6197	11.9889	12.0934
YJL112W	6.01883	6.61235	7.80353	8.08955	9.86101	10.9655	12.4744	13.1338	11.9602
YJL111W	15.8116	17.2217	18.5961	18.8423	18.1619	18.8556	19.4637	19.1254	18.9875
YJL110C	5.59259	6.27071	6.71428	6.95328	7.66891	8.45036	8.12266	8.25296	8.1014
YJL109C	2.90673	3.29815	3.77332	4.88429	6.26219	6.56872	6.39761	7.36083	7.95726
YJL107C	2.94976	2.88985	2.59461	2.24341	2.13409	1.97805	2.06055	2.71129	2.68891
YJL106W	2.54387	2.27296	2.04039	1.70835	1.28519	1.08947	1.35847	1.13459	1.10193
YJL105W	2.49879	3.40007	6.06364	4.90482	2.9092	1.91574	2.18445	2.16689	1.82288
YJL104W	12.4134	12.7103	14.2003	17.6173	20.9643	25.0873	34.7258	34.7785	36.1109
YJL103C	9.81165	9.51999	8.39577	7.54246	6.72047	7.09516	7.7037	7.19612	6.1213
YJL102W	4.4621	4.77868	5.59691	5.74576	7.06344	7.81151	8.87853	9.14506	8.24731
YJL101C	10.5456	12.1093	12.6452	11.5312	10.0342	9.01131	8.58442	9.95376	10.8353
YJL100W	5.81877	6.51812	6.29665	6.57055	7.42602	7.02409	6.98818	6.94707	6.72198
YJL099W	4.16129	4.00063	3.52491	3.42268	3.3335	3.12697	3.34769	3.11191	3.19456
YJL098W	4.89328	4.82299	5.02359	5.57973	6.04817	6.42699	6.34753	7.16351	6.86213
YJL097W	11.4212	12.9736	13.7389	15.3304	16.5161	16.861	15.8556	15.7825	16.248
YJL096W	14.505	14.1721	17.2234	21.1027	23.8765	30.3242	37.4932	40.6027	42.0949
YJL095W	4.82898	4.81579	3.76111	3.82713	4.71723	3.81372	3.21986	4.13172	4.10179
YJL094C	5.78193	5.83169	6.76008	6.76149	5.50599	4.24804	3.64447	4.4504	4.154
YJL093C	5.27276	5.53985	5.54715	5.52464	4.97166	5.1734	5.0098	4.86065	4.91067
YJL092W	3.3386	3.60658	4.20317	4.18293	4.41	4.34822	3.89453	4.36887	4.28753
YJL091C	5.96015	5.66857	6.60083	6.2364	7.02422	6.25253	6.49936	6.65271	5.9302
YJL090C	3.2857	3.6121	3.49195	3.69315	3.92386	4.09534	4.21199	4.48295	4.19405
YJL089W	7.774	6.75199	5.07178	4.38056	2.48688	1.26911	1.22818	0.941636	0.555782
YJL088W	19.2042	28.611	42.5514	45.85	39.7333	42.4155	45.6687	40.8786	40.7408
YJL087C	2.62807	2.69438	3.28432	3.6105	3.8278	4.48859	4.11305	5.12954	4.8499
YJL085W	4.86644	4.83793	4.51353	4.60559	4.52721	4.78767	4.88724	4.66334	4.48498
YJL084C	6.12791	5.33827	4.16127	3.70606	3.23098	3.19382	2.93572	3.07004	2.67582
YJL083W	2.68144	2.70722	2.45395	2.51195	2.37417	2.70109	2.52616	2.74781	2.32699
YJL082W	10.7808	11.0156	9.59269	8.35024	7.19073	6.30589	5.53724	5.14241	4.92829
YJL081C	9.91793	9.93423	10.2548	10.7281	10.6972	11.7154	11.6414	10.2774	9.2644
YJL080C	7.68131	8.03399	8.09033	9.18855	11.1421	11.1636	10.5583	13.0468	12.7763
YJL079C	20.6677	27.9819	35.5905	34.6229	36.2734	27.1206	22.1013	21.6983	19.8323
YJL078C	5.74816	6.51524	8.62558	8.18819	9.32762	9.05314	10.0627	11.6811	12.37
YJL076W	3.82482	4.15352	5.63647	6.09042	7.55094	8.23343	8.62993	10.0814	10.0694
YJL074C	4.8153	4.49077	3.71135	3.88359	4.80045	4.82883	4.53871	4.82123	4.26312
YJL073W	5.07732	4.51022	4.9661	5.06661	5.31071	5.48654	5.46201	5.80518	5.58493
YJL072C	8.63662	8.69936	7.86422	8.46603	7.64187	8.03053	7.67022	7.43515	7.54158
YJL071W	5.37695	5.86995	6.65382	6.75525	6.27728	6.23317	6.51569	6.3	6.27207
YJL070C	4.11263	4.35158	4.26211	3.91302	3.13557	2.85847	2.61101	2.65195	2.26451
YJL069C	3.75018	4.53203	5.87449	6.91976	7.59823	9.38137	9.54591	9.18038	9.89089
YJL068C	20.6091	20.9325	17.7556	15.3271	12.3602	10.294	9.73534	8.11868	8.25552
YJL066C	36.3146	31.2721	23.6731	20.6518	18.8797	17.5634	19.3232	15.4322	13.0563
YJL065C	9.92159	10.3718	10.9572	10.7543	11.6998	10.8752	10.9836	10.8243	11.2648
YJL063C	12.8164	12.678	15.4329	18.4464	24.9972	28.6783	38.9963	43.8919	46.2467
YJL062W-A	30.0291	27.1276	30.0893	32.6493	36.3639	38.0572	40.7723	43.655	46.2744
YJL062W	3.63699	4.00648	4.85209	4.90682	5.28551	5.21726	5.42613	5.72173	6.10509
YJL061W	3.78892	4.34702	4.25778	5.03093	5.44511	6.20362	6.29077	6.03284	6.04055
YJL060W	15.215	16.9574	18.3931	19.1166	17.8925	17.0294	17.06	16.4765	17.7391
YJL059W	6.45304	5.83629	4.82454	4.60266	3.71905	3.56542	3.40487	3.70692	3.51601
YJL058C	2.12801	2.22574	2.34861	2.38799	2.63443	2.68109	2.75964	2.53257	2.81885
YJL057C	10.1162	10.8347	11.0023	8.92283	5.51196	3.51348	3.11622	3.09306	2.81013
YJL056C	3.15029	3.51975	4.01512	4.2199	3.96456	4.32822	4.39428	4.86214	5.67565
YJL055W	23.7599	24.4653	24.7533	23.0625	22.2862	22.1313	23.5731	21.4218	22.1881
YJL054W	9.34405	10.0912	10.565	10.7844	12.8445	13.6429	16.402	15.7792	16.0541
YJL053W	9.69429	9.78261	8.32967	7.57459	6.37431	5.9665	6.32308	5.46318	4.81843
YJL052W	74.4458	102.895	102.261	80.1691	26.0214	7.67816	6.33672	5.95727	4.48054
YJL051W	3.94612	3.32809	3.05328	3.35528	4.26907	5.31376	6.45676	7.37953	7.84118
YJL050W	4.08494	4.6199	5.68484	6.85105	8.13316	8.87901	8.53647	10.0967	10.6722
YJL049W	6.63381	6.46566	6.36377	6.45945	6.13082	6.5786	6.27307	5.99493	5.86595
YJL048C	27.0966	31.6404	31.546	28.7035	21.0307	15.9178	14.9331	10.3448	8.73337
YJL047C	3.56801	3.59494	3.13894	3.03003	2.66866	2.78611	2.76508	2.85782	2.61533
YJL046W	5.22542	4.90953	5.07559	5.63772	6.92284	7.80738	11.7179	11.6955	10.6896
YJL045W	22.3577	20.7455	14.6136	9.38956	3.09243	1.23656	1.27313	1.27453	0.921499
YJL044C	6.89695	7.27362	7.12973	7.91196	7.80677	8.17748	8.23989	7.96979	7.92042
YJL043W	1.7843	1.23422	1.28125	0.88885	0.900254	0.775218	0.997345	1.0117	0.814865
YJL042W	5.93184	6.31322	6.88881	6.63076	6.46636	5.43532	6.14818	6.57037	6.44043
YJL041W	11.2999	11.3295	10.365	10.6824	10.2055	10.4732	9.60752	9.65952	10.2854
YJL039C	2.80285	3.0283	3.10196	3.39779	3.93749	3.96742	4.06385	4.44504	4.19991
YJL038C	6.02212	5.13744	2.9389	2.49714	2.09307	2.2007	1.90516	1.35358	1.0084
YJL037W	5.52038	4.99702	3.0962	2.65126	2.66283	2.88624	1.97266	0.765889	0.57243
YJL036W	12.1799	13.1325	12.3598	10.8287	7.57116	6.1666	6.62805	5.65011	5.43319
YJL035C	4.37762	4.12421	4.08931	4.10865	4.02795	3.90173	3.77494	4.38062	4.81686
YJL034W	35.4519	39.7272	43.3309	39.5725	32.334	26.9566	27.6064	35.6977	35.8049
YJL033W	5.33299	5.56086	6.07476	7.15881	7.71536	7.8583	7.53294	7.75264	8.0838
YJL031C	10.6355	10.3822	9.33274	9.5028	8.03783	8.64191	8.70329	10.1872	10.5627
YJL030W	11.5671	11.1432	11.5352	9.8883	9.19759	8.50623	8.56168	7.88915	7.80043
YJL029C	4.15337	4.39699	4.56887	4.39283	4.31304	4.46331	4.71285	4.7161	4.65904
YJL026W	39.7972	59.4801	65.8657	54.691	28.5754	18.1278	12.703	9.27694	9.53027
YJL025W	2.72263	2.35525	2.186	2.36634	2.53115	3.40929	3.24882	3.62971	3.42693
YJL024C	13.5893	12.6027	11.343	10.9328	9.79584	9.00246	10.6752	9.52335	10.1015
YJL023C	7.68442	8.15804	7.13366	6.28249	5.53864	5.14709	4.62279	4.19203	3.46978
YJL020C	8.31443	8.6579	10.4731	10.0132	9.65447	8.69544	8.40908	8.34861	7.88243
YJL019W	3.44898	3.15846	3.78904	3.84316	3.93885	3.87378	3.6381	3.67663	3.91533
YJL016W	8.99601	11.6539	15.5655	11.0686	4.64971	2.37824	2.34156	2.80964	2.94974
YJL014W	15.7616	16.9	17.9938	18.8663	19.1305	19.7033	20.6944	19.3191	20.454
YJL013C	6.71283	7.30197	6.28914	5.8621	5.32179	5.60622	6.136	5.3791	4.72347
YJL012C	8.12786	8.88489	8.93537	9.60078	9.33178	9.00456	8.60742	9.37361	9.70669
YJL011C	5.94985	5.60062	7.06115	7.87684	6.97049	8.36728	8.51741	8.2123	12.5745
YJL010C	4.44114	4.78872	4.96363	5.69568	5.84115	6.28148	6.11136	6.10086	6.16861
YJL008C	16.4139	17.2731	18.4522	18.1357	19.0821	18.5595	18.1316	17.8815	19.2389
YJL006C	4.50038	5.06996	4.84997	5.33913	4.52004	4.50093	4.51849	4.25282	4.0584
YJL005W	3.85383	3.62977	3.31665	3.0522	2.98014	2.55989	2.76485	3.8844	3.86496
YJL004C	10.6469	11.4472	9.96022	8.9148	6.17485	6.79515	6.80454	6.35242	5.97059
YJL003W	12.9393	11.9295	10.9387	11.0011	9.51593	9.57247	9.98862	9.2181	8.38112
YJL002C	14.912	16.337	18.5722	19.5329	19.039	18.6728	19.194	20.7058	22.5514
YJL001W	31.6489	33.9778	36.465	31.9735	26.5162	23.6039	22.6494	22.9672	25.638
YJR001W	8.11404	9.41882	10.5664	11.1215	12.0313	11.6496	11.0578	12.0758	12.5651
YJR002W	7.20126	7.70482	7.99637	8.61281	9.12695	10.0361	9.71428	9.2122	9.85732
YJR003C	5.3125	5.62106	5.37566	5.22723	4.85943	5.44292	6.26545	5.87119	5.55382
YJR004C	6.45606	5.4345	4.74284	4.09506	3.87259	3.59755	3.81388	3.7619	3.55373
YJR005W	4.85123	4.71909	5.94936	6.33657	6.67437	7.54382	7.50096	6.48583	5.77704
YJR005C-A	7.04255	5.35712	4.69259	3.25646	1.25905	0.410509	0.179497	0.664931	0.479292
YJR006W	7.42871	7.5901	7.47187	7.30863	7.55667	8.252	8.55521	7.83299	8.33272
YJR007W	15.3267	16.2517	16.63	18.1495	21.0705	21.348	21.8643	19.516	19.7168
YJR008W	38.9024	42.0452	32.9072	24.4547	14.2251	10.2782	9.89518	6.25569	4.99976
YJR009C	88.1068	102.436	85.1192	68.2086	38.3219	28.2337	28.1869	37.9034	43.7443
YJR010W	16.2601	21.2477	22.5858	28.3496	41.179	46.5521	49.8066	50.0868	54.0923
YJR010C-A	7.488	8.66457	9.5498	9.84335	10.7873	9.6657	8.79954	8.96043	7.9557
YJR011C	7.45232	7.35561	6.88752	6.17542	5.02899	5.27015	4.58242	4.99534	6.70398
YJR012C	11.2485	11.9113	10.3797	9.19668	9.1634	7.96158	8.27504	7.4292	7.27368
YJR013W	6.3745	6.77121	7.13698	7.49536	7.22418	7.66005	7.46093	7.06895	6.53642
YJR014W	17.7098	18.2483	17.4337	18.5048	19.9015	19.9565	20.7852	17.7931	19.2689
YJR015W	7.40176	7.97964	8.92554	9.33758	9.45874	8.37334	8.20326	10.6668	12.6465
YJR016C	21.9756	29.2486	37.5202	39.7282	41.6721	36.9227	38.0846	37.6383	41.1773
YJR017C	18.2083	16.5073	17.9224	16.3297	18.5097	18.9798	20.3052	17.823	17.0095
YJR019C	25.4216	28.0411	24.6705	23.4282	25.7246	22.8498	27.4778	10.7873	8.21777
YJR021C	8.0329	6.9776	6.58853	6.06357	6.0164	5.23232	5.49804	4.50274	4.23697
YJR022W	7.40611	7.43333	6.84502	7.32395	5.80369	6.20563	5.78669	6.75139	6.69526
YJR024C	18.8649	18.6114	18.8844	18.3976	16.7795	16.1067	14.0968	13.8035	16.6615
YJR025C	23.1214	28.0362	39.2708	39.7542	31.0798	25.2495	24.1709	21.9604	22.1549
YJR030C	2.94473	3.27012	3.42773	3.83365	4.95885	5.31998	5.26253	5.63104	5.06772
YJR031C	3.03935	2.49305	2.19798	2.51496	2.58146	2.85288	2.85996	3.18189	3.07574
YJR032W	5.97309	6.44983	5.98185	6.42593	5.97187	6.85742	7.12704	7.18324	6.83175
YJR033C	3.56506	3.4683	3.44404	3.24089	3.08257	2.72347	2.68575	2.86503	2.85544
YJR034W	13.4675	12.2937	12.6759	13.0155	13.9906	15.9495	17.5077	18.779	18.6657
YJR035W	3.45259	3.35143	3.60788	3.28311	2.88301	2.72738	2.63279	2.96147	2.70713
YJR036C	2.63293	2.47179	2.32629	2.19163	1.62296	1.2608	1.25283	1.29256	1.11529
YJR039W	3.79222	3.60972	3.31902	2.92713	2.41948	2.17559	2.03754	2.0587	1.80144
YJR040W	3.32079	3.78928	4.76482	5.22833	5.13365	4.97189	4.50321	5.14218	4.09787
YJR041C	1.53784	1.92403	2.3593	2.96243	3.34798	3.86755	4.03161	4.14556	4.39013
YJR042W	5.95346	6.50602	7.43478	8.07549	8.78739	9.47496	10.1506	9.98611	9.77414
YJR043C	3.86251	4.94884	5.3692	5.77744	6.48722	6.44669	7.33793	6.13281	6.35203
YJR044C	23.8355	24.9333	25.0864	23.7166	21.928	19.9574	22.1023	18.2636	18.5004
YJR045C	59.2594	55.1448	53.0579	51.629	58.5896	60.5583	69.5172	73.3624	73.3936
YJR046W	9.45853	9.23035	8.11232	7.1554	5.5201	4.8542	5.04495	5.23784	5.67501
YJR047C	1.69577	0.932991	0.64577	0.804667	0.417086	0.458843	0.517473	0.422764	0.306223
YJR048W	51.5126	57.4163	88.5642	126.817	205.099	271.852	345.231	379.533	381.138
YJR049C	8.67615	8.26226	7.29135	6.57211	5.38397	5.18677	5.5274	5.02249	4.55167
YJR050W	6.83037	7.2339	6.80679	6.02341	5.35517	4.97404	5.35248	4.60867	4.79776
YJR051W	10.067	10.0247	8.85779	8.5336	8.04545	7.35811	7.43051	6.95911	6.48657
YJR052W	6.46505	6.56624	6.28032	5.30469	3.98952	3.77197	4.07776	4.03208	4.01014
YJR053W	1.46084	1.48161	1.8597	1.9812	2.45967	2.7197	2.42574	2.78078	3.11621
YJR054W	3.62318	3.61239	3.85634	4.26819	4.66228	5.49007	5.16174	5.6314	5.79816
YJR055W	5.75844	5.67138	4.75993	5.05134	4.52783	4.3823	4.18188	4.535	5.05463
YJR056C	6.3817	6.04004	4.94147	4.59711	3.77133	4.99235	5.87769	3.84149	3.4357
YJR057W	9.70968	10.024	9.76766	9.54972	9.4694	9.53012	9.71001	9.10034	9.44469
YJR058C	12.9698	13.0766	13.4342	10.7973	10.7409	10.3815	11.0912	9.1967	9.79046
YJR059W	6.7762	7.48053	8.03075	6.89673	5.93161	4.74754	4.79826	5.68464	5.93803
YJR060W	6.25955	5.79335	6.04994	5.82204	6.36756	6.34539	7.15097	5.70175	6.07493
YJR061W	7.79309	7.54019	6.51621	5.37203	4.23487	3.66152	3.25569	2.93892	2.78405
YJR062C	4.92468	4.90723	4.73945	4.66394	4.17756	4.4987	4.83796	4.69606	4.32408
YJR063W	7.61908	9.36255	11.3154	12.2975	12.9647	13.564	13.2777	12.6708	13.2216
YJR064W	14.1981	14.7671	15.7191	16.9142	16.6453	17.7736	17.2019	17.1411	17.9474
YJR065C	16.9909	18.7248	20.0439	19.2903	18.5093	17.9761	17.0567	16.5077	15.766
YJR066W	2.2309	1.97146	1.87948	1.96409	2.25648	2.08332	1.86381	2.55098	2.59963
YJR067C	11.9278	9.61723	8.80854	9.22011	9.61053	11.2802	11.9055	10.4239	10.1443
YJR068W	8.61624	8.7234	8.26724	7.88836	7.68932	7.69457	7.74486	6.92403	7.47619
YJR069C	7.35318	7.78674	9.93806	11.6498	13.5489	14.4518	14.0821	13.966	14.2149
YJR070C	12.3698	14.2785	16.2729	20.3803	26.1266	29.1961	28.202	30.5882	33.0283
YJR072C	14.3302	14.3434	13.3982	13.8871	15.69	14.9949	13.5168	12.6974	13.8224
YJR073C	39.4503	46.6908	55.9972	54.8961	51.5979	60.7037	66.0837	73.3819	78.1208
YJR074W	16.5641	19.643	21.0993	19.3702	15.4968	14.4288	13.8464	13.6674	15.5833
YJR075W	12.9956	13.5511	14.8492	14.7687	15.3148	14.3295	13.5433	14.7977	16.8724
YJR076C	11.5037	12.4049	13.085	13.637	15.7645	15.836	16.46	16.8495	17.2632
YJR077C	31.1023	40.0632	51.3995	60.7928	82.9574	85.4778	86.6538	82.772	77.991
YJR078W	11.9031	9.91001	7.76758	6.58647	6.92277	7.46683	8.36887	6.20694	5.54951
YJR080C	10.4892	11.7846	12.2644	13.6335	16.8341	19.2806	23.7723	21.2456	18.6649
YJR082C	20.0815	19.7652	15.0058	13.9232	11.883	10.8949	11.5668	9.55066	10.0622
YJR083C	5.77684	5.88837	5.52815	5.58786	5.24367	5.51163	5.11916	4.97683	4.94877
YJR084W	5.28558	5.2666	5.3622	5.64762	5.52787	5.91701	5.74071	6.314	6.12493
YJR085C	51.3916	53.7469	54.3914	47.7002	33.2784	29.3885	25.9807	24.0242	23.1434
YJR086W	22.0546	20.1652	19.8086	19.644	15.6819	17.6839	15.3626	14.9685	14.3058
YJR088C	9.84662	10.133	9.86832	10.2943	8.80625	9.78534	10.2006	8.96842	8.32511
YJR089W	4.645	4.70109	4.75317	4.60217	4.43976	4.23457	4.13772	4.23066	4.10101
YJR090C	3.79047	3.90874	4.11239	4.20226	4.52132	4.54405	4.6594	5.34949	5.54817
YJR091C	6.69045	6.78537	7.41358	6.72474	6.2291	5.76155	5.93714	6.45309	6.47015
YJR092W	2.99718	3.21416	3.31958	4.0004	5.52815	6.32908	6.521	8.08087	7.91694
YJR093C	6.16178	6.46929	6.70519	6.32046	7.06752	6.24331	7.10272	6.66391	6.53922
YJR094C	8.38724	6.56453	3.749	2.62723	1.61968	1.30216	1.36614	1.02983	0.718026
YJR094W-A	63.7273	62.9154	77.6461	86.3479	80.5568	108.829	89.1421	125.197	153.459
YJR095W	23.0771	26.1543	28.1899	28.9184	37.0798	34.1317	36.9089	8.68495	1.63948
YJR096W	30.4987	40.4352	35.7185	25.0605	10.5438	5.07143	3.6545	3.2642	2.61929
YJR097W	7.34825	6.64181	6.97736	7.59884	6.88193	8.04031	8.5431	7.64572	7.32075
YJR098C	2.47447	2.24476	2.38797	2.25214	2.39264	2.72059	2.75423	2.54236	2.80429
YJR099W	12.0679	10.8643	9.00456	8.46349	8.37121	8.14293	7.89787	5.68916	5.30911
YJR100C	9.48966	9.70151	9.52139	9.66936	9.60373	9.86583	10.8772	9.94262	9.62431
YJR101W	9.87506	9.66792	13.0106	15.9617	19.9798	23.2135	26.6064	33.404	31.4098
YJR102C	6.93162	7.20614	7.168	7.23876	5.97296	5.68643	6.13721	5.80309	5.53888
YJR103W	14.4456	12.602	9.4322	7.7168	7.05438	6.73104	7.4963	6.19114	5.43725
YJR104C	112.881	145.15	148.836	132.962	98.8787	92.1788	96.3123	117.457	113.516
YJR105W	19.1437	24.9712	32.4097	35.8619	40.8327	42.7532	41.1568	38.9307	40.6424
YJR106W	3.90262	3.59897	3.90395	3.53845	3.32106	2.79649	3.30135	3.01755	3.01339
YJR107W	7.5499	6.962	5.97433	5.76896	6.0749	5.86515	6.35344	6.21543	5.3256
YJR108W	2.88041	2.69785	1.6794	1.94424	1.42538	1.3175	1.35193	1.22083	1.05487
YJR109C	9.09349	13.8534	23.7276	23.151	15.2275	10.4074	9.86809	10.5359	11.6754
YJR110W	3.37706	3.6208	4.06693	4.11942	3.53218	3.85058	3.55657	4.17863	3.99848
YJR111C	4.65467	5.99399	8.69674	8.61645	7.00392	5.33221	5.66594	5.46364	5.81397
YJR112W	5.4874	5.64688	6.99116	7.31839	6.81193	7.00135	7.04805	7.28429	8.1467
YJR112W-A	15.2524	15.0209	14.7892	13.776	12.2564	12.6633	12.4111	11.9618	12.8369
YJR113C	19.5871	19.8973	20.2373	22.968	28.1079	29.774	32.5127	35.1635	35.6428
YJR115W	16.9956	18.4476	10.0517	5.95805	2.74908	1.2936	1.1027	1.18261	1.12302
YJR116W	8.34596	8.01747	6.90488	5.91186	5.25161	4.31574	4.21107	3.51308	3.6499
YJR117W	26.7444	26.1623	21.5919	19.3266	17.7489	16.0759	16.4859	16.5132	17.9854
YJR118C	14.1405	15.0237	14.7774	14.9594	15.0712	17.1853	16.3188	18.0857	18.5598
YJR119C	4.78022	4.61911	4.13062	3.75131	3.95782	3.75017	3.24016	3.00578	2.86617
YJR121W	47.8398	63.7093	80.7414	91.9466	118.79	126.851	136.752	132.425	121.073
YJR122W	6.5384	6.04762	7.15533	8.37456	11.004	11.9525	13.5671	10.7688	11.0465
YJR123W	100.529	119.23	129.055	144.177	162.73	186.7	159.019	186.1	198.044
YJR124C	3.37087	3.55921	4.60107	5.05732	6.10263	6.24319	6.46888	7.82596	8.75993
YJR125C	13.8367	14.0149	14.1775	13.7236	12.7833	11.6086	11.9251	9.903	9.9967
YJR126C	8.90632	9.4508	9.64187	8.73106	7.71566	6.7206	6.242	6.7205	6.99372
YJR127C	6.06299	4.77313	3.66828	3.30259	3.97223	3.56001	3.58385	5.26921	5.5254
YJR129C	4.74906	4.42502	3.6902	3.34736	3.86062	4.1233	3.99286	4.11059	3.49733
YJR130C	8.08238	9.36155	11.1062	10.5737	7.78575	6.6748	6.07398	5.77445	5.8688
YJR131W	5.00699	5.39183	5.07578	4.7879	4.06765	3.66199	3.77394	3.74531	3.85881
YJR132W	4.30452	4.48964	3.86619	4.33983	5.03591	5.0291	5.09038	5.49545	5.34089
YJR133W	13.2071	12.9998	14.332	16.0762	19.5839	24.0124	26.9768	23.4745	22.4994
YJR134C	6.45022	6.56951	6.12491	6.0567	5.813	6.009	5.83998	6.08326	5.63229
YJR135C	5.14021	4.98851	4.56804	4.23738	3.9238	3.9023	3.73858	3.78495	3.49679
YJR135W-A	26.5274	24.51	22.3228	24.9483	24.5631	31.0847	27.085	31.5525	33.8495
YJR136C	4.8469	4.6105	4.14741	4.19448	3.84683	3.4939	3.68557	3.22799	2.97948
YJR137C	11.5019	14.6017	18.9072	21.812	27.2776	28.1327	27.2015	31.0092	32.9727
YJR138W	2.97399	2.79781	2.52442	2.51583	2.61749	2.42565	2.23019	2.68843	2.55691
YJR139C	25.8617	27.6533	26.4556	28.4421	28.1512	28.1688	25.1265	25.6536	25.8649
YJR140C	2.30678	2.1291	1.99015	2.2816	2.51544	2.68002	2.65412	2.97025	2.77058
YJR141W	6.62197	6.13489	5.07635	4.86077	4.38878	4.51711	3.97689	4.13708	4.33243
YJR142W	6.47962	7.30676	8.25969	7.95724	7.53234	7.21894	6.99574	5.84582	5.27598
YJR143C	6.14942	7.12122	9.84852	11.3163	13.1452	14.0869	13.338	15.9701	16.784
YJR144W	16.2857	17.5126	17.6041	16.7663	16.8771	16.6859	16.7975	14.4897	14.9383
YJR147W	4.40008	3.90162	3.3935	3.58952	5.23206	6.47355	7.43516	6.99731	7.10495
YJR148W	21.09	18.2396	17.8403	19.1668	21.5368	22.3785	22.7798	5.90929	4.67714
YJR149W	8.28553	7.72519	5.51634	4.56352	4.80177	4.33861	6.41878	6.25749	5.56384
YJR150C	1.83042	2.66724	3.60817	2.57917	0.725217	0.172995	0.208702	0.0979424	0.0713608
YJR152W	4.82234	4.97919	4.47462	4.29399	4.44842	5.34991	4.42206	4.16689	3.63193
YJR153W	3.3238	3.15193	2.61752	2.63695	2.58995	2.7526	3.20217	3.01021	2.68016
YJR154W	3.47506	3.92112	4.19519	3.73265	3.11864	2.83708	2.50075	2.91599	2.62792
YJR155W	16.0483	16.1669	12.3264	8.62461	4.69189	3.46012	3.00971	3.36352	3.19919
YKL224C	1.06882	0.658483	0.909826	0.49804	0.354829	0.563933	0.779754	0.883111	0.660543
YKL222C	3.92018	3.53793	3.4087	3.1852	3.31289	3.28192	3.38798	3.38251	3.2813
YKL221W	9.09068	6.51448	3.08441	2.10946	0.95557	0.898442	0.867155	0.533548	0.437923
YKL220C	2.14024	1.63545	1.30402	1.16176	1.47213	1.46277	1.25332	1.36341	1.24803
YKL219W	4.8518	5.60779	6.88559	6.88047	6.72104	5.75355	5.12748	4.52338	4.11516
YKL218C	8.01758	6.80745	6.07371	5.2984	4.32486	3.06162	6.83362	9.97595	11.158
YKL217W	153.339	147.747	113.185	98.2939	112.913	95.0729	57.746	18.4797	10.5023
YKL216W	8.87766	10.0708	10.6509	12.591	14.017	15.552	16.0227	19.3904	21.8656
YKL215C	3.43771	3.66605	3.41338	3.6877	4.58021	4.29355	4.37489	4.46694	4.1713
YKL214C	12.7645	12.0853	10.607	10.7523	10.3367	10.1082	9.61103	9.07636	8.66762
YKL213C	7.64948	8.33905	8.28368	8.69041	8.25797	8.15658	8.78493	8.56608	8.80005
YKL212W	6.80828	7.55385	9.05498	10.4719	13.0358	13.598	13.9819	13.9301	14.29
YKL211C	6.19004	8.53667	14.4884	16.1025	13.1317	11.7696	12.1013	11.2466	12.1379
YKL210W	17.3131	18.8561	19.8347	18.7204	16.5253	14.4885	13.9858	13.7893	13.5961
YKL209C	4.96771	4.12501	4.52493	5.98027	8.55526	9.66093	11.9288	14.1177	15.1455
YKL208W	6.32675	6.74703	6.50512	6.906	6.80143	7.0968	6.95159	6.33332	6.24691
YKL207W	18.9715	18.9204	21.8034	20.8652	21.9777	21.8588	22.1755	20.9346	23.2666
YKL206C	8.56725	8.33219	8.51145	9.18192	8.4953	8.39997	7.76231	8.1729	8.0432
YKL205W	2.70596	2.80182	3.26947	3.97061	4.39623	5.23332	4.84913	5.89015	6.58202
YKL204W	6.19745	6.57288	7.1359	6.90498	8.50765	8.58065	9.4791	7.92737	7.70426
YKL203C	2.28868	2.0846	2.02127	2.07262	2.3941	2.1017	2.05576	2.53786	2.56847
YKL201C	7.59813	7.25479	7.24903	7.10378	7.51572	7.02436	6.34383	6.78249	5.98809
YKL198C	6.72423	6.97728	6.46065	5.44592	4.89604	3.77823	3.64375	3.47678	3.40701
YKL197C	3.83534	3.80464	3.62652	3.36888	3.2915	2.74808	2.9693	2.38918	2.36699
YKL196C	33.9396	32.0869	31.0316	28.5005	23.4736	24.1428	25.2086	23.3259	31.1017
YKL195W	25.8611	26.3028	30.0967	29.4792	31.9876	32.1856	41.952	37.552	37.3641
YKL194C	4.01825	4.33562	5.20379	6.16231	7.85323	8.56287	10.8407	10.5913	10.2389
YKL192C	34.2175	38.6122	39.6847	42.3977	46.3852	49.1101	57.1118	61.0471	60.9715
YKL191W	8.14944	8.10477	8.23984	8.5322	9.68994	9.91397	10.6823	9.6951	10.4686
YKL190W	20.3391	20.8858	22.3204	21.1841	18.6072	17.7806	19.117	17.7279	17.95
YKL189W	6.24423	6.14037	5.41229	4.71884	4.43778	4.26478	4.62862	4.08804	3.85601
YKL188C	10.366	10.6085	8.45582	7.08308	5.63263	4.78076	4.39843	1.95923	1.60104
YKL187C	33.1254	39.2642	28.7688	17.5715	10.2257	4.41658	3.922	1.78666	1.53473
YKL186C	19.0255	17.8986	19.0291	16.6592	14.8104	13.2773	14.0415	13.5097	14.2865
YKL185W	9.6437	9.46498	8.64031	8.56802	9.06631	10.0915	12.3288	13.0722	12.8595
YKL184W	6.48498	6.33327	6.04749	6.0979	7.42999	7.85626	8.18042	8.24595	7.46481
YKL183W	5.91983	4.61675	4.6143	5.05041	6.26822	6.92308	6.90397	7.69289	8.66411
YKL182W	20.767	30.7231	34.5282	30.9836	25.2913	19.7966	17.3433	16.2649	15.217
YKL181W	13.5334	16.1503	17.7665	20.386	22.5542	24.4956	23.1572	20.4882	22.2507
YKL180W	56.2907	63.3632	65.9608	77.4673	89.2701	106.28	101.364	116.522	124.388
YKL179C	5.82413	6.2498	5.94714	6.42633	6.27575	6.86281	6.30369	6.79885	6.25878
YKL178C	5.30937	4.88383	3.19013	2.80471	2.45115	1.95368	2.20633	1.80716	1.12928
YKL176C	7.91862	7.19841	6.97992	7.16759	7.64683	7.88051	8.09384	8.6267	8.42229
YKL175W	12.4441	13.6637	14.5867	14.4621	13.7805	13.8308	14.788	13.4361	15.139
YKL174C	5.48204	5.44883	5.48682	5.47412	5.17573	4.69831	4.6949	4.91605	4.70737
YKL173W	4.07636	4.37409	4.31324	4.50722	4.98215	4.85241	4.30372	4.68772	4.60307
YKL172W	9.90409	11.3814	13.2711	15.4432	17.6874	18.7483	20.0606	18.817	21.5275
YKL171W	7.44736	7.55497	6.8281	6.16509	6.13352	5.81795	5.65311	5.22283	4.67511
YKL170W	15.7008	14.5158	16.721	17.1732	19.705	22.3736	26.8039	31.0101	30.7529
YKL168C	4.18193	4.3917	3.83827	3.28023	2.70257	2.89558	2.78961	3.3541	3.03168
YKL167C	17.5973	16.5893	15.8848	19.4806	21.61	26.3498	30.9425	34.485	33.5794
YKL166C	4.5441	4.7074	4.72849	5.28136	5.35779	6.09965	6.24067	6.80862	7.68581
YKL165C	3.77221	3.61193	4.99565	6.29516	7.24597	7.37266	7.46344	8.30199	8.25934
YKL163W	81.2461	80.6328	39.4312	20.2402	4.81998	1.17202	1.0484	1.05789	0.987188
YKL162C	6.78258	6.28171	4.1011	3.64297	2.92836	2.59179	2.60621	2.28094	2.03673
YKL161C	6.66657	7.02083	6.76436	5.20769	2.95397	2.46989	3.01661	2.39172	2.35934
YKL160W	29.6758	30.2094	28.5396	28.4951	32.2958	34.2909	37.9573	32.479	33.9419
YKL159C	7.78481	6.62476	5.25616	4.92137	4.92988	4.45948	4.84934	4.55135	4.37448
YKL157W	11.2785	11.8597	12.1781	11.6102	11.2865	10.3873	10.9169	10.4609	10.1523
YKL155C	6.18742	5.74429	5.99183	6.71477	8.50958	9.26065	10.9928	12.2202	12.551
YKL154W	5.64739	6.6365	7.66149	8.8986	8.49235	9.43494	9.61518	10.8086	11.1047
YKL152C	276.296	335.18	285.753	216.287	106.442	78.0494	69.3239	75.73	86.6966
YKL151C	25.6408	26.642	25.4938	20.2608	8.97512	4.75002	4.80755	4.30061	4.45119
YKL150W	55.7958	63.9727	73.9161	68.6486	60.0404	54.9169	57.7531	56.2848	51.2676
YKL149C	7.43569	8.16942	6.51989	6.33896	6.78851	6.61703	5.27561	3.7682	3.58717
YKL148C	30.354	34.41	38.4357	41.737	57.9319	61.5964	66.0697	62.1549	50.5153
YKL146W	9.9228	10.5631	10.8008	10.0776	11.2325	10.2529	10.2868	10.1485	10.4569
YKL145W	29.5038	31.5959	33.7746	29.6948	25.093	22.1084	22.2332	22.4048	24.5868
YKL144C	5.74075	6.81428	7.05378	7.03436	7.76635	8.4775	8.53443	8.51105	9.22041
YKL143W	5.78937	6.18515	6.63271	7.50305	9.02896	9.57463	9.32534	8.21185	8.72786
YKL142W	44.3675	47.7429	48.0225	40.7944	26.3226	19.6143	18.595	15.6732	14.4339
YKL141W	45.0765	52.8281	60.2461	63.5849	72.3541	75.2096	71.7865	63.0995	65.1357
YKL140W	7.32328	7.28907	7.1836	6.51749	5.82273	4.84172	4.45245	4.57447	4.62425
YKL139W	6.12261	5.76006	5.26843	5.1331	5.03483	5.46678	5.83532	5.74065	5.57151
YKL138C-A	25.1345	25.5825	23.045	18.833	17.1306	16.049	15.8987	15.0918	17.6264
YKL138C	18.0479	16.4764	19.8992	24.5801	29.4996	37.3709	45.318	48.0322	44.7165
YKL137W	20.3862	17.8336	21.3464	24.2271	23.2492	29.0799	31.7557	35.8469	42.8518
YKL135C	7.32927	7.85691	8.07666	7.84187	7.60619	7.67202	7.29874	7.65634	7.37662
YKL134C	4.2946	4.12885	4.38025	4.4459	4.96286	5.11286	6.06328	6.81808	6.39172
YKL133C	6.53059	7.77592	8.92207	7.4697	4.53272	3.8534	3.78664	3.51466	2.87227
YKL132C	2.61067	2.71189	2.63639	2.35288	2.38568	2.42641	2.12142	2.19034	2.21477
YKL130C	7.68423	7.72466	7.08753	7.72254	7.30244	8.21822	8.04695	8.45405	8.42127
YKL129C	3.32816	3.36628	3.76617	3.57269	3.58784	3.1935	3.0231	3.44583	3.21603
YKL128C	4.32628	4.33947	5.76787	7.12341	7.82955	9.07443	8.47832	9.90101	11.1031
YKL127W	5.92511	6.39433	6.86846	7.71239	8.21891	8.26279	8.04581	7.82032	7.86306
YKL126W	8.29281	9.25723	11.7341	11.3153	10.6491	10.085	9.16216	9.49316	9.69108
YKL125W	5.00174	5.29399	5.5989	5.67	5.53831	5.83574	5.7404	5.89979	5.74767
YKL124W	9.77084	10.3419	10.0393	8.99599	7.51633	6.46625	6.70627	4.81895	4.4154
YKL122C	13.3822	14.6393	17.074	17.8898	16.4905	15.7408	18.5132	13.8577	15.4245
YKL121W	4.20651	4.05683	3.5886	3.43755	3.0835	2.89659	2.73935	2.93039	2.80196
YKL120W	8.79746	11.9127	13.2318	17.0877	17.9829	20.9318	23.3092	23.6496	26.9877
YKL119C	7.37236	7.04692	6.76265	7.82898	7.66122	8.86812	7.79607	7.37468	7.49567
YKL117W	47.3511	52.7865	56.7047	54.0324	46.2549	43.4216	46.0261	43.2544	47.3098
YKL116C	4.72494	5.14668	5.12122	5.41459	5.71359	5.93699	6.33977	6.4596	7.12297
YKL114C	9.27687	9.71151	10.2089	10.1688	10.0807	10.4492	10.1414	9.94054	9.88006
YKL113C	9.25509	9.88008	10.541	11.1678	11.0716	11.4615	10.7382	9.92273	10.1386
YKL112W	7.74171	8.77169	10.1023	9.97686	9.99071	10.1787	9.57893	9.22511	9.99501
YKL110C	7.36384	7.18092	6.9305	7.77805	8.30967	9.79235	10.2963	10.4612	11.1687
YKL109W	12.7266	15.9173	17.7523	20.6039	27.7604	35.5905	41.0699	47.4459	42.9184
YKL108W	5.19375	5.16218	4.95334	5.00706	4.78349	4.29215	4.19331	4.49775	4.64677
YKL107W	30.3552	29.757	17.1646	10.1297	2.78082	0.875435	1.06458	0.66115	0.452595
YKL106W	5.53733	6.81833	7.84511	7.97644	7.66608	7.37713	6.45395	5.86671	6.49933
YKL105C	3.65943	3.86042	4.62335	4.58183	4.46549	4.35163	4.37342	4.91306	4.80943
YKL104C	19.2175	20.34	16.9137	14.9199	13.702	12.4516	13.0672	10.7814	10.6946
YKL103C	11.8592	14.7218	18.7977	15.8951	9.92917	6.81807	6.43541	6.48634	5.98573
YKL101W	3.1847	3.23582	4.07603	4.75124	6.19193	6.32213	5.76696	7.79104	7.82147
YKL100C	15.1886	17.1514	18.4913	16.2891	13.6624	11.5939	10.9546	8.98493	8.27885
YKL099C	7.04554	6.92337	7.77919	8.38596	7.94775	9.0052	8.93658	8.1379	9.49841
YKL098W	6.2354	6.30118	6.11444	5.7836	5.53103	5.27285	5.34719	5.26667	4.84759
YKL096W-A	277.141	374.502	394.566	328.703	273.926	198.403	166.959	156.73	167.803
YKL096W	7.6352	7.61286	6.50785	6.34564	5.15833	3.61645	4.03066	5.00848	4.6327
YKL095W	6.82356	6.40483	5.49991	4.60371	5.58499	4.98546	4.847	4.49008	4.56747
YKL094W	23.2653	24.62	23.6997	20.8847	17.4345	16.0028	16.1494	15.9776	16.2477
YKL093W	21.4816	22.1564	16.0393	12.7251	10.171	7.52553	7.03561	5.70117	4.78299
YKL092C	1.92615	1.92179	2.53107	2.78429	3.43838	3.48062	3.36827	3.93386	3.85371
YKL091C	11.3152	12.3776	10.2166	9.03184	6.52832	5.5263	6.38649	5.18504	3.87778
YKL090W	4.9354	5.20962	4.54082	4.16979	3.41934	3.98442	4.18725	4.13598	4.24606
YKL089W	3.27702	2.91443	3.0841	3.51539	3.94498	3.71189	3.58516	3.9593	3.88256
YKL088W	5.91505	6.01362	6.62804	7.01299	7.97747	8.02831	7.91311	8.78537	8.34774
YKL087C	10.2272	10.0407	11.9824	14.1594	16.8549	19.0934	24.7497	28.9962	31.0695
YKL086W	6.86894	5.77651	5.15995	3.8303	1.82566	0.854	1.19131	0.96442	1.21085
YKL085W	40.0585	44.2199	40.9863	41.9643	53.7101	56.0876	59.7041	64.7858	54.2562
YKL084W	10.6284	10.2266	8.74035	8.2977	7.83703	7.66789	9.18983	8.83549	8.793
YKL082C	9.9843	9.78971	10.893	12.343	13.4962	13.4254	14.2196	15.4217	16.4855
YKL081W	18.5702	21.9947	26.6458	33.7161	46.6882	53.8662	49.9063	57.1581	56.6905
YKL080W	16.716	17.8958	18.1091	18.5572	19.2686	20.1319	19.78	20.2546	22.835
YKL079W	5.23157	5.16551	4.61106	4.39937	3.92047	4.58285	4.24582	4.07319	3.94275
YKL078W	1.70448	2.05811	2.09988	2.64359	3.1104	3.27075	3.32375	3.29023	3.60132
YKL077W	12.171	13.1201	14.2786	15.4265	15.6034	15.1652	14.8043	15.0446	15.4608
YKL075C	7.19942	7.1248	6.87852	6.65187	5.67989	6.14991	6.22757	5.84531	5.4501
YKL074C	5.53495	5.24855	5.53945	5.37961	5.07771	4.71643	4.95507	5.18151	5.23013
YKL073W	4.68763	4.81928	5.73005	6.12772	6.3539	6.00703	5.69616	6.45071	6.90432
YKL072W	2.90632	2.76491	2.54234	2.30296	1.83039	1.60813	1.72942	1.57975	1.89143
YKL071W	5.90425	6.11009	4.5891	3.79963	3.37793	3.47531	3.12288	3.19394	2.72581
YKL070W	7.03103	6.50319	5.69875	5.1752	5.04487	4.8427	4.54609	4.14244	4.24301
YKL069W	14.4933	14.7564	13.2813	12.7863	10.4143	11.2977	11.3682	11.3085	9.73146
YKL068W-A	22.8992	24.1244	17.0811	18.4408	15.6259	17.829	15.8983	16.0146	14.4363
YKL068W	3.80255	4.21884	5.22502	5.95457	7.2451	8.67978	10.0919	9.32954	9.91763
YKL067W	44.4557	47.6931	46.2417	44.839	41.6643	49.3886	60.348	56.0325	43.0265
YKL065W-A	106.62	77.4044	36.9553	22.3285	5.34797	2.6107	2.38334	1.82125	1.3385
YKL065C	39.4004	42.9975	44.5885	38.5991	25.6451	22.164	20.5829	16.4749	14.9831
YKL064W	8.30666	8.53987	8.26032	7.60795	6.44649	6.29176	6.42514	6.59822	6.451
YKL063C	10.6284	10.669	11.3519	11.7339	11.108	11.5376	12.3803	12.8308	12.6899
YKL062W	5.22998	5.1369	5.67417	5.2881	5.13145	5.22048	6.45321	8.40706	10.4527
YKL061W	14.3595	13.5779	13.5513	13.6244	12.3956	12.2139	11.3747	11.7211	11.3467
YKL060C	295.882	359.736	338.402	290.406	205.485	183.178	163.57	139.963	148.911
YKL059C	7.10903	6.16701	5.31013	5.47744	5.29638	5.28722	5.53229	5.33316	5.60487
YKL058W	31.2392	27.1862	24.5768	22.4164	20.5045	21.8206	21.9955	21.9424	28.5237
YKL057C	4.43357	4.90281	5.80831	6.57118	7.50042	8.18663	7.77613	7.74548	7.5225
YKL056C	81.5556	87.6099	91.1193	99.9075	104.506	128.12	105.75	137.381	182.824
YKL055C	1.04476	1.18877	0.967207	1.20705	1.31714	1.8759	1.72372	2.0234	1.6091
YKL054C	14.2549	14.4173	16.64	16.6965	19.7247	20.0361	23.0039	22.7366	23.7393
YKL053C-A	24.7698	21.2467	23.1731	24.5435	26.413	30.3114	30.4967	38.9016	40.2791
YKL052C	9.2914	9.8763	9.57796	9.23137	8.50316	7.46195	8.24517	7.93772	8.26121
YKL051W	7.12163	7.48211	7.68377	7.42728	6.24173	6.08571	6.55157	6.69546	7.11031
YKL050C	7.91215	7.93209	5.3716	3.75655	2.24796	1.51304	1.38272	1.49653	1.24947
YKL049C	10.5077	9.99032	9.65408	9.19613	7.5896	7.51554	6.8018	5.47809	5.71044
YKL048C	3.26856	3.34581	3.66259	3.93871	3.96881	4.59438	4.11463	4.40646	3.95015
YKL047W	4.88008	5.50884	5.09142	4.94387	4.81554	4.63296	4.71957	4.43992	4.13426
YKL046C	13.5943	14.0877	15.2905	15.2649	15.7008	14.1477	13.9341	14.4673	15.5851
YKL045W	7.26282	7.29438	7.23712	6.95186	7.19092	6.93398	6.86362	6.04759	5.50001
YKL043W	17.9599	17.7178	16.8097	14.5267	17.0261	17.1129	20.3521	30.1699	34.9805
YKL042W	5.17344	5.37854	5.00893	5.18269	5.49385	5.43175	5.73024	5.03373	4.83308
YKL041W	13.2826	12.8733	12.0538	12.3868	11.4511	10.9618	11.1273	11.423	11.4068
YKL040C	13.7633	13.8991	13.5368	13.7262	12.972	13.0815	13.0552	13.0084	13.8402
YKL039W	14.0782	15.1385	16.0586	15.9739	15.8821	14.331	15.0226	15.1863	15.7321
YKL038W	4.09461	3.8919	3.4399	3.49925	3.96302	3.70579	3.52298	4.42766	4.38707
YKL035W	17.0616	18.4538	17.6208	16.9022	17.1237	14.753	13.6398	13.4847	12.9479
YKL034W	6.36073	6.47761	6.55871	6.16069	5.92091	5.03175	4.97572	5.0702	4.87429
YKL033W-A	7.49137	9.47881	14.8214	17.4774	14.5978	15.2165	14.6201	12.4473	13.8149
YKL033W	3.39408	3.29095	2.77143	2.84137	2.82426	3.05215	3.20603	3.14777	2.99725
YKL032C	9.53865	9.50837	11.1352	10.7816	12.8905	11.5394	12.9629	11.2459	12.1268
YKL029C	6.27728	8.96925	13.2241	14.8567	16.6613	17.5995	20.7181	17.3373	18.1396
YKL028W	8.69683	9.21802	9.9894	9.84028	10.2501	10.9831	11.1687	11.8779	11.8515
YKL027W	7.0469	7.21693	7.50742	8.56024	9.64454	10.2904	9.88616	9.17642	9.32835
YKL026C	38.7679	40.5053	28.1483	19.3859	7.89147	4.20398	3.8783	2.41683	1.84754
YKL025C	5.82406	5.94277	6.17216	6.29134	6.01403	6.41149	6.55037	6.61848	6.61056
YKL024C	12.1629	14.0343	13.0431	14.517	16.2783	17.2346	15.2184	14.4841	14.0843
YKL023W	9.92716	10.0998	10.5346	8.95764	6.82537	5.29359	5.44864	4.39381	4.31434
YKL022C	4.85633	4.95258	4.88756	5.0038	4.91277	5.04584	4.88727	5.06061	4.90367
YKL021C	7.60075	7.93997	7.71518	8.46561	9.73135	10.5373	11.1157	9.99054	10.5249
YKL020C	6.74652	7.51671	7.78135	7.2232	6.6285	6.00724	5.12394	6.60532	6.51056
YKL019W	11.8168	12.4002	10.7618	10.796	11.0783	10.6617	10.1154	9.75144	9.3299
YKL018C-A	17.7975	17.3511	15.4563	14.7396	14.6511	13.2753	14.2005	13.572	14.0594
YKL018W	4.73207	5.20012	5.06531	5.97372	6.49516	6.43339	6.64356	6.44711	6.17754
YKL017C	3.61505	3.58562	3.68672	3.94365	4.06422	4.11964	4.12063	4.16874	4.00941
YKL016C	56.5323	65.7013	69.0065	73.0219	84.6683	89.6504	98.7936	88.0923	84.7454
YKL015W	6.87982	7.77334	8.33262	7.98801	6.39277	6.23569	5.87375	5.72931	5.72286
YKL014C	1.94374	1.90686	2.27233	2.97104	3.93856	4.3907	4.46283	4.9654	5.12911
YKL013C	27.5732	27.8233	26.9781	24.8978	23.2369	22.6987	23.9171	19.1082	19.0422
YKL012W	6.09128	6.76351	6.53332	6.18947	5.81501	5.92356	6.17855	5.9	5.75832
YKL011C	4.61556	4.83514	5.09581	4.93227	4.77834	4.8536	4.57829	4.32457	4.22073
YKL010C	6.2286	6.17438	5.78648	5.16911	4.82977	4.37323	4.22147	4.43968	4.29942
YKL009W	13.069	15.8084	18.4538	21.1602	22.2202	25.4189	25.4692	25.7055	28.7285
YKL008C	8.30658	7.10973	6.79232	6.57094	6.10164	5.34274	4.36778	3.8234	3.80944
YKL007W	18.0787	20.088	19.9177	19.5417	16.3576	15.769	15.7421	14.3878	13.2044
YKL006C-A	18.4018	17.4275	17.5477	17.9877	16.0684	17.9435	15.9043	18.3239	20.7429
YKL006W	53.754	65.84	74.4553	88.3178	99.1147	121.273	103.915	124.146	141.227
YKL005C	6.85449	6.59762	6.54557	5.85554	5.218	5.02956	4.74606	5.2255	4.89599
YKL004W	10.7237	10.7069	11.2685	11.7487	12.2039	12.9802	13.3504	14.3042	14.6685
YKL003C	15.1016	14.7527	15.5433	19.1082	21.7718	25.1917	27.7295	31.8263	31.731
YKL002W	21.6504	21.4628	20.4775	18.8951	18.1942	17.1572	16.9436	14.6526	14.6836
YKL001C	23.7931	31.0209	37.4051	48.277	64.7969	79.287	78.716	80.8755	91.798
YKR001C	13.6879	14.7056	13.7731	13.514	13.6524	12.9675	13.4392	10.9069	10.7425
YKR002W	8.9336	8.69777	7.94056	8.26878	9.57123	9.95444	9.99414	8.46468	8.0742
YKR003W	6.48506	7.30076	6.95813	6.66877	6.07705	5.88124	6.4087	6.04773	5.66461
YKR004C	5.41899	5.32339	4.31038	4.30385	3.81038	4.82677	4.57146	4.60199	3.93364
YKR005C	4.8336	4.0573	2.88023	2.7811	2.51679	2.12441	2.1578	1.83385	1.80908
YKR006C	12.4237	11.7787	14.4384	16.6238	20.5812	22.5444	29.8144	32.5866	35.223
YKR007W	16.9231	16.9003	16.0466	15.1809	13.5387	13.1812	14.4088	13.6899	13.7238
YKR008W	4.32303	4.50812	5.5338	6.2146	6.54366	7.20466	7.73525	7.89639	7.55067
YKR009C	33.6146	32.8932	24.1219	18.4635	16.372	12.7416	13.3415	2.37909	1.22889
YKR010C	2.91608	3.08072	3.1235	3.20023	3.4632	4.2963	4.07375	4.56609	4.07444
YKR011C	6.001	7.11026	9.66593	9.72169	8.93794	8.56403	8.96666	8.78166	8.49046
YKR013W	17.5279	21.0147	22.3633	20.7338	22.9207	18.3281	17.35	16.9651	19.1596
YKR014C	24.8277	26.0356	25.9835	23.3348	18.2752	15.3386	15.3294	13.7365	13.1648
YKR015C	3.20124	2.98478	2.26086	2.36449	2.3599	2.97105	3.41986	4.54023	3.80944
YKR016W	8.60798	10.8801	13.9481	16.7469	22.8144	27.4121	34.2877	32.5195	28.2918
YKR017C	5.73045	5.99194	4.94659	4.33683	4.06455	3.74331	3.45697	3.35326	3.16444
YKR018C	19.0497	18.3925	16.8544	14.8271	11.254	9.71763	9.59958	9.34635	9.04605
YKR019C	3.09576	3.5734	3.79913	3.753	2.8643	2.68428	2.46835	2.37053	2.44279
YKR020W	8.33444	8.94322	9.56527	9.42047	8.11661	7.47568	7.70377	6.11443	6.5674
YKR021W	4.38484	4.76348	4.54148	4.58875	5.03081	5.36079	5.21139	4.68982	4.52751
YKR022C	8.47775	8.21435	6.86169	6.68279	5.96562	5.60043	6.05481	5.73846	5.28484
YKR023W	4.22593	4.16872	4.15716	4.0885	4.0139	4.23473	4.51447	4.6543	4.11003
YKR024C	3.25373	3.85	4.31956	4.76754	4.79148	5.18299	5.2219	5.11935	5.7085
YKR025W	6.88934	6.51413	6.74227	7.44817	7.46934	8.52334	8.31366	7.77818	8.37688
YKR026C	8.4579	7.82617	7.43008	7.96709	8.79592	9.03044	9.90014	9.61189	10.5472
YKR027W	2.8379	3.06703	3.05746	3.25723	3.6451	3.85132	3.98021	4.16491	3.64804
YKR028W	4.94984	5.30393	6.22064	6.51893	7.27519	7.6359	7.93042	9.79474	9.94375
YKR029C	4.23176	4.63911	4.39212	4.22504	3.94045	4.08605	3.90239	4.14201	3.89743
YKR030W	8.03662	7.03524	7.34536	7.20511	6.0501	6.31558	7.16299	6.67436	6.81228
YKR031C	3.28416	3.37562	3.65828	3.68422	4.144	3.76916	3.44206	3.89409	3.72245
YKR034W	6.90992	4.93542	1.4767	1.27646	1.46526	1.263	1.0523	0.500989	0.535994
YKR035W-A	16.4181	16.8479	18.8167	18.4452	19.7403	19.8648	19.4085	17.8547	20.4837
YKR036C	5.05499	5.4733	5.20276	4.92883	4.78987	4.27145	5.10428	4.7491	4.79354
YKR037C	6.36066	6.58057	6.30408	6.09736	5.8684	6.00968	6.34169	5.40534	5.47659
YKR038C	8.13378	9.64003	10.0516	10.6775	11.8927	11.7112	12.4595	11.8533	11.8467
YKR039W	23.9273	21.6922	18.4366	17.2526	22.1609	19.4675	12.1212	9.32876	10.2145
YKR041W	2.2041	2.2951	2.92827	2.85663	3.38204	2.86113	2.63071	2.75857	2.61476
YKR042W	34.1164	36.6192	48.1423	53.259	66.6229	61.6215	64.8881	62.9079	63.6487
YKR043C	12.9875	15.3437	16.9483	18.0105	19.1748	19.884	22.0132	20.7873	23.1092
YKR044W	6.3697	6.46531	5.83981	6.03945	5.98954	6.12386	6.77654	6.77688	6.46299
YKR045C	4.81642	4.70566	3.52074	3.69394	3.8744	3.91152	4.0401	4.02212	3.82318
YKR046C	86.5226	91.3616	93.1468	79.5384	56.6047	41.1101	41.6755	30.3417	27.9415
YKR048C	25.6097	24.3359	23.3377	22.4827	23.3047	22.6385	22.3772	21.7115	21.7205
YKR049C	34.8478	39.2975	34.7824	27.5735	16.6819	11.3781	9.9425	6.1926	5.05288
YKR050W	4.71304	4.5875	4.36572	3.8248	3.31067	2.8925	2.87161	2.3794	2.18523
YKR051W	6.67305	6.8653	5.78068	5.30266	4.63535	3.89884	3.87173	4.28121	4.42745
YKR052C	4.70952	5.20511	4.99748	4.48675	4.29395	4.20534	5.05555	5.44355	5.15109
YKR053C	3.97092	3.64931	4.53933	5.37431	4.25576	2.92404	2.71087	3.43445	3.18352
YKR054C	1.30135	1.19065	1.132	1.32844	1.52202	1.45299	1.37998	1.83031	1.67595
YKR055W	6.41024	6.36993	6.24139	5.77709	5.41978	5.28841	5.96115	5.14777	5.05649
YKR056W	5.77281	6.04687	7.00589	7.93467	8.47196	9.20215	9.04478	7.99271	8.56711
YKR057W	41.8103	48.1536	53.8826	66.6387	66.1589	83.5844	60.2035	82.8917	91.3476
YKR058W	9.76988	9.54513	8.70543	7.61919	7.59809	6.58968	5.52256	5.27276	5.21893
YKR059W	32.1661	38.4704	40.4641	46.0858	53.6802	56.4927	58.1304	58.6404	60.7482
YKR060W	4.58003	4.69603	4.84364	5.75987	6.2309	6.90041	7.62266	7.02724	7.25861
YKR061W	5.89	5.81169	5.80759	5.53248	4.35348	4.037	4.5859	5.01156	4.5001
YKR062W	8.07988	7.4737	6.92159	7.10407	6.27823	6.03332	6.46	6.13459	6.10956
YKR063C	5.19679	5.18114	4.85115	4.76177	4.45772	4.55814	4.83241	4.67357	4.38944
YKR064W	3.38601	3.12098	3.41488	3.5777	3.81817	3.81096	4.1192	4.15526	4.08671
YKR065C	18.6205	21.2421	20.3761	21.0023	21.0255	20.9804	22.1312	18.6237	18.4195
YKR066C	21.312	22.3263	20.5192	19.1696	18.3743	15.8445	17.0145	11.1812	10.6752
YKR067W	13.5486	14.7986	16.1421	16.5256	17.8818	18.0042	17.4472	11.1822	8.72435
YKR068C	26.3718	24.1207	22.2689	18.6852	14.8957	13.0777	12.3649	12.2847	13.2373
YKR069W	9.15606	10.4343	11.5772	14.5262	17.2098	19.4147	17.61	19.0933	19.407
YKR070W	9.37517	9.31754	8.30273	7.77129	6.67783	6.42491	5.79326	6.26307	6.20493
YKR071C	21.702	21.1819	18.5572	20.1249	21.7837	22.8178	24.0653	24.0017	27.289
YKR072C	8.71307	9.458	9.21455	8.33282	8.58604	8.91885	9.16187	9.09111	8.80187
YKR074W	23.0311	21.4913	21.8447	20.3866	15.7322	18.3262	16.9981	19.5627	25.3613
YKR075C	14.0089	11.8088	9.77464	10.5958	12.0554	11.179	11.5915	9.87601	9.37593
YKR076W	31.2388	37.2377	29.4987	21.4213	9.73043	5.78106	5.16911	3.72667	2.71952
YKR077W	9.24181	9.71004	7.57292	6.81557	7.13809	6.25691	6.83523	6.07436	5.86854
YKR078W	4.54894	4.47462	4.04637	3.74863	3.45558	3.52104	3.92791	3.512	3.21006
YKR079C	3.94931	3.3854	3.24652	3.88245	5.1467	6.05746	6.75235	8.08859	8.29088
YKR080W	11.6016	12.8916	14.5399	16.5148	16.6577	16.1185	15.9675	18.8227	20.5661
YKR081C	7.67621	9.87757	11.2179	12.6498	13.8658	15.1177	15.534	15.3321	15.9911
YKR082W	3.85583	3.97011	4.24808	4.86531	5.67439	5.89294	5.71181	6.37632	6.51779
YKR083C	9.20628	7.85599	8.77469	8.68151	8.47717	8.38893	8.66065	9.35452	11.888
YKR084C	6.58545	7.19955	7.42747	7.39205	7.69024	7.1394	7.15866	7.41687	7.00532
YKR085C	13.0475	12.4484	14.7698	17.9162	24.0434	28.1197	34.7354	41.2333	44.0421
YKR086W	3.83011	3.32975	3.31302	3.28533	3.4337	3.41916	3.4554	3.91166	4.19897
YKR087C	7.53472	7.58705	7.32241	6.80524	6.92463	6.57197	7.05089	6.53021	6.21304
YKR088C	9.68042	10.1075	9.72513	9.46876	9.35561	8.95526	7.35212	7.926	7.59879
YKR089C	5.33678	5.44498	5.52721	5.55954	5.52635	5.21687	4.9304	5.63781	5.26457
YKR090W	4.13515	3.83762	4.2327	4.29872	4.93751	5.11234	4.82189	5.39436	5.28013
YKR091W	13.8958	15.5368	15.1078	11.137	5.16565	2.77691	3.01619	1.8313	1.44411
YKR092C	5.18001	6.71284	8.73607	11.7196	14.0259	17.0933	19.0156	19.579	20.3325
YKR093W	3.52716	2.9401	2.69615	2.74595	3.1217	3.10525	4.17384	6.69651	8.16883
YKR094C	52.3261	60.0571	66.5129	78.2081	91.9365	110.417	105.276	122.19	133.774
YKR095W	4.07806	3.86785	4.1543	4.24138	5.21091	5.2457	5.01844	6.31487	5.95708
YKR095W-A	12.4083	13.0031	13.4096	13.7181	14.879	14.8989	15.505	14.1057	14.053
YKR096W	4.69862	4.91583	4.91055	4.77987	4.9725	4.50882	4.38419	4.21579	4.05403
YKR097W	4.38304	4.81061	5.06427	6.35954	9.47279	11.3748	16.6783	4.26459	1.31835
YKR098C	3.23269	3.04016	2.9012	3.0615	2.99617	3.44293	3.95903	3.52319	3.80286
YKR099W	3.35726	3.29982	3.78874	4.20674	3.75815	4.08573	4.33741	4.25675	4.64809
YKR100C	10.8845	10.5903	10.725	10.1998	9.76702	9.79139	10.2214	10.1931	9.39222
YKR101W	4.7595	4.87061	4.00638	3.7983	3.25106	3.3609	3.22235	3.20777	2.69919
YKR102W	4.79985	3.02642	2.27627	1.92736	2.17221	1.81695	1.63727	2.02594	2.03988
YKR103W	2.04337	1.82221	1.23517	1.19226	1.2317	1.0952	0.960542	1.30817	1.18107
YKR104W	4.18851	3.35337	1.89029	1.75992	1.79644	1.48968	1.46558	1.85428	1.68485
YLL062C	9.6434	10.0191	8.94789	14.5656	23.1512	28.7359	34.7575	30.6359	26.029
YLL061W	26.8077	23.1624	18.3347	21.2042	31.1871	34.5197	32.4516	26.7667	22.5047
YLL060C	15.1014	12.1762	7.46789	5.73083	3.19105	2.43738	2.41635	2.52958	2.13981
YLL058W	4.23772	4.14161	5.82697	5.65953	3.9908	3.31381	2.83559	2.57579	2.3163
YLL057C	6.14099	4.86359	2.29759	1.70846	1.75287	1.54456	2.11564	1.66123	1.30485
YLL056C	8.30648	7.95783	6.36435	5.36581	2.98637	2.00878	1.57015	1.50808	1.34946
YLL055W	7.80858	10.4755	11.5817	10.0382	7.26864	5.82762	5.42448	6.68809	6.78017
YLL054C	3.15623	2.6783	2.64055	2.90204	3.16129	3.57806	3.89952	4.47291	4.50868
YLL053C	8.10124	12.1195	15.6878	18.5498	24.456	29.7145	30.664	14.5349	11.1825
YLL051C	5.53922	4.49091	4.4542	4.52431	4.41	4.38824	4.58876	4.83422	5.01281
YLL050C	55.5961	58.2798	64.5086	62.6962	53.7401	51.3382	41.8445	47.3745	45.5951
YLL049W	14.2347	13.459	11.177	9.53618	7.63757	7.30331	6.99551	6.71165	6.64647
YLL048C	5.73519	5.2676	6.69066	7.05491	6.95715	6.65669	6.24213	7.65513	7.43533
YLL046C	2.53987	1.49267	0.878001	0.580862	0.279025	0.267075	0.253772	0.146096	0.220047
YLL045C	67.5343	68.0392	75.3387	82.6593	99.3681	114.361	105.176	121.74	142.303
YLL043W	8.74126	8.53509	10.4412	10.2872	11.4057	11.4892	10.2347	11.1484	11.1446
YLL042C	7.11939	5.66471	4.83382	4.62335	3.96627	4.25188	3.88614	4.29627	4.47984
YLL041C	80.7289	80.6092	77.6995	76.3949	88.4642	91.7423	98.1396	84.5866	73.3415
YLL040C	3.38971	2.91811	2.43821	2.31299	2.13332	1.9924	1.99058	2.17293	2.01372
YLL039C	90.6759	100.612	95.9395	87.1464	52.8465	42.2415	30.4792	30.0827	26.0034
YLL038C	2.99324	2.61282	3.74062	4.05603	5.07384	5.46527	5.88912	6.31524	6.21104
YLL036C	6.05756	5.9197	6.52881	7.055	7.89247	8.10153	8.35471	8.03369	8.5628
YLL035W	2.66832	2.45113	2.61944	2.91619	2.63874	3.24293	3.55676	3.2559	3.75939
YLL034C	3.95645	3.6727	4.32782	4.97268	5.32957	5.96195	5.47081	6.01551	6.30546
YLL033W	5.44234	4.60205	4.07169	4.12403	3.93108	4.30389	3.58238	3.78097	3.4427
YLL032C	3.29645	2.87136	2.59593	2.56802	2.50491	3.0752	2.994	2.78628	2.96851
YLL031C	6.61604	6.55198	7.14352	7.11766	6.94091	6.86546	6.97282	7.74302	7.92931
YLL029W	12.4299	11.6923	11.6404	10.4843	9.35108	8.46504	8.60959	8.6611	8.38935
YLL028W	6.97772	6.26387	6.60922	5.58285	5.48107	5.59725	7.1422	16.7196	19.1568
YLL027W	15.5793	16.5749	19.0587	18.9653	16.9777	15.8504	17.6411	15.9164	16.1154
YLL026W	93.8378	91.9433	76.9421	54.6275	23.6533	11.2328	10.5219	13.8585	13.3691
YLL025W	3.59986	4.16699	5.74573	3.55193	1.99974	1.64509	1.6276	1.52472	1.4498
YLL023C	23.8311	22.6138	18.5738	15.0743	9.78696	6.64107	5.58793	5.52467	5.39304
YLL022C	13.3868	11.3254	9.65908	8.77076	8.28694	7.21604	6.79623	5.56565	5.62183
YLL021W	5.47324	5.04845	5.58044	5.77446	6.96237	6.46283	6.33928	7.19799	7.35893
YLL019C	18.3061	17.7113	19.4943	16.5895	15.4813	13.1769	12.5673	12.0073	11.3521
YLL018C-A	4.83843	5.9629	7.1469	6.96621	7.24447	7.37682	7.83509	8.7453	8.38011
YLL018C	20.6243	19.9704	20.476	19.8279	20.5717	17.2049	17.0804	17.0042	18.6556
YLL017W	4.83462	4.17884	3.42762	3.2882	3.25443	3.49082	3.42729	3.09052	2.69387
YLL015W	6.75807	6.09784	5.5183	5.27667	4.32932	3.67445	3.72692	3.90589	3.71666
YLL014W	24.4506	20.6666	22.3275	22.43	20.9926	25.3192	21.5997	28.5583	36.3602
YLL013C	3.09223	2.83595	3.18306	3.7253	5.02237	5.58028	5.39542	4.82626	4.49391
YLL012W	7.29864	9.20868	13.2045	13.6739	10.9142	8.35957	6.79522	7.56615	8.00892
YLL011W	6.11349	6.47659	6.80581	7.86072	8.44452	9.52841	10.5228	9.86643	10.5803
YLL010C	3.76662	3.81601	3.87388	4.10983	4.05846	4.35865	4.56286	5.11835	4.66826
YLL009C	29.8939	23.8074	31.0079	35.4507	41.919	53.832	74.7935	106.538	123.298
YLL008W	5.35322	5.26211	6.0974	7.32948	8.99995	10.5507	10.4845	11.8208	11.8896
YLL007C	2.60561	2.28147	2.03066	2.03731	2.27777	2.68695	3.09807	3.20717	2.63465
YLL006W	4.68995	4.58198	5.24027	5.03022	4.99947	5.15575	5.26188	5.20727	4.63775
YLL005C	4.09768	3.52588	3.1726	3.19211	2.9066	3.03871	3.34422	3.1647	2.89565
YLL004W	3.10578	2.53677	2.88269	3.05796	3.21759	3.64569	3.32139	3.68558	3.52667
YLL003W	5.19931	4.70429	4.89937	4.78356	4.675	4.64199	4.32754	4.81449	4.69663
YLL002W	3.94755	3.65672	3.8886	3.97961	4.33142	4.55277	4.60351	4.29573	4.16902
YLL001W	9.01511	8.41563	9.56398	10.1406	12.8283	14.9331	17.3058	16.5552	13.9472
YLR001C	6.94619	6.50139	6.63758	6.16231	5.87221	5.48876	5.31885	5.32115	4.78566
YLR002C	4.27391	4.11259	4.36369	5.37166	6.24009	7.14201	7.59818	6.99376	6.91061
YLR003C	11.8284	10.1514	9.10905	9.38311	10.0078	10.9352	11.7699	9.08855	8.4431
YLR004C	7.02027	4.77416	3.24048	2.39169	2.33122	1.96087	1.75599	1.48098	1.18825
YLR005W	13.263	11.4838	9.91131	8.87813	7.97598	7.4765	6.90246	6.19783	6.46894
YLR006C	4.33324	4.14555	5.52591	4.9159	4.53499	4.19154	4.24441	4.44157	4.82445
YLR007W	14.9802	12.0899	9.10973	8.99982	7.81004	7.30094	6.73787	6.25111	6.49073
YLR008C	9.88209	8.65011	11.7958	15.9026	20.8398	25.5712	32.6397	36.4608	36.3064
YLR009W	15.1277	14.3552	16.8452	20.1676	21.8438	25.265	24.6503	23.6755	25.4888
YLR010C	8.97646	6.75819	5.03265	4.45067	3.51128	3.87651	3.04363	2.57452	2.45727
YLR011W	5.05162	5.50246	4.97964	4.69265	4.46109	4.69044	4.41495	3.43009	3.44017
YLR012C	0.509912	0.253518	0.294841	0.0879612	0.324749	0.321909	0.442247	0.113005	0.0816909
YLR013W	0.848491	0.545614	0.262664	0.297325	0.206672	0.176667	0.180199	0.02133	0.0710092
YLR014C	2.57069	2.15979	2.43688	2.64071	2.86123	3.15281	2.6417	3.29419	3.05211
YLR015W	6.33321	5.28844	4.68122	4.40483	4.56213	4.94866	4.81862	4.5399	4.72368
YLR016C	8.24285	7.26448	6.51562	6.39411	6.65037	5.9766	6.177	6.31653	6.60628
YLR017W	15.5483	14.485	12.9498	13.5967	14.0874	14.5082	13.6832	12.8057	13.9268
YLR018C	10.0071	8.92287	8.47139	8.62355	7.76055	8.97552	9.78212	9.01471	10.2188
YLR019W	11.1075	9.33387	9.63027	8.61978	7.68532	7.58899	8.26412	8.15351	7.82709
YLR020C	5.31591	4.96189	5.86785	6.50832	6.87934	7.72443	8.2432	9.4015	9.59308
YLR022C	6.46332	5.93163	6.46053	6.86733	7.73145	7.44919	7.54568	8.15149	10.0073
YLR023C	8.33624	8.73194	13.4651	16.3629	22.5754	24.1918	23.983	18.9069	16.1876
YLR024C	1.75836	1.53512	1.71913	1.65263	1.53291	1.55358	1.75529	1.80246	1.63591
YLR025W	22.8791	20.8065	19.649	17.7493	15.785	15.3076	17.3413	15.0535	14.64
YLR026C	6.40466	5.77749	7.13499	7.51219	7.92246	8.7405	9.35621	8.30104	8.49287
YLR027C	25.1322	27.9006	35.3042	38.405	39.4783	38.4519	42.1042	43.6703	46.4934
YLR028C	23.8492	23.4756	21.1347	18.7391	16.8631	15.6346	16.5649	14.6788	15.5409
YMR121C	79.5526	87.66	93.3717	109.137	122.823	141.782	132.595	152.882	171.775
YLR030W	8.608	7.3482	6.12973	4.5933	2.94259	2.18382	2.01533	1.83853	1.86722
YLR031W	11.5161	10.2389	6.82532	5.51494	3.22781	2.03352	1.98549	1.55256	1.58372
YLR032W	3.93141	3.40899	3.52797	3.38821	3.31802	3.29587	3.06413	3.60066	3.55199
YLR033W	7.06369	6.52154	7.07993	7.17684	7.296	8.22975	8.6969	8.12233	7.58662
YLR034C	12.6515	10.6156	9.83298	9.0455	8.37476	7.52646	8.41309	9.03449	9.35875
YLR035C	3.75842	3.25262	2.90575	2.56253	2.36852	2.43018	2.54838	2.54267	2.25917
YLR037C	7.36862	6.00532	4.72984	4.28315	4.87327	3.75288	3.5745	3.1401	2.51424
YLR038C	65.4238	62.5028	67.9117	76.5318	94.5292	113.808	120.477	133.275	116.21
YLR039C	4.85555	4.34588	4.02455	4.42805	4.68776	5.03241	5.32496	5.9663	5.73455
YLR040C	9.83456	7.16654	4.72422	3.96102	3.76029	3.67779	4.24608	3.05267	2.60997
YLR042C	16.0645	12.1233	5.97618	5.30584	5.40083	4.29157	4.57188	3.49882	3.09499
YLR043C	51.077	47.183	51.4218	48.8592	48.9293	55.0012	50.8684	54.4772	62.6424
YLR044C	144.847	162.642	152.703	119.033	77.8679	58.7332	55.3173	72.8369	102.086
YLR045C	4.01575	3.97027	5.0916	5.70819	6.38082	6.99672	6.34589	7.07413	6.72331
YLR046C	5.55189	5.0234	4.42565	3.85046	3.90954	3.50243	3.79187	4.50203	4.65805
YLR047C	3.41277	2.73519	2.9896	2.95951	2.79955	2.58994	2.7625	3.23292	3.32546
YLR048W	45.7357	47.7604	56.1045	64.756	75.2029	89.8104	89.0507	100.433	111.431
YLR049C	9.8817	7.96988	5.76846	5.88212	6.13628	6.43646	6.31884	7.37562	7.20185
YLR050C	21.0301	18.2326	21.5143	23.3374	21.661	19.4715	13.3971	14.0726	14.0097
YLR051C	11.4456	9.88758	11.4825	12.0727	10.9928	12.4862	11.36	11.2188	12.8011
YLR052W	10.6782	9.22315	8.65747	8.51927	9.03659	9.507	11.7471	9.89261	9.90781
YLR053C	24.5256	14.8341	8.18675	6.22416	3.94959	3.43938	3.38008	2.55018	2.19811
YLR054C	2.88779	2.04834	1.61351	1.33483	1.19105	1.18707	1.14837	1.01827	0.588745
YLR055C	5.06011	4.70027	5.84783	5.73736	6.26239	6.41563	6.42489	6.43236	6.17566
YLR056W	31.0028	82.8902	181.141	157.715	99.676	48.4009	30.6604	30.265	31.8276
YLR057W	5.09593	4.8885	5.30037	5.48508	6.20864	6.45896	6.73323	7.01058	6.78318
YLR058C	24.794	28.1381	39.6011	48.8967	59.0191	59.9001	60.6686	77.3198	92.3318
YLR059C	9.6396	8.88961	8.31235	8.93255	10.9981	12.4669	13.2908	11.3891	11.2419
YLR060W	10.8256	10.9042	13.1214	15.0747	18.9257	21.9533	22.3149	22.0598	23.7235
YLR061W	49.3359	52.2212	64.753	74.6414	85.2612	106.087	92.2119	117.254	130.239
YLR063W	2.51983	2.49082	2.63	3.25429	3.60978	3.62986	3.38344	4.07412	4.13465
YLR064W	17.0433	15.8245	14.397	13.7697	11.9633	10.1552	11.0956	11.8549	12.4775
YLR065C	12.6176	11.6941	11.9884	12.4613	11.8683	13.8437	12.1316	12.0214	11.6724
YLR066W	16.6749	15.5977	16.1304	16.3558	16.1742	17.8283	15.2803	15.4996	15.1753
YLR067C	2.35985	1.98654	2.69865	3.07532	4.27963	5.09237	6.20423	7.43896	7.78991
YLR068W	13.7459	10.708	11.3556	11.4167	11.927	13.3344	16.0687	14.1328	15.7231
YLR069C	8.34397	7.71061	10.7417	12.9386	18.473	20.4854	25.1175	27.1339	27.4754
YLR070C	13.4398	13.4901	10.0988	7.92477	5.1536	3.48736	3.50438	2.32619	1.93067
YLR071C	3.65248	3.46237	3.97868	4.29381	4.7235	4.88505	4.81775	5.50258	5.47784
YLR072W	7.8323	7.1727	7.07541	6.75163	6.74502	6.5796	6.47514	6.10155	6.24869
YLR073C	5.82324	4.98774	4.28266	5.21554	6.23934	7.22884	8.40937	8.80461	8.29433
YLR074C	13.0914	13.3105	14.4801	15.0388	14.5124	14.8524	14.2377	14.1942	16.837
YLR075W	214.921	208.645	203.358	213.637	207.719	228.813	171.351	207.237	245.835
YLR077W	9.8334	8.6106	8.52208	8.61607	10.2423	9.64253	10.1753	9.28729	9.05317
YLR078C	14.2995	12.2444	10.6093	10.6209	8.42599	9.92637	7.26788	8.11977	8.79623
YLR079W	18.2825	14.7262	15.4657	14.9835	15.2519	14.6759	16.354	15.0407	15.7066
YLR080W	11.8729	10.7757	8.39488	6.58651	3.51091	2.37747	2.23128	1.8925	1.92077
YLR081W	2.82999	2.1582	1.7231	1.27257	1.20109	1.3732	1.39432	1.31478	1.2879
YLR082C	7.1653	5.81924	5.08703	4.62743	4.38086	4.32286	3.8891	3.8484	3.60805
YLR083C	6.80335	7.15286	9.53227	10.6159	12.1655	12.8198	11.9895	13.5417	14.3481
YLR084C	2.53948	2.40113	2.82788	3.67392	5.04571	5.49062	5.35285	6.00465	6.01274
YLR085C	6.16125	6.34958	6.13537	6.00345	5.55393	5.31302	5.18159	4.91516	4.77118
YLR086W	4.02559	3.36731	3.53245	3.3651	3.35255	3.41371	3.39268	3.72747	3.73255
YLR087C	1.68437	1.40353	1.23513	1.23527	1.316	1.26827	1.29525	1.50606	1.4727
YLR088W	5.6402	5.61503	6.16066	5.82358	5.23126	4.95595	4.59019	4.60164	4.78732
YLR089C	18.6264	17.1721	17.5214	19.1326	23.5641	22.5592	20.2272	10.5331	10.2697
YLR090W	7.38546	6.41887	7.68642	9.34467	12.7	13.6475	14.2589	11.4207	11.9844
YLR091W	5.82271	5.06423	4.54894	4.53633	4.94509	5.20345	5.25907	5.67493	5.55658
YLR092W	8.73097	8.8617	11.8616	13.7776	15.8226	17.8175	16.9577	20.6091	21.7852
YLR093C	32.9251	31.4067	32.2382	27.1888	20.6613	17.7173	16.7695	14.756	15.0946
YLR094C	4.86186	4.40325	4.42365	4.1061	3.90197	3.52173	3.22943	3.00223	3.02619
YLR095C	4.71252	4.69438	5.57536	5.56096	6.35651	6.45826	6.44056	6.43692	6.48917
YLR096W	3.58747	3.63687	4.31525	4.58631	4.81371	4.8085	4.52735	5.23857	5.67128
YLR097C	9.15448	8.59165	8.20488	7.63095	6.56212	5.83397	5.20702	5.77813	5.42551
YLR098C	3.74098	3.16238	2.9791	2.87679	2.89937	3.03182	2.95149	3.05875	2.91059
YLR099C	10.3452	9.22708	11.2469	8.92255	6.61807	4.38988	4.43576	3.88735	3.69819
YLR099W-A	11.4848	10.8469	17.7632	17.322	15.1043	12.9141	12.3018	9.74812	9.74653
YLR100W	14.0147	14.8234	20.4566	20.3226	18.2668	14.4667	12.8657	10.8621	11.4221
YLR102C	9.99104	9.47258	7.30335	6.16557	4.60207	4.56427	3.92735	3.57337	3.35497
YLR103C	3.96801	3.94091	3.8426	3.96976	4.91625	5.02789	5.12415	5.23764	5.24365
YLR104W	15.9915	15.706	15.0136	14.5705	12.8987	12.3726	13.2506	12.639	13.1189
YLR105C	9.06025	7.7511	7.58575	6.86366	6.59654	6.49161	6.86327	6.45772	6.16362
YLR106C	2.26987	2.0454	2.15151	2.3698	3.07269	3.27905	3.19066	3.93772	4.15674
YLR107W	7.07371	6.77605	8.20692	8.40867	5.49342	5.2603	4.80516	5.26222	5.13103
YLR108C	7.762	7.36635	6.69935	4.92528	2.26842	1.39508	1.73999	1.91673	2.37749
YLR109W	152.399	159.647	157.425	100.603	36.7936	12.6659	14.0987	17.7112	23.1421
YLR110C	149.86	183.217	315.102	365.09	506.768	516.145	520.99	466.998	517.101
YLR113W	7.6707	7.56673	11.192	12.4096	16.9632	18.0135	19.9544	19.4518	19.599
YLR114C	7.78195	7.44308	7.71423	7.53604	7.43037	7.69029	7.32665	8.028	7.69408
YLR115W	4.42584	4.21213	4.2892	4.46146	5.05744	5.38172	5.59207	5.66082	5.94383
YLR116W	6.20324	5.84294	5.55779	5.571	5.91835	5.99349	6.37628	6.40355	6.00983
YLR117C	6.73066	6.14916	6.0901	6.16009	6.2727	6.87198	5.77444	5.30145	4.79433
YLR118C	10.1116	9.67141	9.45898	8.48305	7.39337	6.57155	6.91016	6.05785	5.93623
YLR119W	8.08077	7.32635	6.39731	6.0654	4.42265	3.73724	4.29951	4.06488	4.05736
YLR120C	11.5782	11.8836	19.0873	16.6936	11.5046	6.30464	6.24096	6.31934	6.64459
YLR121C	9.56684	9.34622	11.1679	9.0839	6.6111	4.57956	4.36376	4.21423	5.14228
YLR125W	5.40899	4.64764	3.20944	2.67187	2.27414	2.90949	2.51679	2.22071	2.02527
YLR126C	9.31189	8.32657	7.26493	7.04762	6.25308	6.53772	6.23146	5.47628	5.39221
YLR127C	3.86712	3.2424	3.2092	3.11997	2.82113	2.78142	2.89877	3.25239	2.93185
YLR128W	7.07376	6.62708	5.46634	4.89373	4.35362	4.15977	3.88653	3.40615	3.29087
YLR129W	3.41218	3.51483	4.67355	5.96168	7.28531	8.37948	8.30073	10.1259	10.7088
YLR130C	10.3857	10.4648	12.1817	12.6567	13.2758	15.1104	16.0777	19.7311	24.1102
YLR131C	4.17725	3.70851	4.31275	4.49255	6.35085	7.08887	6.63413	8.079	7.58194
YLR132C	4.30021	4.30684	4.04057	4.00405	4.45908	5.01745	6.30906	5.75705	5.93645
YLR133W	5.6482	5.11363	5.51141	6.01893	7.25266	7.40808	8.85238	9.13159	9.41988
YLR135W	4.10747	3.53406	3.19033	3.06839	3.04345	3.47145	3.34697	3.3415	2.9115
YLR136C	6.82005	5.28056	4.12293	2.54282	1.30849	0.989815	1.38579	1.33063	1.41966
YLR137W	3.58949	3.32224	4.23134	4.48366	4.36576	3.9996	4.44653	4.48029	4.57978
YLR138W	6.79379	6.49272	8.05755	7.83031	7.20403	6.86607	6.3669	6.75477	6.92944
YLR139C	2.82139	2.40096	3.27989	3.58323	5.26487	6.16905	7.6932	8.22587	8.64095
YLR141W	4.47845	3.91509	4.81355	4.23374	4.53401	3.92436	4.09697	3.61766	4.21438
YLR142W	17.3419	13.7434	12.6009	11.3568	14.1625	15.4045	12.8313	4.29594	2.34896
YLR143W	3.45003	3.11773	3.27499	3.50805	3.72525	4.21356	4.51044	4.60853	4.6162
YLR144C	4.75395	4.26792	3.75759	3.56815	3.21658	3.34628	3.38953	3.32306	3.16284
YLR145W	7.80862	7.25953	7.45205	7.19503	7.32376	6.75599	7.12317	6.33571	6.73007
YLR146C	4.34141	4.28481	4.81352	5.76583	6.43535	8.07642	7.98513	8.73033	9.18744
YLR146W-A	32.8342	26.5386	24.9012	26.3379	23.274	28.1244	25.1639	24.6971	30.3172
YLR147C	13.3779	12.356	12.6622	12.1444	10.9399	10.2128	10.8411	8.45038	8.99839
YLR148W	4.47174	3.77439	3.68686	3.65995	3.4106	3.51173	3.67319	3.65763	3.65135
YLR149C	17.1846	16.4323	14.0046	10.6652	6.78356	4.71622	4.39217	2.97885	2.10629
YLR150W	66.7836	67.0094	71.8677	75.7955	91.3472	96.2453	91.0031	101.059	116.576
YLR151C	12.813	11.0246	9.94938	8.36375	7.72318	7.33222	6.14739	4.70467	3.66658
YLR152C	11.3657	9.98652	10.3127	9.46931	7.82577	6.40109	5.77678	4.19789	4.06446
YLR153C	25.9602	25.8293	32.8949	33.717	34.6299	31.435	31.5655	33.3877	32.2769
YLR154C	11.7814	11.5861	12.6889	10.9207	11.1019	9.55978	9.2531	10.5128	11.9279
YLR163C	12.3062	11.1735	12.0238	12.6275	14.4437	14.7755	16.3305	14.8942	15.0171
YLR164W	33.6004	29.5869	15.8248	10.1364	3.45991	1.92106	1.77091	1.36786	1.33028
YLR165C	7.21127	5.63698	4.93172	4.60104	3.92446	3.62069	3.05438	3.29581	3.48026
YLR166C	5.2959	5.00227	4.68451	4.73495	4.51921	4.24287	4.06845	4.85833	4.71317
YLR167W	151.938	166.995	217.73	245.524	246.187	304.599	240.07	313.64	397.532
YLR168C	10.0516	11.3483	19.773	28.1695	39.8493	53.391	62.6715	74.1789	71.959
YLR170C	11.9016	10.3574	10.5952	9.7574	10.2227	11.1113	10.4399	9.89747	10.4064
YLR172C	16.8822	17.3332	17.4864	17.9847	21.4092	22.8433	22.5798	22.0263	23.3224
YLR173W	6.14797	6.44483	6.52387	5.35735	4.18373	3.641	3.96067	3.89118	3.66841
YLR174W	44.5895	45.1041	43.1452	41.476	48.0216	44.3881	50.8604	24.382	11.7853
YLR175W	14.8986	15.2384	19.4122	22.7455	27.5935	30.424	29.2681	31.0495	33.4898
YLR176C	2.14116	1.83959	1.54555	1.55007	1.80045	2.01637	2.07334	2.18563	2.07075
YLR177W	6.01058	4.64082	5.11808	4.5905	4.87803	4.55018	4.20082	5.47409	5.79249
YLR178C	53.8212	56.342	57.1018	43.2061	17.1882	6.30601	5.56085	5.26678	4.36983
YLR179C	11.195	10.2749	13.4871	17.4874	25.7834	31.8173	31.7984	26.7288	27.4225
YLR180W	13.5283	16.7404	23.5457	32.2316	47.1677	56.2233	55.5804	57.8299	63.3452
YLR181C	13.4685	12.4102	10.7308	10.3728	11.0308	10.7466	10.9297	8.29106	8.4457
YLR182W	5.4885	5.04353	5.91446	6.00886	7.56875	7.8121	7.11614	7.40366	7.18061
YLR183C	3.63786	4.15909	6.20081	7.4771	8.87817	9.5962	9.59989	11.4765	11.2691
YLR185W	76.691	75.2119	75.9275	85.7563	85.4078	103.962	85.9466	107.601	111.722
YLR186W	8.61987	8.73486	10.8778	12.851	14.5133	14.2465	12.8428	13.901	16.2174
YLR187W	2.36706	2.12082	2.46197	2.59386	3.19732	2.8708	2.72348	3.35787	2.97605
YLR188W	7.70083	7.30313	8.18806	7.48712	7.57011	7.04527	6.90816	6.60321	6.31562
YLR189C	6.42979	5.55353	5.61479	5.03074	4.53959	4.13556	4.09917	4.52368	4.47799
YLR190W	8.90167	8.12064	9.92904	11.1627	15.1941	17.9094	22.0494	19.5202	17.3017
YLR191W	8.30616	7.80566	7.25964	7.71535	7.81587	8.57298	10.9191	9.54511	8.71366
YLR192C	23.9466	22.815	25.3497	25.1425	27.9953	28.7764	29.1859	29.8294	32.7241
YLR193C	22.1431	20.1587	20.2725	18.9158	18.8509	18.721	19.3292	15.6871	15.3811
YLR194C	32.976	27.7855	41.5282	36.0502	22.587	14.5748	15.5928	12.9667	13.1281
YLR195C	9.24048	8.34921	8.05375	8.55517	9.03195	9.30485	9.874	10.4148	11.5138
YLR196W	6.53998	7.24578	9.17376	10.5481	11.2254	12.5618	12.4444	11.7976	13.4172
YLR197W	13.0709	13.7152	17.6688	21.5809	25.6084	29.4215	27.0975	31.1898	31.9536
YLR199C	16.0367	14.5709	14.3284	12.9065	9.99764	9.71342	10.4625	9.69679	9.67924
YLR200W	14.821	11.423	12.1114	12.5479	12.6261	14.1236	15.6616	14.7865	17.2037
YLR201C	17.3812	15.9135	14.1501	12.5359	12.3982	10.785	10.4635	9.73881	9.14406
YLR203C	13.3959	12.657	14.2951	14.6294	17.6889	18.8438	22.4579	19.335	19.2568
YLR205C	18.6903	16.3749	15.7248	16.0729	18.5093	18.7154	26.4412	25.711	24.561
YLR206W	12.0758	11.0187	13.1326	11.5657	10.9794	10.3462	11.5129	10.8048	11.023
YLR207W	4.6736	4.5486	4.71462	4.73059	4.40027	4.10233	3.90568	4.3651	4.40908
YLR208W	20.1027	19.4312	20.3851	21.266	21.7892	21.9137	22.1125	21.2085	21.9222
YLR209C	11.0149	10.1231	9.94233	10.4298	11.456	11.3132	10.7304	11.3877	10.707
YLR210W	3.85387	3.69026	3.83881	3.63276	3.71054	3.83017	3.72352	4.17449	4.04741
YLR211C	11.7973	10.063	10.837	9.6732	7.55895	7.30767	7.46376	6.66932	6.15726
YLR212C	5.94422	5.88894	6.00354	6.28044	7.27535	7.30647	7.25994	6.90445	6.98389
YLR213C	6.62881	5.14507	3.4824	2.46392	1.68922	1.25631	1.36016	1.32014	1.00835
YLR214W	5.69625	6.14744	7.41555	6.94898	5.91272	5.50732	6.69067	7.6836	6.85064
YLR215C	6.0084	5.56872	5.9611	6.19027	7.10177	6.46488	6.58968	6.11927	6.57291
YLR216C	47.473	46.5821	36.8969	28.1007	17.7754	14.7578	15.1303	13.5699	13.8529
YLR218C	7.91954	6.83758	9.73824	9.0111	7.99886	7.61849	8.40842	9.77847	10.1671
YLR219W	11.8847	11.7149	12.6324	10.3631	7.65475	6.12236	6.34038	6.06993	6.17697
YLR220W	25.8827	23.3426	20.9693	19.3684	17.4023	16.6443	15.0878	14.7471	14.6377
YLR221C	9.20221	9.4533	10.7021	12.0593	13.0476	14.6375	16.5773	16.324	18.0951
YLR222C	4.35136	4.45077	5.12784	6.15478	6.88607	7.95199	7.68568	8.15158	8.50715
YLR223C	4.20725	3.70541	4.50944	5.07247	5.4307	5.40686	4.73071	6.90453	6.83916
YLR224W	8.81567	8.14009	8.3635	8.17033	7.5222	7.64064	7.56927	7.03823	7.81938
YLR225C	9.92276	8.78798	8.77469	8.22319	5.73184	4.7623	5.18533	4.83979	4.89849
YLR226W	4.10969	3.82126	4.34478	4.84011	5.01579	5.69451	6.43676	6.27836	5.84752
YLR227C	6.92801	5.75637	4.01281	3.95369	3.96323	4.08334	3.9807	3.85266	3.44833
YLR228C	5.33897	5.70963	5.6416	4.84513	4.7661	4.41375	4.65827	4.06624	4.12028
YLR229C	23.3366	22.5838	24.0223	23.7661	26.2333	26.2147	24.6457	20.6136	20.4174
YLR231C	12.2022	10.5078	8.53604	7.46197	7.32704	6.94727	6.62796	6.84833	6.26283
YLR233C	3.75569	3.16823	3.09718	2.96229	3.28778	3.68797	3.68124	3.83129	3.04054
YLR234W	2.23919	1.82931	2.17835	2.07	2.85071	2.66491	2.70039	2.29695	2.63874
YLR237W	19.5247	19.288	16.4429	14.3482	13.7541	13.2646	9.7972	7.29044	6.2185
YLR238W	4.70474	4.31195	4.71181	4.52768	4.61389	4.70668	5.35303	5.25093	4.84559
YLR239C	8.3897	7.52684	7.66545	8.42808	9.53026	10.3327	12.7778	11.7979	12.5696
YLR240W	4.70171	4.08318	3.91156	3.89168	3.35045	3.39282	3.44576	3.16214	3.05372
YLR241W	10.4159	9.88085	10.4281	9.51384	7.95525	6.91136	6.80859	6.2615	5.92722
YLR243W	8.68802	8.13841	7.22996	7.48757	7.76901	8.10552	7.82916	6.62483	7.10253
YLR244C	14.3524	14.2768	15.7741	16.2742	18.4357	17.7353	16.5333	20.7876	24.5495
YLR245C	4.00625	4.79644	4.81265	5.34353	5.34761	5.31606	5.11899	5.74222	5.23792
YLR246W	7.36822	6.14115	5.18428	4.94516	4.18474	4.10084	3.64967	4.08594	3.62498
YLR247C	5.14134	4.47544	4.74698	4.65058	4.23122	3.7431	3.77647	3.88221	3.87209
YLR248W	16.1185	14.7203	13.8485	12.6247	10.6454	9.58	10.4667	10.8534	10.4648
YLR249W	37.4104	40.104	51.3822	61.8491	78.583	85.0863	73.4685	84.5873	89.387
YLR250W	22.4462	22.5497	21.2526	20.2309	16.6873	15.5804	14.7459	14.0499	13.3047
YLR251W	18.2884	17.2231	13.8821	10.4637	5.42548	3.41171	3.32843	3.89169	3.4875
YLR253W	7.73375	7.55344	9.78114	11.1833	14.8342	16.1857	20.0902	20.2722	19.4682
YLR254C	16.2829	16.9896	16.644	13.4973	8.28921	6.15145	5.63385	4.66167	4.61638
YLR256W	4.4005	5.88046	9.0392	8.08436	6.38379	4.26886	3.86707	3.74139	3.38834
YLR257W	22.2085	24.2366	30.9232	26.2348	16.1792	11.6125	11.8378	12.2912	11.4314
YLR258W	9.45382	9.55944	10.5577	9.15326	6.62147	4.22916	3.70288	4.20391	3.6366
YLR259C	71.0932	60.2529	53.5655	51.0225	54.5377	56.5757	66.9261	63.2147	61.0575
YLR260W	7.06706	6.31037	6.36485	5.89865	5.10075	4.68714	4.60612	4.76653	4.86832
YLR262C	14.2191	12.4274	12.2331	11.5904	11.2682	10.6705	11.9591	10.7324	12.2775
YLR262C-A	75.9534	69.5927	75.0321	74.2319	62.0519	75.2611	60.6382	66.547	79.9235
YLR263W	3.26011	2.78339	2.56572	2.54806	2.63013	2.70931	2.78162	3.34276	2.88023
YLR264W	44.9751	42.2518	36.1448	40.5639	46.0214	67.7839	67.1203	79.0717	76.3616
YLR265C	9.97422	7.95686	6.1928	5.30844	3.97901	3.77825	3.85126	3.50873	3.65929
YLR266C	7.07443	5.94925	5.05292	4.88388	4.40472	4.34639	4.47448	4.78679	4.64949
YLR267W	7.9592	6.16551	4.62251	3.48265	1.89375	1.77169	1.7302	1.2709	1.12959
YLR268W	13.0709	13.0079	12.1461	12.9222	13.4466	13.4741	12.1331	12.9878	12.6398
YLR270W	23.4521	21.8265	18.8485	15.8285	10.2199	6.96875	6.23912	6.51073	6.46722
YLR271W	9.43326	8.50987	7.20526	5.33778	3.36304	2.92802	2.90382	2.72889	2.40964
YLR272C	3.30874	2.99082	3.16259	3.41762	3.66237	4.01537	3.62012	4.33726	4.09449
YLR273C	8.88651	7.23806	4.69008	3.98773	3.41263	3.17172	3.65406	3.11597	2.8435
YLR274W	8.4377	7.35633	6.21541	6.19087	6.33861	6.66594	6.0869	6.61625	6.67412
YLR275W	12.8218	9.63082	10.3222	10.2099	9.01783	8.70565	8.65555	9.28677	10.5063
YLR276C	7.4259	7.91933	8.63385	9.74534	10.2948	11.1892	11.9206	10.8741	11.9262
YLR277C	3.31671	3.31404	3.51751	4.13234	4.79627	5.06141	5.16812	5.80754	5.77411
YLR278C	4.35771	3.96428	3.93021	4.05054	4.48089	5.09575	4.7314	5.30905	4.65594
YLR281C	11.2317	9.17514	8.91126	7.55669	6.48166	5.06337	4.57489	3.7766	4.74545
YLR283W	6.48496	5.8283	5.58151	6.23485	5.95783	6.28976	6.80329	6.57822	5.91949
YLR284C	27.2604	21.1137	13.4966	10.2061	8.15017	6.45991	6.65749	2.2738	2.11209
YLR285W	6.60068	6.98258	7.9377	9.0553	9.59794	11.1162	12.0307	13.2501	14.25
YLR286C	17.8388	14.4958	31.8309	34.6235	40.9554	42.2409	45.7309	55.959	60.976
YLR287C	9.1023	8.00776	8.56541	8.66345	8.22099	8.09999	7.85236	8.16817	9.23512
YLR288C	8.83365	7.57617	6.11591	5.285	4.02469	3.60455	3.88181	3.76362	3.5584
YLR289W	4.41817	3.55569	4.27696	4.57735	5.44038	6.35459	7.70406	8.13913	7.63121
YLR290C	11.4423	10.2358	10.1604	9.11283	5.21329	4.44495	4.37652	3.94806	3.4717
YLR291C	9.09307	8.43759	8.08571	8.38873	8.74898	8.69176	8.84523	8.5453	9.42077
YLR292C	16.0326	14.8033	16.0335	15.7725	13.946	13.054	14.6731	13.0975	15.6879
YLR293C	26.4728	27.9754	31.7059	36.2748	41.8454	47.6204	47.4128	51.7831	55.5116
YLR295C	46.4066	48.8974	59.4876	69.0756	81.8565	97.7141	111.355	95.699	85.2477
YLR297W	20.216	17.7225	15.6878	11.4385	4.81667	2.76437	3.3789	3.59383	3.02765
YLR298C	11.0928	8.38091	8.89506	9.36542	7.32835	7.46759	8.01915	7.4987	6.84008
YLR299W	10.1033	9.08152	9.58155	8.2829	7.93524	6.4012	5.82318	5.27068	5.16019
YLR300W	36.8549	40.8028	42.0499	40.7682	35.1593	35.3242	33.818	46.2078	52.6153
YLR301W	13.3896	13.1811	15.9504	18.0508	15.857	16.3577	13.9283	16.8564	19.1939
YLR303W	69.0705	79.8263	99.012	109.087	134.834	135.405	128.668	116.869	115.154
YLR304C	44.8053	43.909	46.8534	48.707	60.5401	70.3971	80.83	78.6947	68.8418
YLR305C	3.4437	3.1751	2.96865	3.18813	3.63768	3.75148	4.04977	4.31437	4.27642
YLR307W	8.79917	5.38961	3.09513	2.32425	3.05619	4.14529	3.58002	1.73747	1.00002
YLR307C-A	54.5719	44.668	38.9726	34.1845	20.3753	7.12087	5.25116	1.10979	0.42376
YLR308W	2.85211	1.30354	0.580585	0.384711	0.259409	0.176545	0.196204	0.162383	0.11303
YLR309C	6.60876	5.46611	5.49681	5.47951	6.0016	6.61534	6.57573	6.90773	6.44065
YLR310C	6.84965	6.36382	6.24398	5.8819	6.14302	5.61255	5.45935	6.20335	6.21747
YLR312C	27.4275	24.804	20.0651	15.1303	10.2503	7.00656	5.89287	3.91454	3.60035
YLR312W-A	10.2773	9.7381	14.0286	16.798	20.8842	24.574	29.4247	33.2135	36.435
YLR313C	3.57757	3.6249	3.74362	3.61857	3.86782	3.66877	3.49601	3.34853	3.52539
YLR314C	11.7518	11.517	13.5648	13.7436	15.1296	16.5431	17.7996	16.1861	16.5467
YLR316C	9.11616	8.32788	7.35651	7.23597	7.35432	7.1682	7.13615	7.36131	8.06968
YLR318W	4.31022	3.44086	2.50508	2.25195	1.99038	2.15725	2.08151	2.19695	1.95946
YLR319C	4.82817	4.15884	4.45649	4.74896	5.00652	5.64365	5.30917	5.84939	5.39486
YLR320W	2.601	2.06486	2.01207	1.96232	2.23159	1.98225	1.88928	2.23754	2.28298
YLR321C	6.73617	6.43915	6.8827	7.11305	8.13256	7.92812	8.39756	7.35986	7.52783
YLR323C	5.5036	5.06129	4.90315	4.61714	3.98928	3.93202	4.51656	3.96482	4.40497
YLR324W	10.7743	10.3205	9.86263	8.82024	7.41518	6.76416	6.75457	6.10625	5.9731
YLR325C	99.7303	94.6379	101.768	109.84	123.747	146.867	138.185	156.748	176.9
YLR326W	10.9547	9.53937	8.84628	9.06232	13.9104	9.97447	8.07175	10.1958	9.42984
YLR327C	451.619	433.052	327.469	216.461	137.636	99.8572	92.5973	51.5838	46.8667
YLR328W	9.13494	9.69807	10.6113	9.94017	9.05069	8.33417	8.17704	7.33645	7.69619
YLR329W	2.48561	2.07655	1.74842	1.86976	1.79451	2.05414	2.17739	1.87559	1.63091
YLR332W	6.51632	6.54107	7.49361	7.98312	8.68803	9.98741	11.9588	10.4613	10.3685
YLR332W	12.0037	10.4622	10.5091	11.8977	12.6511	14.8162	14.8014	14.7762	13.4324
YLR333C	51.0191	47.9618	49.9021	54.5881	52.4579	62.7119	53.9864	70.5327	78.3513
YLR335W	9.2494	8.87077	9.595	9.82502	10.3918	11.0763	11.0783	11.401	12.2733
YLR336C	4.26105	3.86438	3.96035	4.08972	3.9302	4.23856	4.43491	4.69558	4.86718
YLR337C	6.76966	6.63685	7.57144	6.84188	7.02646	6.19733	5.892	5.59865	5.39646
YLR340W	53.0153	56.8452	62.0346	73.4667	100.028	108.262	103.323	118.122	122.932
YLR341W	0.520259	0.325445	0.629579	0.729506	0.966562	1.22096	1.27775	1.85677	1.64493
YLR342W	9.64067	8.94559	11.6516	12.7913	15.4404	14.544	13.9092	18.0306	19.6446
YLR343W	4.29451	2.39915	1.39671	1.50888	2.17427	1.16478	0.87577	1.23523	1.44804
YLR344W	65.3608	64.1608	68.1938	73.0963	83.8855	97.1025	88.4393	103.677	113.128
YLR345W	23.1565	20.0568	16.6283	13.6751	9.96155	7.87649	8.16823	6.70802	6.19833
YLR346C	42.5778	26.1228	11.2275	6.7829	1.84025	1.25251	0.767343	0.55579	0.65645
YLR347C	8.82596	8.08549	7.73679	7.73536	7.488	7.55063	7.25009	8.39846	8.7806
YLR348C	25.9381	25.4136	29.5563	27.7257	31.8717	29.1987	27.5154	16.3124	17.9186
YLR350W	21.2369	20.6725	25.6796	24.2152	21.221	14.631	14.5335	13.9131	16.2632
YLR351C	14.1828	13.6535	13.8193	14.6946	15.958	15.7475	15.887	16.2539	16.2306
YLR352W	5.82754	5.16947	4.85846	4.39017	4.14603	4.03735	4.09577	3.8	3.40349
YLR353W	7.2815	5.66023	5.08713	5.19287	6.02452	6.62123	6.48873	6.22253	6.16915
YLR354C	61.6613	69.1642	68.8986	64.9972	66.9333	67.1364	63.0914	50.6654	52.5864
YLR355C	59.9966	74.9893	101.975	115.57	129.99	138.029	127.295	120.684	131.325
YLR356W	34.8161	32.1442	30.8244	24.1189	13.6625	8.31992	8.37681	5.7482	5.41618
YLR357W	3.79804	3.6535	4.67671	5.35388	6.80897	6.65687	6.23479	8.05373	7.97019
YLR359W	21.8032	23.6818	28.1046	35.8125	43.3079	47.4249	45.9321	45.5976	48.7891
YLR361C	7.02157	6.37149	5.58903	5.3177	4.71794	4.5865	4.37589	4.54434	4.468
YLR361C-A	23.257	16.2459	14.806	12.8641	10.485	11.0018	11.3158	10.9168	9.85848
YLR362W	7.87618	7.14109	5.9614	5.04653	4.02551	3.47167	3.40471	3.40587	3.28982
YLR363C	6.72299	5.74909	5.04377	4.93213	4.56919	4.71632	4.82737	4.59719	4.81881
YLR363W-A	10.8241	10.2787	11.6386	13.0821	11.5898	13.7503	13.0057	13.0889	11.5764
YLR364W	14.1135	13.1661	12.1594	14.9329	21.9344	28.2119	33.43	41.8037	44.7802
YLR367W	33.3189	41.2042	52.1965	57.2228	55.5447	62.1887	55.8285	70.9723	80.2827
YLR368W	5.93557	4.98604	4.42514	4.40877	4.3197	4.39485	4.38726	4.56387	4.05192
YLR369W	7.15275	6.58629	7.21616	7.15627	6.91962	6.69865	7.46306	6.76216	6.73482
YLR370C	22.5829	21.9598	22.3056	20.7896	18.3508	17.8809	18.0554	13.9584	13.7272
YLR371W	4.13075	3.76896	3.98443	3.68508	3.91429	3.6868	3.03747	4.0248	3.87359
YLR372W	12.4301	13.8496	20.1022	25.2202	30.1242	34.5895	32.9034	39.5575	41.2233
YLR373C	3.99122	4.00786	4.58354	4.66303	4.76512	5.03192	4.792	4.65197	4.54394
YLR375W	11.3508	11.5564	11.0633	10.3256	10.2135	9.0581	9.4002	9.00831	9.37917
YLR376C	6.19982	6.11844	5.2289	4.77899	4.18264	3.54536	3.53158	3.50789	3.66625
YLR377C	5.82386	6.94806	8.85278	8.55276	8.76293	5.56421	6.29847	3.6494	1.63496
YLR378C	22.924	22.9445	26.6804	25.7484	26.9727	23.5429	25.1836	25.4249	26.1285
YLR380W	9.11579	9.69608	10.525	9.69084	8.68185	7.0813	7.44901	5.81028	6.10091
YLR381W	4.21008	3.80276	3.68921	3.89157	4.00514	3.88181	3.71091	3.91151	3.77134
YLR382C	5.00259	4.65003	6.29756	7.05744	9.27981	10.585	12.0684	12.7518	12.3978
YLR383W	3.70991	2.98773	2.9077	3.1396	3.39582	3.75143	3.34477	3.80624	3.67654
YLR384C	5.64667	5.35015	5.26642	5.78724	6.59294	6.35688	6.2516	7.09253	7.52616
YLR385C	1.37912	1.61564	1.56369	1.72758	2.43257	2.52896	2.50085	3.60797	2.74785
YLR386W	4.34481	3.96291	4.08261	3.88549	4.11384	4.02582	4.0034	4.11023	4.1266
YLR387C	14.0539	13.1358	13.9076	12.889	11.2496	9.39496	9.01087	8.74413	9.69569
YLR388W	45.1645	46.923	64.8456	70.5577	85.1205	104.308	94.7929	117.433	145.641
YLR389C	5.28232	4.81641	4.63002	4.87922	5.32937	5.3957	6.11289	6.71647	6.95109
YLR390W	12.6348	10.5274	12.5892	12.2455	15.2688	16.0471	21.1442	20.8231	21.1436
YLR390W-A	57.1836	59.1761	72.808	64.3177	60.5598	53.8532	55.434	50.0223	54.1606
YLR392C	7.02715	6.47816	6.09864	5.75931	5.55721	5.58981	5.77516	5.74667	4.58126
YLR393W	3.82446	3.35895	4.55562	5.03689	6.55651	7.94223	10.2872	10.8183	9.65104
YLR394W	4.4099	4.3835	4.73929	5.55477	7.84192	8.46421	10.9602	12.1974	11.554
YLR395C	52.0946	55.8214	57.0883	60.9725	69.0216	81.4026	85.8613	89.2032	82.0318
YLR396C	4.95583	4.20482	4.5869	4.71157	5.25851	5.48578	5.35541	5.92552	5.13757
YLR397C	3.49943	3.54927	3.69739	3.98048	4.66818	4.95091	5.16255	5.3242	5.86447
YLR398C	3.24635	3.37361	3.95451	4.38141	5.15345	5.267	5.23713	6.66652	6.42194
YLR399C	9.43951	10.4695	15.099	13.3543	12.4138	12.438	12.0217	13.6288	13.528
YLR401C	5.19816	4.82869	5.35596	6.01014	7.7321	8.64516	9.18176	9.38663	9.54951
YLR403W	7.58566	7.29332	7.87291	7.37406	6.60824	6.73213	6.6296	7.28206	6.70015
YLR404W	7.00852	6.78609	6.31795	6.50214	6.39212	5.58733	5.93509	5.24828	4.83148
YLR405W	4.48292	4.06539	4.91627	5.73056	7.41942	8.40312	9.05718	9.47656	9.68054
YLR406C	59.1687	54.6126	61.7534	67.202	81.6979	100.535	93.2366	108.924	121.799
YLR407W	15.3679	12.6379	10.6467	10.7417	8.27039	8.91194	8.48792	7.57055	8.74296
YLR408C	10.8816	8.99904	7.64842	6.46907	5.63734	5.60237	5.07361	4.88692	5.33051
YLR409C	3.82147	4.3012	5.38786	6.47356	7.53401	8.51829	8.12853	9.39728	10.2788
YLR410W	5.86171	5.29593	5.64615	5.84073	6.33597	6.42968	6.55788	7.04506	7.29537
YLR411W	46.8525	44.0042	34.8118	29.1824	25.2818	24.3621	30.0989	36.5541	28.2422
YLR412W	8.20787	7.42511	6.88722	7.23825	7.5251	8.24562	9.04322	8.62492	8.85607
YLR413W	3.78403	3.22908	2.61185	2.86897	3.12481	3.35614	3.72417	4.6549	8.47057
YLR414C	18.9847	16.5919	23.8901	24.1395	16.8057	11.8745	10.9362	10.3867	10.2444
YLR415C	0.830684	0.593037	0.952968	0.883545	0.598126	0.412801	0.576783	0.415576	0.398557
YLR417W	5.35584	5.02963	5.10952	4.84441	4.27101	4.52569	4.43594	4.5839	4.20561
YLR418C	7.30447	6.72799	7.40733	7.80358	7.8961	7.73569	7.43162	6.48968	6.23347
YLR419W	3.62753	2.79378	2.52385	2.91577	3.8028	4.36926	4.89292	5.27759	5.50621
YLR420W	8.67816	8.80021	8.84526	9.95083	10.7378	11.419	11.9957	10.6998	11.8094
YLR421C	25.7024	23.3311	23.4099	22.7775	20.1281	20.2284	21.3434	21.2658	23.4157
YLR422W	2.98704	2.60839	2.52182	2.38961	2.44414	2.4013	2.26546	2.77683	2.78794
YLR423C	6.00502	5.49368	4.99991	4.14724	3.01534	2.63252	2.69229	2.60781	2.40339
YLR424W	3.77742	3.19137	2.96679	2.87714	2.56039	2.95485	2.73387	2.71627	2.63355
YLR425W	2.32305	2.20907	2.34711	2.40275	2.42351	2.49956	2.21279	2.60757	2.63741
YLR426W	7.16066	6.01228	6.74102	6.38459	6.40817	5.87407	6.08393	5.9401	6.34326
YLR427W	6.91845	6.45721	6.58079	6.37773	5.99818	5.58596	5.88572	5.84292	5.92026
YLR429W	9.17253	9.90407	12.4216	12.9837	15.3863	15.9698	15.8537	15.9637	15.7754
YLR430W	3.73963	3.19757	3.26249	3.4145	3.83038	3.55968	3.70643	4.39435	4.34987
YLR431C	11.0674	10.475	7.9838	6.30561	4.01349	3.00457	3.01803	2.29665	1.89516
YLR432W	21.7424	19.7226	16.8962	17.9551	25.0776	29.9516	28.8234	26.1063	25.5898
YLR433C	8.49047	7.07493	5.44416	4.53958	4.12972	3.69836	4.64067	4.23277	4.06186
YLR435W	8.36234	8.04495	8.69689	9.90862	10.6985	12.2485	12.4071	12.4059	14.1761
YLR436C	5.17957	4.8991	4.94627	4.69586	5.23449	4.96016	4.55049	5.02988	4.98173
YLR437C	8.67484	6.99884	9.20823	10.5264	10.9324	10.61	9.38708	6.63478	7.07255
YLR438W	16.6864	15.3559	12.6955	8.98332	6.52368	4.09781	3.04311	1.19821	1.11878
YLR438C-A	18.1702	18.1011	23.0243	22.3302	23.531	26.6933	27.4528	24.2493	24.666
YLR439W	9.15418	8.66846	12.0478	15.4385	23.182	26.9458	35.8188	39.7568	37.7712
YLR440C	6.54653	5.45808	4.65969	4.33749	4.43191	4.15584	4.14761	4.18651	4.1637
YLR441C	74.1355	70.8968	78.2569	88.0797	95.5273	114.275	100.067	118.684	134.88
YLR442C	3.87303	3.61818	3.66108	3.63357	3.54734	3.79753	3.31898	3.8875	3.66305
YLR443W	7.66367	6.77532	6.27468	5.73111	4.77323	4.77562	5.0148	4.59127	5.06939
YLR445W	2.02093	1.33281	0.558895	0.34768	0.244224	0.2133	0.153488	0.310764	0.258424
YLR446W	5.17045	4.54702	3.34624	2.91437	2.79038	2.78487	3.25462	2.98253	2.91528
YLR447C	21.7685	20.9674	21.5543	20.7428	19.5843	19.126	17.2845	20.2619	21.7072
YLR448W	39.4071	38.7008	44.7172	51.8605	56.4555	68.2928	66.4259	80.9404	87.6275
YLR449W	10.773	10.0143	11.1948	12.4616	14.0363	14.8489	16.4393	15.049	16.1268
YLR450W	6.66385	6.17758	5.81155	4.98423	3.97776	3.40833	3.60586	3.24413	3.01046
YLR451W	5.69366	4.75006	4.60091	4.77886	4.9393	5.23622	5.07589	5.36968	5.31606
YLR452C	3.90077	2.86311	2.44799	2.95006	3.75531	4.66343	7.21396	9.09399	8.85543
YLR453C	3.3543	2.66746	2.73769	2.58226	2.23712	2.56667	2.84904	2.44494	2.18529
YLR454W	3.85398	3.16214	2.77876	2.61037	2.06245	1.96283	2.16269	2.69179	2.39874
YLR455W	7.85165	7.00042	6.57864	6.48433	6.46582	7.3866	7.98065	8.18574	8.29819
YLR456W	7.56362	6.04972	5.70133	5.00243	4.13254	4.35503	4.15807	4.93822	5.17277
YLR457C	9.5543	7.80021	5.93088	5.01735	4.05909	4.12775	4.33057	4.25348	3.9165
YLR459W	7.40011	7.65792	8.44724	8.32375	8.54446	8.33008	8.63355	8.65506	9.01908
YER190W	110.766	108.806	115.176	112.127	144.868	138.032	126.902	163.402	138.786
YML131W	63.759	71.6958	47.6897	35.0594	19.4392	10.6806	7.72509	4.45804	5.65042
YML130C	8.99691	9.03923	11.2889	11.5138	10.2046	8.30352	8.0517	9.422	10.803
YML129C	33.8495	30.3633	31.993	33.8005	40.2886	43.2899	46.4368	49.2465	45.3816
YML128C	85.3008	95.5654	89.6405	60.5657	17.7659	3.12278	2.87079	2.61214	2.30491
YML127W	6.64557	6.75985	7.25541	7.06187	7.16992	6.95075	6.80408	6.95685	8.02668
YML126C	22.305	26.8728	34.3971	36.5695	34.237	28.7009	28.2431	29.4946	30.3629
YML125C	13.3814	14.619	15.0541	16.1358	14.4689	15.1302	13.3626	13.8533	16.5189
YML124C	9.00183	9.63606	12.1041	13.6912	17.1489	18.1346	16.9379	17.7049	18.163
YML123C	3.62608	4.29587	5.49995	4.50583	4.04239	3.87682	5.09879	5.31788	4.91769
YML121W	11.0048	10.5989	9.49822	9.56369	8.3705	7.93258	7.37537	7.32139	6.88836
YML120C	20.214	27.699	35.2024	38.8364	52.4995	55.1285	60.8858	54.3769	44.775
YML119W	6.97663	6.95339	6.04137	5.68731	6.08869	6.18553	7.38217	6.91905	6.59319
YML118W	2.1311	2.11842	2.15936	2.11674	1.44793	1.16335	1.0784	1.31409	1.12275
YML117W	7.02015	6.53276	7.28583	6.96044	6.61011	6.04344	6.45452	7.26646	7.06569
YML116W	6.1575	7.70113	11.0472	10.4284	7.19642	5.33287	4.99044	6.7337	9.27408
YML115C	13.0689	12.7168	12.7965	12.5861	12.2602	11.7103	10.8656	12.6855	12.7012
YML114C	5.18442	5.47054	5.55555	5.7828	5.90046	6.11804	6.88196	6.53782	6.60853
YML113W	7.66635	7.68352	7.81013	7.71932	7.64864	7.54553	8.81055	7.25994	7.47798
YML112W	7.79771	7.80994	7.67605	7.62909	7.49906	6.63095	7.56421	6.43739	6.76178
YML111W	3.66913	3.58777	3.82778	4.11221	4.32876	4.68973	4.74988	5.15306	5.28741
YML110C	21.9546	22.395	21.5849	20.8981	22.1685	23.348	28.9811	28.1222	28.0522
YML109W	3.60442	3.81497	4.3935	4.74697	5.62502	6.21552	5.52128	6.14251	5.67419
YML108W	10.3744	9.94501	9.61356	10.0782	8.93143	10.1004	10.2157	10.7402	12.0601
YML107C	4.71608	4.57378	4.20788	4.39234	3.70295	4.65404	4.55711	5.03191	4.49163
YML106W	24.0787	25.9648	24.9227	27.1198	32.2755	36.3673	35.6214	34.4841	34.7644
YML105C	12.2212	12.5122	13.1997	14.4938	15.9667	15.599	15.3366	14.6944	15.7155
YML104C	3.25585	3.28654	3.57285	3.57844	3.71525	3.69108	3.99218	4.37122	4.11491
YML103C	3.45167	3.46875	3.67701	4.22514	4.98245	5.00567	5.03603	5.80112	5.91901
YML102W	6.2153	6.31185	6.05984	6.09969	6.98167	6.19371	6.02459	5.81693	6.08981
YML101C	9.13298	8.79642	12.0878	11.0884	11.2754	9.96869	10.3252	9.6214	9.69369
YML100W	9.7586	11.5685	15.0503	11.9206	6.57875	2.64313	2.90181	3.23203	2.48133
YML099C	4.7116	4.47745	4.44323	4.51059	4.6339	4.58132	4.78495	5.46255	5.52986
YML098W	17.4248	16.1859	16.9687	15.9184	13.2313	11.5378	10.8569	11.3298	12.0012
YML097C	5.05963	5.61775	6.03173	7.28439	7.06471	8.0596	9.12544	7.95538	8.07663
YML096W	4.83599	4.58847	4.44476	5.20455	5.68258	6.28345	6.53141	6.5804	6.59289
YML094W	11.0975	12.4106	11.6474	12.713	13.8377	13.8941	14.0899	12.3572	13.3566
YML093W	4.23168	4.60497	5.87057	7.14817	8.86305	9.52018	9.26302	11.0666	11.4464
YML092C	27.0547	29.6616	30.0525	29.3283	26.2497	22.9362	22.4387	20.3286	21.6362
YML091C	9.19814	9.8466	11.332	14.4098	20.1117	24.2962	25.203	31.6976	31.272
YML088W	6.47545	6.42607	6.74344	6.35547	5.3497	4.7931	4.8842	5.49917	6.29509
YML087C	7.45311	8.03511	10.5548	12.4075	16.0227	19.6933	30.393	41.6889	34.6284
YML086C	14.2747	15.8477	14.8927	13.5564	13.4438	12.1159	12.5185	11.537	10.7815
YML085C	15.6506	19.2411	23.3358	26.5421	30.4558	29.6207	24.5484	23.4021	23.207
YML083C	2.4232	1.73319	1.28808	1.4161	1.67161	1.91256	1.7942	1.88373	1.55202
YML082W	3.06415	3.35943	3.85841	4.56425	4.66228	5.48038	5.15538	5.7729	5.9469
YML081C-A	54.4354	57.5298	64.3304	69.7442	83.2004	95.5466	95.6426	92.5497	81.2767
YML081W	2.80614	2.9376	3.87435	4.15795	4.72132	4.8029	4.44517	5.82896	5.8962
YML080W	4.96419	5.94329	6.47407	7.29193	8.23808	8.82381	8.92155	7.97749	8.35162
YML079W	20.0763	20.9723	19.4627	19.2402	17.4381	17.4065	18.1507	15.4248	13.9107
YML078W	23.7532	26.4616	26.0876	28.5683	31.2888	32.3401	30.853	32.5646	28.2545
YML077W	9.33878	10.1822	10.544	10.1504	10.0429	9.82094	9.57309	10.2042	9.9102
YML076C	3.6929	3.66561	3.37481	3.53718	3.61282	3.55034	3.90667	4.04619	3.89286
YML075C	10.4719	16.5075	26.0072	24.745	20.0123	15.0597	12.2113	11.428	11.7641
YML074C	17.0242	18.1813	19.1867	20.9241	24.4845	22.5816	22.7913	21.4324	22.5883
YML073C	54.28	57.5707	55.7924	65.9217	69.3798	83.9185	72.8548	90.7273	91.1566
YML072C	5.70968	6.00798	7.34301	7.77508	8.19465	8.85238	9.4107	10.4017	10.6508
YML071C	6.51123	6.41213	5.70923	5.5784	4.91119	5.02229	5.48264	5.17207	4.78729
YML070W	16.0059	15.9925	13.4714	12.472	10.3465	8.51274	7.5697	7.51643	7.48813
YML069W	12.7802	13.4897	14.7419	14.1741	13.9262	13.8587	12.587	12.2997	12.1513
YML068W	5.48684	5.23916	4.32002	3.83486	4.22545	4.23957	4.2887	4.59333	4.19548
YML067C	11.2337	11.594	11.956	11.6373	10.3774	10.1695	9.53586	10.2093	11.1377
YML066C	4.63377	2.87579	1.95305	1.55368	1.55009	1.33888	1.51584	1.85816	1.66335
YML065W	4.69834	4.40796	4.2161	4.36225	4.22283	4.7093	4.38956	5.17249	5.29649
YML064C	5.11417	5.72616	5.77857	5.92377	6.30494	5.84461	7.74783	6.91105	7.50813
YML063W	65.5158	71.9522	81.2104	93.4229	105.011	133.459	128.552	148.195	171.636
YML062C	8.64693	7.8476	7.92463	7.52674	7.35204	7.64323	6.85278	8.26193	7.84157
YML061C	5.43774	5.45389	4.65911	4.72679	4.7329	4.80186	4.30564	4.85361	4.58401
YML060W	3.58557	3.93168	3.97577	4.06028	4.85703	4.89316	5.19989	4.47601	4.77848
YML059C	2.11184	2.18434	2.96902	3.51343	4.98501	5.00904	5.09125	6.25985	6.52326
YML058W-A	2.58091	4.13367	5.13772	4.51525	1.29577	0.875731	0.4748	0.35594	0.48967
YML058W	30.8763	34.0833	35.7996	38.583	39.1529	40.2596	38.7856	40.7655	43.91
YML057W	9.01626	9.77178	10.6436	10.2536	10.0724	8.8227	7.86535	7.47953	7.36078
YML056C	3.75662	5.04328	7.06444	8.8795	10.0635	11.3208	9.55761	16.7667	19.2242
YML055W	13.4084	13.8185	13.5598	14.5614	13.4623	13.8294	12.4162	12.1535	12.4911
YML054C	35.6741	45.2915	41.5283	41.7126	57.7783	63.1105	71.807	50.2247	41.3129
YML053C	14.4574	14.1789	12.8676	10.8662	8.81612	7.81174	8.72121	7.26915	7.03401
YML052W	9.14731	13.3273	19.7947	23.4061	31.4847	33.0607	34.7608	38.562	42.5212
YML051W	5.39809	5.2788	5.21632	5.16069	5.42616	5.58926	6.30831	6.15057	6.03221
YML050W	7.38433	6.26009	5.56073	6.08184	6.78093	7.114	8.40277	8.78725	8.29766
YML049C	3.8362	4.03486	4.41937	4.61479	4.96058	4.82919	4.65616	5.19334	5.34794
YML048W	27.5446	29.3289	32.2371	31.208	32.1098	30.314	30.7112	25.1033	26.8096
YML047C	1.48302	0.880996	0.324685	0.182421	0.182743	0.0861512	0.237147	0.243027	0.15441
YML046W	4.00666	3.93336	4.06466	4.27926	4.6447	5.24266	5.45719	5.73732	5.39121
YML043C	1.60195	1.78762	2.47407	3.52392	3.62417	4.98279	5.43391	6.1251	6.06435
YML042W	30.6227	26.3358	21.1294	18.8619	16.1756	13.7772	16.7798	3.28728	1.99093
YML041C	6.76293	6.77607	6.37689	5.84977	5.26663	5.00196	4.68113	4.41114	4.29345
YML038C	6.27329	6.94673	7.90794	8.46463	7.32757	7.44815	7.42662	8.60719	9.01668
YML037C	1.52958	1.38462	2.08822	1.88663	2.09483	2.31079	2.51076	2.90054	2.75526
YML036W	6.29966	6.76947	7.50328	8.50145	9.48246	10.7175	10.3647	10.1842	9.86018
YML035C	6.07239	5.75984	5.77788	5.9426	6.5839	7.03383	7.56041	7.05178	7.01452
YML034W	7.75718	7.72517	8.58658	7.99008	7.63498	6.89715	6.80665	8.36806	8.24385
YML032C	7.14098	8.77454	10.5881	9.69958	8.90037	9.1782	10.0005	8.4	8.69534
YML031W	7.38687	7.46523	8.66036	9.56388	10.6345	11.3077	11.8706	11.742	12.2242
YML030W	30.4517	30.2829	27.19	26.0859	25.1056	27.0427	30.3705	28.767	24.2843
YML029W	5.82215	6.09256	5.5249	5.32716	5.26933	4.69297	4.4664	4.78726	4.96384
YML028W	74.6923	90.8725	100.988	99.5875	86.6657	80.5114	77.0519	82.5676	78.7724
YML027W	7.29697	8.18124	7.24058	6.88794	7.88343	7.47168	7.7119	8.55454	8.49078
YML026C	73.8587	78.6556	98.5123	110.704	123.299	153.527	134.382	168.611	222.805
YML025C	13.1361	12.4563	13.9508	15.7187	19.8354	20.3411	25.8216	26.5223	28.1767
YML024W	66.8849	74.0454	90.1445	107.904	108.993	138.346	110.549	146.527	161.964
YML023C	4.403	4.68293	4.16299	4.16884	4.6554	4.8958	5.0372	5.38894	5.10091
YML022W	15.6309	16.5896	18.2225	21.3172	22.3401	22.8683	19.4461	19.3491	21.6373
YML021C	3.89643	4.34163	4.40807	4.35726	4.49321	4.71164	4.96216	5.07791	5.27981
YML020W	4.25425	4.43028	4.48509	4.12437	3.92174	4.00674	3.97792	4.10649	3.89055
YML019W	7.77007	7.89718	7.99367	8.63163	8.47662	8.74968	8.78626	10.0556	9.99598
YML018C	7.75123	10.0485	12.3622	14.8313	14.5798	16.1106	15.3545	19.4798	21.749
YML017W	6.76541	6.17426	6.29916	6.08903	6.30128	6.48568	6.70917	7.32293	7.3456
YML016C	8.07548	8.51223	8.20713	8.24939	8.82519	10.5608	11.6631	13.1341	13.2355
YML015C	8.18104	7.79232	7.18558	7.24001	7.22769	7.33229	8.4634	6.83906	6.71725
YML014W	6.46662	6.73204	7.17921	7.26426	8.02694	8.67072	8.27984	7.68343	8.1403
YML013W	10.8637	10.3766	10.1966	9.38388	8.74891	7.10194	7.12151	6.32479	6.26034
YML012W	28.79	32.6779	36.5782	36.4922	33.6927	34.4087	32.1801	34.5472	33.5943
YML011C	6.89356	7.48507	6.05139	6.02296	6.37769	5.74306	5.67754	5.94065	5.7492
YML010W	8.79665	8.45327	8.99735	9.06997	10.0926	9.76638	9.8391	11.5118	11.8995
YML009C	19.0108	18.4875	22.441	27.1568	34.9711	40.1517	50.8908	60.0753	60.6773
YML008C	24.3524	51.4918	92.3443	83.8331	63.4673	41.8544	32.0357	21.6861	21.9943
YML007W	17.5902	18.8486	21.1892	18.97	15.6293	13.6137	13.8156	12.1611	12.3014
YML006C	2.50858	2.96267	3.40529	4.03379	4.43639	4.8853	4.56094	4.4122	4.28145
YML005W	5.64419	5.64152	4.67642	5.00252	4.49307	4.51511	4.52258	3.88117	3.747
YML004C	37.0188	42.8501	40.5231	32.5677	18.1338	13.82	13.1044	11.4702	11.2741
YML003W	2.16419	2.57284	2.50538	2.10515	1.70986	1.29922	1.87953	1.77953	1.43742
YML002W	4.41671	4.49645	3.62304	3.62923	3.09635	3.04422	3.50328	3.65831	3.20611
YML001W	19.1349	18.3805	18.7833	18.6704	17.0088	17.1893	15.0307	16.5525	18.954
YMR001C	3.2738	3.63249	4.37996	4.8727	6.42352	7.67141	7.614	9.1528	8.69391
YMR002W	50.5227	50.3242	59.5631	64.8405	85.652	96.5526	122.163	117.8	125.073
YMR003W	7.50349	7.00268	8.33664	8.85862	9.87522	10.7336	11.5163	9.66706	12.0377
YMR004W	8.79511	8.66411	8.91247	8.70243	7.69852	7.01007	7.43249	6.74214	6.78927
YMR005W	9.69476	10.031	10.2526	10.3748	10.6484	10.8994	12.2931	11.0844	11.711
YMR006C	8.98812	12.1424	13.178	11.9641	12.3487	12.5695	9.7319	5.99372	5.9375
YMR008C	10.3756	10.9874	12.8153	12.5842	10.3626	8.31891	7.68207	7.23322	6.94092
YMR009W	25.786	26.9304	25.465	26.328	30.9309	33.1051	30.5121	20.5083	19.639
YMR010W	5.46144	5.99847	7.72628	9.26301	8.53687	9.58149	10.0154	10.2412	10.3373
YMR011W	29.5518	38.5588	59.054	73.0235	74.4291	68.8862	53.2457	22.4811	27.7246
YMR012W	6.14805	6.84408	9.56313	12.9767	19.2483	23.2797	29.9112	30.3963	30.0944
YMR013C	4.66795	4.43564	3.86719	4.36821	4.04491	4.40169	4.63045	4.79056	4.37135
YMR014W	7.05586	6.90881	7.1739	8.04785	9.24626	9.85581	10.4743	9.92435	10.1751
YMR015C	26.4858	51.0054	83.3863	73.3824	39.698	22.5465	17.1103	20.6344	19.8444
YMR016C	6.06458	5.56896	5.20405	5.00009	5.92366	5.99765	6.95638	5.10667	5.4799
YMR017W	4.34855	2.90097	1.55259	1.17238	1.06966	1.31555	1.43813	0.975968	0.823098
YMR018W	3.8448	3.82415	2.71755	2.15918	1.40954	1.71014	1.56968	1.21789	0.823294
YMR019W	4.56	4.60776	4.91404	4.53458	4.54975	4.32738	4.45328	4.33925	4.58534
YMR020W	7.30846	6.98104	6.69322	5.60785	3.82164	3.00131	3.068	2.69288	2.58617
YMR021C	5.17026	4.9419	4.82516	4.58473	4.25437	4.09996	4.2937	3.93282	4.22019
YMR022W	14.5651	14.1223	14.7933	14.4374	13.3532	12.6181	11.6804	12.5135	12.8136
YMR023C	4.91263	4.47245	4.15179	4.10284	3.56123	3.41114	3.62084	3.58027	3.52966
YMR024W	8.13582	8.39524	10.8666	12.6743	18.2938	20.1126	24.1797	27.1487	28.5212
YMR025W	5.96563	5.10993	4.00664	3.55172	2.77759	2.68852	2.5068	1.9525	1.78674
YMR026C	8.159	8.41987	8.20706	8.00496	7.58821	7.77908	7.59288	6.54748	6.52111
YMR027W	19.206	19.2981	16.1926	15.6434	13.968	12.6199	13.0952	11.6313	10.9205
YMR028W	8.30159	8.14461	7.29235	6.99455	6.65852	5.76404	6.03593	5.44868	5.1651
YMR029C	7.57119	8.34714	7.5954	7.50045	6.5055	6.35987	6.86799	6.12511	5.37124
YMR030W	7.63014	7.25234	6.29926	5.51468	4.70197	4.24104	4.26014	3.08357	2.55569
YMR031C	12.1359	15.0101	18.0023	17.6582	16.4969	14.0026	13.3672	13.0674	11.2868
YMR032W	1.81359	2.18483	3.07753	3.99075	5.89416	6.5325	6.70518	7.70562	7.46544
YMR033W	5.94213	6.36871	8.0525	9.29469	10.6474	12.215	12.5676	12.5159	12.6232
YMR034C	6.23718	6.28801	5.99923	5.58921	3.65611	2.40521	2.13483	1.58934	1.49943
YMR035W	7.53921	7.63486	6.67841	7.45192	6.58396	6.86134	5.94597	6.44986	6.26533
YMR036C	6.06913	6.47656	6.84697	5.90353	4.0965	3.27053	2.8492	2.75494	2.63876
YMR037C	6.69538	7.44051	8.67297	8.11982	7.85697	6.78864	6.41008	7.83109	8.10122
YMR038C	14.6258	15.0628	12.9004	12.8065	11.7182	11.7945	12.0967	11.0155	12.6322
YMR039C	13.9821	13.6247	14.9249	14.1629	12.7593	11.8696	13.3206	12.2564	13.0275
YMR040W	8.26853	6.56388	6.33845	4.97042	2.93441	2.3413	2.68863	3.12421	3.27098
YMR041C	9.29749	9.71977	8.18002	7.29356	5.62812	4.78013	4.85271	3.73566	3.54717
YMR042W	11.415	8.96271	8.36931	8.35657	8.60688	7.9963	7.86149	8.11366	8.72988
YMR043W	12.0348	11.4486	13.3303	12.138	11.8461	10.1075	11.7574	10.2401	11.4441
YMR044W	6.72523	7.29907	7.53385	7.55203	8.22292	8.14075	7.66526	7.89798	7.49031
YMR047C	5.33649	5.57647	6.53635	6.51503	7.69561	7.04942	6.77314	7.48242	7.87677
YMR048W	9.39886	8.65548	6.59057	6.83708	6.71414	6.7748	6.76074	5.79935	5.66383
YMR049C	4.54687	5.40496	7.03916	7.82781	9.69711	10.5719	10.3317	11.2782	11.7255
YMR052W	6.89846	6.44743	5.22417	4.7235	3.91726	3.80216	3.88924	3.37472	2.92034
YMR053C	5.57201	5.41737	4.32723	3.44916	2.1104	1.54093	1.45613	1.52082	1.2485
YMR054W	6.48832	6.65315	7.60326	8.22833	8.72857	8.53782	9.23954	10.3095	10.8139
YMR055C	5.38757	5.81289	4.29701	3.83469	3.29704	2.7364	2.39739	2.67342	2.40702
YMR056C	11.893	12.8718	12.7775	12.4706	12.2835	12.3841	11.3842	7.92584	5.50597
YMR058W	7.80408	8.92903	11.8738	12.5749	14.109	14.757	20.6077	29.0117	29.9423
YMR059W	8.41258	8.09149	6.33171	5.82491	5.21875	4.77815	4.74334	4.84941	4.47413
YMR060C	7.26041	6.99108	7.191	7.16109	7.54452	7.34176	7.02776	7.66221	7.39213
YMR061W	6.36173	6.54733	6.79412	6.84674	7.39048	7.50561	7.55875	8.43258	8.74237
YMR062C	10.1611	17.3915	28.9225	26.1413	17.4964	10.3024	10.0023	11.7856	13.9074
YMR063W	2.6596	2.76822	3.2977	3.45272	3.88516	3.57773	4.05417	4.38514	4.03824
YMR064W	5.85029	6.01466	6.5563	7.16917	8.62622	10.2275	12.5816	12.0185	11.2294
YMR065W	2.89064	2.79049	2.86864	2.95682	3.48834	3.06416	2.89596	3.92378	3.87114
YMR066W	2.85469	2.97796	3.15502	3.37039	3.57396	3.82984	4.22519	4.57803	4.48962
YMR067C	9.78755	10.0831	9.50966	8.36137	7.79746	7.17831	8.66301	7.81812	8.12727
YMR068W	6.48901	6.04238	4.90101	4.12082	3.2483	2.91328	3.16126	3.16723	3.17309
YMR069W	1.18124	1.06973	1.34838	1.06858	1.34812	1.5035	1.52347	1.84345	1.84475
YMR070W	5.6885	5.91538	6.84221	6.84979	7.89355	8.34625	9.33137	9.80751	9.71947
YMR071C	16.6291	17.5319	18.3106	17.7254	15.4884	14.2452	13.4365	15.5267	14.5858
YMR072W	39.5908	42.641	38.4157	34.7989	28.4697	24.7144	23.2158	21.9989	21.5463
YMR073C	10.9225	11.1291	11.0673	10.4025	9.91646	9.518	9.23802	8.33125	8.40121
YMR074C	19.6096	17.2946	18.2799	17.8716	16.8297	18.3468	17.3262	18.1553	20.3731
YMR075W	4.60077	4.5631	4.40689	4.18446	3.78227	3.93543	3.7012	4.47059	4.23849
YMR076C	3.96915	3.86032	3.8423	3.78571	4.0379	3.93969	3.80285	3.6541	3.57834
YMR077C	7.96689	8.55725	8.90324	8.52923	7.75991	6.87992	6.54914	6.82425	6.9292
YMR078C	4.62958	4.20552	4.23477	4.47727	5.04102	5.19961	5.59292	5.43103	5.40871
YMR079W	14.2976	15.6619	15.5526	15.1635	15.1886	15.0041	13.3647	13.8944	14.5155
YMR080C	4.45458	4.74048	5.62124	6.12922	6.85874	6.9572	7.12628	7.17577	7.85292
YMR081C	37.0137	31.9276	15.7481	10.9614	9.90384	7.58428	7.59971	5.86669	4.87663
YMR083W	28.933	28.4949	29.8213	33.2908	39.1167	42.2079	47.5235	46.9815	44.7024
YMR085W	5.17551	4.71367	4.75547	4.23199	2.47096	2.15368	1.91069	1.79514	1.51838
YMR086W	5.6582	6.24088	7.36428	7.05869	6.08399	5.633	5.97598	6.39958	6.16638
YMR087W	6.05022	6.17722	6.68578	6.25716	5.33469	3.89056	3.71825	4.0044	3.89676
YMR088C	8.30054	8.59393	9.36522	9.69912	10.1514	12.0533	11.6865	12.0235	10.7212
YMR089C	10.2088	9.18281	9.73727	9.88072	11.8376	12.6208	15.9173	17.454	17.0017
YMR090W	31.9865	34.4449	27.5894	20.8674	6.48435	2.38015	2.30806	2.92331	2.44771
YMR091C	6.32817	7.0694	7.9308	8.92013	9.26548	10.0987	9.73294	10.8538	11.3888
YMR092C	10.5533	11.0931	11.5012	11.9164	11.6759	11.0049	10.7835	10.809	10.4273
YMR093W	3.92369	4.85312	5.67849	6.67976	7.00167	8.30143	8.63742	8.68509	9.188
YMR094W	2.0747	1.95021	2.44109	2.61132	2.27345	2.16115	2.07465	2.20313	2.40962
YMR095C	6.11143	5.60505	7.74723	7.00703	4.96692	2.88322	2.98087	2.32956	2.45195
YMR096W	24.3552	18.9834	22.7906	18.7338	9.38733	4.10236	3.30947	2.44889	2.13309
YMR097C	8.72152	8.08458	7.85433	6.94116	6.51122	6.19776	6.66931	6.25488	6.21049
YMR098C	6.38058	6.51081	5.86652	6.16483	6.59407	7.17371	7.75484	7.52266	7.4114
YMR099C	20.2406	20.4632	18.102	18.6893	17.8013	17.5858	18.4343	14.2043	14.6184
YMR100W	8.49757	8.2513	8.02427	6.88586	4.83555	5.21327	4.85125	6.08021	5.84779
YMR101C	3.93803	2.64347	1.18005	0.843879	0.476759	0.288456	0.271911	0.300476	0.196634
YMR102C	3.37116	3.72324	4.4162	3.6284	2.97902	2.81002	2.87863	3.96949	3.91572
YMR104C	10.2657	10.911	9.94889	8.64125	9.00501	8.83177	8.24726	6.19272	5.55152
YMR105C	24.2918	25.4926	19.7902	14.9703	8.95127	4.47901	3.80718	4.68264	3.64634
YMR106C	2.78461	2.75586	2.62409	2.62843	2.67081	2.74302	2.94028	2.90126	2.93711
YMR107W	375.594	329.89	266.131	178.472	69.0115	16.1857	5.12456	0.674241	0.493024
YMR108W	22.7287	28.4443	35.6285	35.5843	33.1619	29.3383	31.1283	29.4524	29.7979
YMR109W	3.60465	4.08928	5.24043	5.65559	6.78474	6.62758	5.92868	7.42719	6.93194
YMR110C	38.7929	37.8306	30.0945	24.4242	16.3363	12.0995	11.077	8.06732	7.20928
YMR111C	5.00866	4.68898	4.16492	3.8919	3.53008	3.28644	3.30916	3.02117	2.88593
YMR112C	8.33184	9.48721	8.89002	8.8079	7.73756	7.98205	8.16004	5.68309	6.16351
YMR113W	5.16297	5.34173	5.35782	5.29145	4.66849	4.48036	4.65586	4.77962	4.88864
YMR114C	22.5545	19.7116	14.5117	10.5682	6.73057	5.7916	6.72176	5.18544	4.90501
YMR115W	9.8949	9.9293	9.06769	8.60162	8.27323	8.75268	9.0646	7.8015	7.44118
YMR116C	55.4249	66.1911	64.2913	74.617	84.4684	90.5971	72.8929	94.18	101.819
YMR117C	3.84051	4.13158	4.32227	4.81401	5.01928	4.95728	4.95186	5.43906	5.11215
YMR118C	74.9815	78.0062	40.1102	21.0942	5.0121	2.25256	1.86218	2.08261	2.08688
YMR119W	6.23119	6.42626	6.41622	5.98171	5.51539	5.2285	4.77713	5.09104	4.5016
YMR120C	16.5898	21.8171	27.767	33.8124	42.4855	44.3954	47.8987	57.0609	65.1219
YMR122W-A	77.5596	77.0703	86.169	84.1559	69.1688	66.6658	62.827	71.967	73.0319
YMR123W	10.7322	11.8886	14.4212	17.7446	21.8828	25.6159	27.3774	27.7754	29.2358
YMR124W	5.10084	4.68132	4.70074	4.78495	4.99395	5.56531	6.40746	5.74469	5.39178
YMR125W	7.9083	8.87551	10.3246	11.1016	11.9904	11.914	12.7372	12.8011	12.7593
YMR126C	3.38123	3.42501	3.80711	3.948	3.95901	3.97333	3.53827	3.80575	3.91617
YMR127C	6.22164	5.85057	4.80451	4.82654	4.10457	4.37369	3.79282	4.16266	4.20345
YMR128W	2.94875	2.90194	3.19943	3.65859	4.47489	4.60396	4.24314	4.74985	5.18854
YMR129W	2.95034	3.21007	4.43007	4.97163	5.79344	5.88041	6.16477	6.81285	7.03304
YMR130W	9.24156	9.92146	9.63715	9.54831	9.32437	9.89289	9.80863	9.56719	10.1419
YMR131C	8.79821	10.173	11.218	13.8936	15.844	18.81	19.1436	16.5476	18.6016
YMR132C	4.34296	3.94785	3.88048	4.98134	6.76617	7.05912	7.39163	7.10027	7.7715
YMR133W	3.50597	3.36595	2.51856	2.17944	1.70912	1.5791	2.23511	2.82541	2.5407
YMR134W	8.64024	11.1636	15.6792	16.1483	13.7681	11.2738	11.4929	13.2773	12.2355
YMR135C	15.3128	15.1237	13.6987	12.1265	9.72564	8.37362	7.8152	8.19789	7.48943
YMR136W	23.8452	22.6737	18.7966	13.557	12.4553	10.8906	10.2944	10.2968	10.1735
YMR137C	5.71335	5.0956	4.00743	3.38772	3.05644	2.74789	3.01821	2.68324	2.2641
YMR138W	7.0551	7.51995	6.15361	6.1544	6.87046	6.16953	6.99477	5.74014	6.15433
YMR139W	12.552	12.5668	11.5324	9.98936	7.803	6.99806	7.15181	6.51356	6.04727
YMR140W	7.1567	7.69196	8.34971	7.32522	6.01691	5.259	5.01242	4.91551	4.77571
YMR142C	68.993	79.8643	82.7727	95.8146	104.446	121.933	98.5243	118.356	123.738
YMR143W	65.4366	69.5248	70.1869	75.448	75.8604	93.7662	82.3012	93.9758	108.252
YMR144W	4.89205	5.30031	5.96261	6.16187	7.34948	6.46019	5.55436	6.14541	6.27199
YMR145C	41.2619	44.6502	45.4039	50.4473	69.7437	75.9578	81.0039	71.492	69.6227
YMR146C	23.4515	25.2405	26.5067	29.344	35.5988	37.8139	38.4441	38.1329	40.0698
YMR147W	8.8948	10.4511	8.69074	8.85113	8.42628	6.81905	6.13344	3.32643	3.45284
YMR148W	17.939	18.6807	15.9733	14.7564	13.7489	11.6825	11.3307	9.1086	8.61517
YMR149W	12.4289	13.9588	16.9894	16.3935	16.7692	15.1668	13.5688	15.0374	16.2337
YMR150C	16.8335	15.5949	15.5035	14.9912	13.6824	14.9219	14.806	12.7346	13.9242
YMR152W	28.6714	26.6473	19.0768	15.6401	11.1083	8.7489	8.10042	6.5906	6.20862
YMR153W	7.12235	7.00453	7.29554	7.19872	6.76221	6.70547	6.8565	6.23815	6.79098
YMR154C	3.50254	3.00697	2.55742	2.24777	2.2589	2.39208	2.23462	2.45709	2.05103
YMR155W	6.60998	6.90123	6.35894	5.95913	5.10772	4.53158	4.15941	4.36665	4.25335
YMR156C	8.26804	7.56565	5.7402	5.7918	4.74034	4.74233	5.15653	4.24021	3.76845
YMR157C	9.0027	8.34383	9.93786	11.5412	13.9408	15.5923	19.8876	20.5588	19.7966
YMR158W	10.836	10.4796	11.9083	14.6626	17.2739	21.6564	24.9912	26.0373	27.1192
YMR159C	7.09555	6.25804	5.48557	4.37876	2.89549	2.31877	2.93218	2.6052	2.22651
YMR160W	5.81661	5.58366	4.94278	4.44535	3.79027	3.3536	3.44183	3.38281	3.39036
YMR161W	11.0119	11.3009	11.1116	10.0932	8.42613	7.99995	8.55887	8.02554	9.00461
YMR162C	3.46304	3.38381	3.51873	3.60519	3.89618	3.47584	3.61117	4.16627	4.20666
YMR163C	4.36142	4.32106	3.52896	3.4871	3.02284	3.27571	2.62978	3.1633	2.82534
YMR164C	4.96147	4.25194	3.37766	3.09741	2.78676	2.56765	2.25218	2.4471	2.56761
YMR165C	6.14825	5.57166	5.42289	5.19344	5.05931	4.86488	4.99998	4.70586	4.13753
YMR166C	3.12094	3.54348	3.79879	5.05857	7.37328	8.13508	11.695	11.7268	11.5066
YMR167W	3.33348	3.21602	3.10144	3.25052	3.2443	3.63415	3.7932	3.71393	3.35563
YMR168C	3.59141	3.58317	3.30103	3.44366	3.68139	3.81153	4.0958	4.45141	4.13206
YMR169C	21.6394	21.2935	15.8211	10.7078	4.41093	2.21889	1.37231	1.79888	1.89604
YMR171C	7.31613	7.63863	7.44156	7.08827	7.13259	6.988	7.24761	8.58591	8.26878
YMR172W	5.19508	5.18152	5.18732	5.22439	5.24369	5.46312	5.40984	4.92967	4.98366
YMR173W	63.793	78.8551	59.1587	41.4262	18.4927	6.87854	6.19411	6.08074	5.45186
YMR174C	159.15	171.075	120.095	72.0629	19.7848	4.92633	5.62972	3.79061	2.84786
YMR175W	906.583	903.247	451.497	207.816	35.7895	2.79639	3.09818	1.44453	1.03568
YMR175W-A	1.98082	1.82514	0.847229	0.448982	0.0620106	0.0102743	0.0117758	0.00976179	0.00461667
YMR176W	3.37297	3.21469	2.92086	2.90367	2.86808	2.52468	2.67496	2.81123	2.65047
YMR177W	3.07386	3.1445	3.24714	3.57015	3.98248	3.57634	3.70755	3.50888	3.90137
YMR178W	8.68181	9.54714	10.2511	10.3522	8.97059	9.67229	8.46824	9.31859	10.2909
YMR179W	2.34402	2.54293	2.77234	2.93724	3.5966	3.7548	3.2498	4.05358	4.00042
YMR180C	8.49332	7.49163	6.55976	5.21834	4.18103	3.85552	4.44779	3.96808	3.73687
YMR181C	28.9551	26.0287	22.525	16.9219	10.9446	7.4807	7.42811	6.2978	5.74031
YMR182C	5.73435	6.06227	6.4465	5.98448	6.30079	6.12017	6.67969	6.14537	6.05112
YMR183C	14.2418	15.5433	17.1422	17.7941	16.6915	16.6529	16.1346	16.0038	16.0381
YMR184W	9.87217	11.3635	12.9591	12.7327	9.9773	8.69466	8.81946	8.17488	7.56356
YMR185W	4.24267	4.19832	4.05022	3.79675	3.1654	3.26947	3.05412	2.97582	2.86479
YMR187C	3.65572	3.85611	4.43551	4.49184	4.2236	4.22117	4.3172	4.12505	3.70584
YMR188C	13.4676	12.1244	14.7071	18.1132	21.5319	28.6274	37.2062	43.8438	50.4258
YMR189W	4.63163	6.30158	10.712	13.3033	15.9337	15.1334	13.9549	14.8538	15.406
YMR190C	2.61268	2.31388	2.3425	2.35302	2.78625	2.66212	2.52162	3.39238	3.30582
YMR191W	46.1256	45.5157	36.824	29.8264	20.7243	15.4512	14.3746	7.56043	6.3958
YMR192W	4.22457	4.10787	3.76872	3.57124	3.52051	3.62146	3.67765	3.55747	3.52112
YMR193W	10.418	9.73655	10.244	12.1327	14.1817	15.6769	19.4002	19.7291	19.8276
YMR194W	45.8852	49.0987	52.8257	59.4037	62.926	72.4543	56.8998	79.1633	80.1671
YMR195W	3.10865	2.38464	4.6609	4.82685	3.85311	3.61819	4.37981	4.40354	5.58624
YMR196W	12.6946	14.09	14.5364	12.3912	8.47912	5.3685	4.86011	3.71337	2.93257
YMR197C	20.2774	21.4473	20.8689	18.3553	16.0871	14.9308	13.775	10.2255	9.22507
YMR198W	2.46875	2.76392	3.01444	3.60762	4.0389	4.22752	3.93805	4.25806	4.14996
YMR199W	5.89115	8.17213	8.01795	7.95391	9.26452	9.27659	7.86324	6.98662	6.86256
YMR200W	24.7338	27.1648	29.9931	26.7965	23.2425	18.2318	19.7555	19.1576	19.7494
YMR201C	8.69439	8.96836	10.3904	8.62949	6.48647	5.14265	4.98675	5.10702	5.3022
YMR202W	27.828	43.3288	75.5761	74.2968	56.5776	46.8902	39.5092	37.5667	41.5065
YMR203W	18.2322	19.75	20.4573	22.8465	28.1862	28.473	31.4672	29.4864	27.7001
YMR204C	4.49902	4.1999	3.3384	3.05945	3.23105	3.02641	3.38726	3.46226	2.86908
YMR205C	21.6325	22.9202	23.5152	20.8425	18.8986	17.6953	15.4158	16.2282	16.9249
YMR206W	32.8275	28.9634	15.1977	9.8238	8.53339	6.48913	6.78144	4.24144	2.80921
YMR207C	2.26822	1.99582	2.04647	2.33798	2.55722	2.49748	2.42351	3.16789	3.14059
YMR208W	10.5609	11.7964	14.046	14.0701	13.4139	11.8303	11.7363	10.6986	11.5441
YMR209C	4.23039	4.65862	5.02809	5.23774	5.27898	5.98277	6.16413	6.55753	6.68517
YMR210W	6.40103	6.35273	6.24316	6.8262	6.94706	7.42481	8.20924	9.16369	9.00007
YMR211W	4.37758	4.76117	4.23989	4.56308	4.81345	5.16813	4.79882	4.79739	4.49457
YMR212C	3.92444	4.00876	4.69251	5.59912	6.219	7.56927	7.64539	8.58603	8.58794
YMR213W	4.4993	4.15724	4.17344	4.17811	4.79888	4.69357	4.43285	4.84708	4.55412
YMR214W	6.02869	6.77076	8.52316	9.64819	10.9184	9.85191	10.7284	11.543	13.0299
YMR215W	5.32309	6.37701	9.40826	10.2724	11.7708	10.736	9.60571	10.4244	11.4541
YMR216C	4.94265	4.78662	4.77182	5.38995	5.81465	6.99595	7.73643	10.0733	9.27547
YMR217W	11.8113	14.9934	17.0573	21.2414	25.7093	29.4347	30.71	29.9161	34.026
YMR218C	2.37072	2.22672	2.5473	2.88156	3.11264	3.31815	3.24019	3.79685	3.75846
YMR219W	3.86404	3.36719	3.39518	3.22277	3.66201	3.26723	3.48032	3.92259	3.66747
YMR220W	9.56375	10.7324	12.7602	13.3264	13.3408	12.2616	12.7697	11.7121	11.6966
YMR221C	7.89846	8.5948	9.81991	10.2226	10.3957	9.86234	9.79549	9.64435	9.85718
YMR222C	6.98498	7.57346	6.91701	6.22999	6.86098	6.12249	6.42435	6.15898	5.95921
YMR223W	4.03702	4.12518	3.27639	3.17319	3.02753	3.64234	3.64568	3.85174	4.23892
YMR224C	4.99178	4.88171	4.49426	4.2661	4.10252	3.80767	3.69731	3.58005	3.38678
YMR225C	18.8451	18.7617	21.3811	24.6998	30.523	32.7544	42.4312	43.56	41.9017
YMR226C	28.2876	29.5377	26.5931	26.1586	25.8535	23.0197	23.261	23.8715	25.5221
YMR227C	5.78892	5.47262	5.24159	5.48649	5.6566	5.29828	4.71652	5.60642	5.74952
YMR228W	5.96953	5.34297	5.98715	5.9182	6.539	7.54869	8.93721	8.87136	8.82956
YMR229C	3.79071	4.25577	4.9202	6.16121	7.8192	8.40371	8.05971	9.88823	9.88671
YMR230W	70.9052	74.643	70.4741	77.3422	80.1699	100.614	89.1801	106.225	129.613
YMR231W	2.20009	2.44343	2.69118	2.90651	3.14078	3.03594	2.96929	3.39191	3.39155
YMR232W	5.25814	3.72194	1.56926	1.34162	1.34737	1.20288	1.60956	1.35607	1.09857
YMR233W	7.44651	6.83301	4.93296	5.54646	5.25975	6.10862	6.20599	5.47162	4.86961
YMR234W	6.18932	5.8966	4.91018	4.8483	4.81692	4.71219	4.9417	5.08055	4.99191
YMR235C	11.54	12.1362	13.3389	14.1164	15.232	16.0359	16.3453	14.7143	14.76
YMR236W	16.8904	18.5729	16.613	18.3456	18.0836	19.1193	19.3215	19.0585	19.5777
YMR237W	6.23763	6.2269	6.66299	7.24036	7.64061	7.93463	8.20466	8.59655	8.46818
YMR238W	15.4363	16.9643	21.0413	17.7008	11.8829	9.499	8.493	7.01881	6.78008
YMR239C	3.14135	3.05059	3.35279	3.98869	3.48951	4.24732	4.6791	4.57109	4.76847
YMR240C	5.07779	5.32985	5.18084	5.50719	5.80261	6.17589	6.43258	6.99022	6.35562
YMR241W	20.5388	24.2961	30.7984	37.2979	47.0244	52.385	51.3893	49.3393	49.9737
YMR242C	47.7712	53.5487	57.0433	63.9689	78.5887	87.6332	83.6627	98.5119	111.415
YMR243C	13.4265	14.831	15.4818	17.1072	16.2491	18.2214	17.6209	17.8666	19.152
YMR244W	4.19446	7.20199	5.35936	3.48619	1.13729	0.4168	0.44076	0.394144	0.307423
YMR244C-A	30.1643	29.1563	28.8819	28.0896	26.123	27.9477	31.4878	28.8091	28.6014
YMR246W	33.5592	34.8859	25.8784	23.3835	21.1388	19.6298	17.6203	13.1709	12.7294
YMR247C	3.2394	2.91347	2.56573	2.76831	2.79771	3.09868	3.02309	3.75557	3.86078
YMR250W	18.0527	19.9252	16.641	12.0457	4.25078	1.55228	1.43838	1.73436	1.38526
YMR251W	3.32943	3.57401	4.07849	2.93343	1.41591	0.853822	0.770065	0.835308	0.628109
YMR251W-A	66.7083	109.681	214.827	199.417	119.877	87.8494	87.8784	105.699	109.05
YMR252C	10.9798	11.1096	10.5451	9.35327	7.25931	5.98236	5.22121	6.5249	7.22477
YMR253C	6.90001	7.92645	7.13089	5.71822	4.48332	3.699	3.51675	3.86961	3.83053
YMR255W	20.3642	18.3912	16.3317	14.0289	13.2515	12.5953	12.671	11.5256	11.3296
YMR256C	108.179	101.911	103.928	112.316	117.726	146.319	137.919	148.463	161.481
YMR257C	3.29131	3.21005	3.59034	3.95919	4.97532	5.98563	6.64644	8.2198	7.54296
YMR258C	7.94333	7.86369	6.88805	6.33312	5.19989	5.21261	5.50851	5.08233	4.30009
YMR259C	2.62326	2.5952	2.45085	2.82164	3.29127	3.67041	4.16927	4.21181	4.16115
YMR260C	28.589	31.4796	36.9212	41.5419	48.6802	57.206	58.1893	61.4066	67.5525
YMR261C	4.2349	4.8358	5.92661	5.6461	5.40064	4.22401	4.09573	5.16247	5.21597
YMR262W	7.66851	7.40278	6.62723	6.10875	4.94358	3.85535	3.82629	4.26051	4.06524
YMR263W	6.56798	6.88558	7.45763	6.75252	7.17468	7.09792	6.88132	6.49445	7.18217
YMR264W	17.6113	17.6594	19.8003	19.6572	18.2967	18.5346	18.0277	16.8083	17.6079
YMR265C	5.09447	5.30684	5.29085	5.00903	5.08627	4.66013	4.73423	4.05335	3.97391
YMR266W	8.3149	9.64321	10.2717	10.241	10.0915	9.37581	9.15961	9.26378	9.26209
YMR267W	8.82216	9.43872	9.78713	11.4036	12.4901	14.3342	15.4799	15.8066	13.8163
YMR268C	4.57504	4.42617	3.64475	3.56162	3.34389	3.17936	3.43387	3.16347	3.15819
YMR269W	6.09913	5.54785	6.22844	6.95351	7.15868	7.97673	8.78421	7.67262	8.35376
YMR270C	4.65349	4.86655	5.04973	5.14682	5.79394	6.38231	6.29514	5.67181	5.31205
YMR271C	12.7632	12.7468	9.22478	6.82946	3.56689	2.91298	2.89294	2.50504	2.49852
YMR272C	17.4575	16.2521	16.7487	16.2427	16.6168	13.5125	14.4044	21.5153	25.9178
YMR273C	2.87004	2.7566	3.03269	3.35146	4.26482	4.01702	3.79084	4.51881	4.36325
YMR274C	2.51788	2.93861	3.23073	3.55435	4.35175	4.77908	4.11476	4.40085	4.2233
YMR275C	3.8041	3.88927	3.75652	3.96932	3.96828	4.21442	4.37511	4.80196	4.64811
YMR276W	27.4822	28.039	28.6789	25.2081	25.9469	22.4646	25.4144	20.9377	22.7783
YMR277W	5.43715	6.00594	6.08966	6.13002	7.45607	8.07057	8.88666	8.90451	8.88375
YMR278W	7.78213	7.35364	6.21726	5.32809	3.462	2.4287	2.39941	2.02843	1.79768
YMR279C	2.87131	2.71525	2.47877	2.04551	1.91434	1.50448	1.49544	1.55394	1.24901
YMR280C	4.19675	3.84538	3.9111	3.7562	5.09295	5.25953	4.5872	5.2216	4.18753
YMR281W	6.27991	7.17824	7.57421	7.19606	6.34398	5.68008	5.45811	5.77524	6.14815
YMR282C	4.80879	5.10894	5.95451	6.46024	8.01763	9.7053	10.4086	11.5649	10.4368
YMR283C	3.98363	3.82377	3.67183	3.59836	3.6835	3.7147	4.10622	4.10301	4.05262
YMR284W	5.91671	5.38467	4.44712	3.64268	2.53423	2.44309	2.44553	2.36533	2.57734
YMR285C	3.89258	3.89842	4.72583	5.23271	5.71875	6.16138	5.80978	7.48702	7.48942
YMR286W	22.7945	20.779	22.0226	24.4968	27.5239	32.9706	39.1842	41.5961	42.3321
YMR287C	2.52923	2.6814	3.3173	3.70806	4.47373	4.87246	5.46931	6.5368	6.80592
YMR288W	2.78152	2.84501	2.93365	2.95918	3.19486	3.39858	3.4548	3.66206	3.76035
YMR289W	10.5072	10.1816	9.2495	9.19294	8.34	8.59283	9.02617	8.39719	8.27574
YMR290C	6.74639	8.1525	9.58571	11.0997	14.1121	15.704	16.6398	15.9172	17.8185
YMR291W	6.29527	5.57976	4.39969	3.9827	3.61618	3.97213	3.90658	3.40936	3.44209
YMR292W	14.1233	14.6843	14.6032	14.1495	13.0607	14.3586	12.8187	13.078	11.9027
YMR293C	4.74504	4.90758	4.96996	5.36774	5.64984	6.2568	7.49915	8.2219	7.07273
YMR294W	6.70157	6.97977	5.99321	6.06826	5.9155	6.02371	7.17601	6.09637	5.88305
YMR295C	46.6397	47.3797	47.9209	38.3796	28.903	21.4799	19.1356	19.0581	20.2765
YMR296C	7.41607	8.7039	11.8865	13.0951	14.3431	14.4011	15.4325	15.8699	16.337
YMR297W	51.1497	59.1099	62.6174	53.7701	37.0755	24.728	22.3132	19.417	17.8024
YMR298W	24.6823	23.0293	18.4161	17.2742	13.53	11.8559	10.7096	11.9017	12.7627
YMR299C	7.55071	7.54761	7.78624	7.41339	6.47901	6.71505	7.36605	8.50464	8.585
YMR300C	9.38792	11.7014	14.707	17.9329	21.8013	22.0644	23.1014	25.8086	27.1557
YMR301C	5.51794	6.27101	6.39348	6.58508	7.65793	7.92812	8.42367	7.55971	7.76054
YMR302C	12.9814	12.8635	12.9941	12.4429	12.7515	12.387	13.4147	12.5488	11.3222
YMR304W	7.80232	8.08353	6.91556	6.36641	5.26307	3.86193	3.77384	3.27891	3.25835
YMR305C	17.2937	22.184	30.1643	34.6245	41.4441	36.6574	34.9512	33.7392	37.2151
YMR306W	2.32498	2.07173	1.5856	1.19353	1.00223	1.01987	1.08926	1.07232	0.886732
YMR307W	19.9597	30.7119	53.1483	65.8404	85.909	88.0589	79.7265	84.5209	88.5033
YMR308C	6.36805	6.54754	7.00936	8.3034	9.74866	10.6823	10.4834	12.7707	13.7107
YMR309C	9.09221	10.3801	11.5699	13.1496	15.7544	16.5788	15.9796	18.2641	18.0131
YMR310C	7.05031	7.0229	7.12627	7.94791	9.52534	9.96303	10.7908	9.71533	11.0019
YMR311C	32.2028	31.114	29.4567	25.2404	20.69	16.4565	18.0054	16.0966	16.7089
YMR312W	9.42475	9.49384	8.4268	8.75406	8.77641	9.15772	10.9101	9.03864	9.93428
YMR313C	5.29172	5.00666	5.51951	5.71429	4.87651	4.46101	4.453	5.21758	4.83532
YMR314W	27.2069	29.1427	30.7745	28.9168	25.6578	22.6216	23.6639	23.0402	25.1529
YMR315W	23.4044	28.3581	25.9481	23.0026	18.7206	15.5976	17.069	12.948	12.3036
YMR316W	4.04659	3.5317	4.82624	4.82495	3.53677	3.11266	3.52832	3.5332	3.50537
YMR318C	9.44794	12.2695	18.9779	25.9675	34.35	35.0198	35.9822	29.2942	32.5274
YMR319C	5.29179	4.63264	4.09152	4.14987	4.3102	4.17527	4.67381	6.11177	6.45961
YMR321C	6.5677	5.90907	5.11401	6.0402	7.21926	7.99367	9.45237	9.23553	9.72773
YPL281C	31.0536	26.6248	9.04148	5.32797	2.29073	1.48028	1.73362	1.20271	0.803357
YMR325W	3.45469	5.97534	30.4995	24.5353	5.6257	0.253745	0.145423	0.141567	0.131134
YML132W	9.26215	8.2436	7.3039	4.34994	1.30595	0.518973	0.734442	0.537751	0.401827
YHL046C	14.4575	17.8481	14.3715	8.1325	2.17123	1.20237	1.10322	1.25375	1.45792
YNL331C	5.19714	4.84806	5.01688	4.52861	4.77535	4.72753	5.16972	4.96781	4.57846
YNL330C	8.65086	9.39773	10.1965	10.6288	11.7182	12.1765	12.2601	12.4576	12.3358
YNL329C	3.57949	3.88802	4.32018	4.60594	5.63504	5.60616	5.70246	5.69023	5.53567
YNL328C	2.62945	2.02663	1.81915	2.03463	2.38851	2.215	3.40949	3.76435	2.63017
YNL327W	3.86452	4.97811	11.743	13.6154	16.2693	19.2968	20.0905	24.4775	26.3686
YNL326C	7.4577	7.38664	7.52325	7.65473	7.14668	7.00275	6.36848	6.48602	5.86056
YNL325C	4.12874	3.79107	3.28044	3.24502	2.77735	2.58562	2.37601	2.56012	2.25128
YNL323W	10.4835	10.5683	10.0398	9.45258	8.94123	7.64402	7.79387	8.36572	8.66818
YNL322C	27.0334	27.9311	27.2435	25.1034	22.2132	19.5751	20.8022	18.2177	19.1704
YNL321W	5.82333	6.32157	6.9875	6.94853	7.67486	6.88599	6.22996	6.35373	6.09389
YNL320W	6.40885	7.6251	9.24044	9.81011	8.6472	8.02299	6.40429	6.27433	5.56412
YNL318C	2.54162	1.31144	0.445845	0.246623	0.220929	0.267383	0.320105	0.231326	0.15859
YNL317W	5.50134	5.45038	4.81458	4.64981	4.24018	4.54478	5.13951	4.85736	4.38702
YNL316C	4.77328	5.34512	5.70477	6.01885	6.21748	6.60735	6.51021	6.28065	6.20612
YNL315C	13.4053	12.5872	14.098	15.4758	18.1277	21.1939	26.5598	26.624	28.1682
YNL314W	8.85795	8.73917	6.83348	6.50631	5.34246	4.86305	4.77586	4.45551	4.46323
YNL313C	4.44385	4.69691	5.14832	5.86819	6.4689	7.21827	6.88582	7.65807	7.27596
YNL312W	13.8193	15.3423	17.0556	15.1061	13.782	12.603	10.5251	10.5079	11.3261
YNL311C	3.10488	3.49068	4.14057	4.64387	4.32192	3.89224	4.05587	4.55986	4.81754
YNL310C	9.59942	9.27575	9.00664	8.80286	8.89799	9.32066	10.2283	9.55205	10.635
YNL309W	5.05163	4.82857	4.04121	3.76885	4.22079	4.05602	4.58514	4.02473	4.17212
YNL308C	8.3158	8.06794	9.38195	11.2967	12.9873	14.5656	16.2472	15.6551	16.0997
YNL307C	14.2507	16.042	17.7725	18.4133	20.0374	19.9079	21.0349	18.8968	18.53
YNL306W	17.7707	18.5619	21.1288	25.1648	29.6567	34.6714	45.368	44.4551	42.2494
YNL305C	26.3096	25.4889	24.1377	19.7677	13.2545	9.6483	9.16267	8.39817	8.21954
YNL304W	3.41733	3.4292	3.8717	3.54593	3.66639	3.37377	3.35619	3.20052	3.27911
YNL302C	55.2149	63.6775	70.6398	83.1913	87.1211	105.688	85.1772	112.303	120.532
YNL301C	19.1037	22.5653	26.4532	31.3673	34.1823	41.4124	34.8918	43.1668	43.0347
YNL300W	13.387	18.6273	22.4659	21.6942	28.9016	28.3829	29.0019	27.4174	29.4134
YNL299W	3.59025	3.47406	3.90003	4.28058	4.70352	4.79039	4.70856	5.43196	5.73092
YNL298W	4.41697	4.42186	4.27747	4.49782	6.21757	6.54208	6.31	7.6903	7.6729
YNL297C	2.79047	2.71429	2.77794	3.10377	3.07093	3.05196	3.07596	3.59664	3.58918
YNL295W	4.76893	4.47394	4.96552	5.0961	5.69946	6.57023	7.63739	7.47882	6.67212
YNL294C	7.8215	8.76363	10.4929	9.07722	6.41107	5.83024	6.24138	6.00818	6.12172
YNL293W	6.24324	7.04586	7.65828	6.684	4.5362	3.81099	3.55051	3.61126	3.37881
YNL292W	5.59925	5.57812	5.59356	6.25544	7.8269	8.02018	8.94399	8.31983	8.53805
YNL291C	4.01053	4.03426	4.66538	4.47654	4.95906	4.81208	5.27547	5.48557	5.82925
YNL290W	8.8274	9.3007	9.6629	10.5472	11.9995	12.4772	12.409	12.7867	13.1721
YNL289W	7.21426	10.9746	13.2517	13.2183	16.6909	14.0737	12.164	13.4956	14.0856
YNL288W	9.18581	9.14823	9.01251	8.38665	8.0305	7.46416	8.87885	8.78345	9.47058
YNL287W	9.5866	10.4385	11.4399	11.6203	11.2749	11.1526	10.6788	11.6419	11.5048
YNL286W	10.1423	9.16574	7.74743	6.81676	5.81675	6.06568	5.73764	5.27204	5.78384
YNL284C	12.9487	14.5563	17.3124	21.1192	24.9996	28.5858	34.0713	33.5168	33.8309
YNL283C	8.2949	8.18846	8.75825	9.84359	11.8161	13.4447	13.6272	12.1083	12.0281
YNL282W	2.84047	3.11176	3.32334	3.40959	3.54443	4.20549	4.25366	5.00218	4.57297
YNL281W	48.1462	45.0278	33.3251	30.5763	26.5461	27.6831	28.5336	28.7259	28.4088
YNL280C	11.8098	17.5627	25.7832	23.0515	14.2763	9.20025	7.03017	7.25798	7.02934
YNL279W	3.34915	2.68124	2.31193	2.05185	2.30561	2.26184	2.63765	2.54869	2.00318
YNL278W	2.12268	2.0505	2.63758	3.00144	4.2344	4.50926	4.51349	4.98062	4.55011
YNL277W	16.8407	17.0007	14.532	15.3141	15.7125	18.703	19.9278	20.8767	20.0961
YNL275W	3.95694	4.67188	5.34338	5.4116	5.34453	4.90963	4.75802	4.42371	4.51465
YNL274C	32.6969	32.0212	20.9155	16.3285	11.8998	9.40002	8.10203	5.72139	5.24079
YNL273W	2.36582	2.34954	2.40523	2.63125	3.17974	3.16826	2.72091	3.42665	3.59493
YNL272C	5.15288	5.19603	5.3406	5.52822	5.53937	5.91009	6.07791	6.43189	6.09333
YNL271C	2.81228	2.78289	3.13495	3.15569	3.52049	2.88166	2.83404	3.91404	3.95979
YNL270C	3.31024	2.72204	1.77513	1.23333	1.03657	0.928689	0.931626	0.436122	0.307498
YNL268W	11.0238	12.5218	16.4003	18.5766	20.003	19.5983	19.592	20.8945	22.4712
YNL267W	6.06172	5.76788	5.74361	5.74696	6.28603	6.53531	6.32393	7.14621	7.09617
YNL265C	14.384	14.6095	13.1531	12.7524	11.4131	10.0559	9.33697	8.11001	7.80375
YNL264C	7.80927	7.51812	6.46904	5.87456	4.97611	4.83345	4.71102	4.65947	4.95296
YNL263C	13.3341	13.0574	14.093	13.415	14.1033	13.1534	13.2289	13.278	14.1885
YNL262W	2.14546	1.94939	1.94216	2.0943	2.49648	2.34065	2.47129	2.82859	2.7676
YNL261W	6.42156	6.43262	5.79792	5.66613	4.68839	4.72972	4.96321	4.75265	4.71123
YNL260C	6.80903	7.97406	6.97682	6.56002	5.23274	4.94883	5.86484	5.09303	5.80921
YNL259C	39.3693	36.5828	41.4531	43.9718	33.0184	43.2274	42.6335	51.8404	63.0322
YNL258C	6.04554	6.11198	5.72366	5.79527	5.59929	6.18063	6.23786	6.72878	6.31506
YNL257C	3.38689	3.32549	3.21786	3.48922	3.58492	3.88352	3.91661	4.32126	4.30296
YNL256W	4.7406	4.79107	5.07932	5.45892	5.95716	6.75637	7.5594	8.36502	9.42927
YNL255C	37.9316	41.9002	42.4722	43.7159	47.6117	48.8363	49.9255	46.0434	50.0498
YNL254C	4.16514	4.51866	4.56493	4.22082	4.04589	4.54241	4.89058	4.69138	5.12111
YNL253W	6.28518	6.99512	6.53702	5.93117	5.97278	5.38519	5.12142	5.06095	5.37644
YNL252C	11.89	10.6378	12.713	14.846	18.6414	20.5947	25.9717	28.0576	29.8319
YNL251C	12.8217	12.5509	11.5895	9.29257	9.31264	8.08536	9.73011	8.16789	8.62083
YNL250W	3.38333	3.05674	2.59741	2.44056	2.15425	2.08854	2.11175	2.14445	2.0212
YNL249C	4.43026	4.36943	3.23998	3.24461	2.76732	2.77577	2.7208	3.08425	2.88947
YNL248C	7.73517	8.44065	9.72361	11.5024	13.5512	14.9458	15.4502	14.7588	16.705
YNL247W	5.96743	7.19602	8.70556	10.2938	13.1014	14.4221	15.0997	15.8429	17.1473
YNL245C	8.86615	8.80583	8.52444	8.09875	7.85941	7.23315	6.93452	7.44318	7.1996
YNL244C	54.5035	54.5195	56.7102	55.6091	50.9226	53.1864	59.5742	57.894	62.4737
YNL243W	7.76466	8.60865	10.301	10.3312	11.7901	11.5359	12.0604	12.8233	12.5471
YNL242W	2.49047	2.36681	2.32696	2.53889	2.79361	2.66107	2.65563	2.97149	2.62349
YNL241C	32.578	33.979	35.6562	32.5137	29.6043	27.2818	26.4081	27.9052	30.5694
YNL240C	10.1262	9.00742	8.77508	8.81191	8.81196	8.07377	8.54423	7.59747	7.53476
YNL239W	15.2628	18.9841	23.3373	24.8067	24.8675	23.0207	22.0406	14.8089	13.8836
YNL238W	4.13428	4.77836	5.77173	6.35236	7.11135	7.07967	6.90011	8.28599	8.63924
YNL237W	7.83613	8.32179	8.25443	6.7231	5.68669	5.03467	4.80276	4.10178	3.68232
YNL236W	2.81533	2.74704	2.99272	3.51367	3.68702	4.05196	4.27821	4.46929	4.9328
YNL234W	2.16114	2.26282	2.3728	2.04713	1.64393	1.38134	1.51443	1.6579	1.70762
YNL233W	3.57563	3.64394	3.96194	4.52059	5.44868	5.52467	5.04561	5.26377	5.27719
YNL232W	8.51698	9.23679	9.86251	10.1421	10.4712	10.1022	10.7921	10.2056	11.7451
YNL231C	7.37382	7.25542	9.24073	10.5174	13.3495	14.4611	14.1032	17.2222	18.0564
YNL230C	4.14032	3.91637	3.47452	3.25683	3.31932	3.33704	3.54319	3.65713	3.56046
YNL229C	11.4412	11.2108	12.4903	12.4956	12.5182	12.7578	14.1583	13.0908	12.4936
YNL227C	5.95322	6.07313	5.51293	5.56871	5.62432	5.61906	5.77782	5.52804	5.91142
YNL225C	4.44296	4.71703	5.02068	5.19304	5.35049	5.43956	5.12713	5.2357	4.87934
YNL224C	3.80172	3.81922	3.86316	3.7492	3.36479	3.68945	3.27063	3.70751	3.46021
YNL223W	6.4683	6.44199	5.52716	4.80861	3.59379	2.82617	2.61734	2.4039	2.21256
YNL222W	6.43512	6.63123	6.48389	6.93744	7.74821	8.52318	8.41665	8.09759	9.06448
YNL221C	4.51452	5.20067	6.13336	6.61566	7.22942	7.29649	6.85378	8.11924	8.54829
YNL220W	11.5958	15.1221	19.5775	24.2424	29.874	32.7949	33.2315	36.7602	35.4131
YNL219C	10.8632	10.9622	11.4271	10.5936	9.87165	8.64386	9.09245	9.40925	9.90264
YNL218W	4.05672	3.80845	3.59909	3.21668	3.00658	2.69214	2.91971	3.07149	3.03141
YNL217W	4.35917	5.52234	7.07038	7.28553	7.85491	8.34383	10.8016	13.0536	13.8589
YNL216W	5.75639	6.45008	7.23605	7.8126	8.9332	9.04191	8.04583	9.2234	9.73437
YNL215W	14.8319	14.6176	13.6154	12.6794	12.1314	11.2823	10.583	10.1079	9.80042
YNL214W	7.36805	6.5103	6.02876	6.25888	5.21812	4.91715	5.61793	5.06808	4.66555
YNL213C	7.42201	7.20203	7.7616	9.26335	10.2982	12.3657	14.8982	15.0211	14.458
YNL212W	6.59982	7.33106	8.27061	8.20397	7.99601	7.94958	7.26553	7.72207	7.3922
YNL211C	8.94696	7.05366	6.27652	6.41982	5.63902	6.79941	5.94453	6.11573	7.6692
YNL210W	1.50256	1.54773	1.3915	1.70251	1.6594	1.89195	2.47137	2.49766	1.91662
YNL209W	61.0746	67.6421	64.2579	75.2815	90.1409	99.6086	86.7591	94.6561	95.1975
YNL208W	99.3602	101.931	95.0336	74.9512	45.2658	30.9392	27.0059	19.5957	20.0011
YNL207W	6.70918	6.61742	6.47906	7.00682	7.28117	8.04101	8.35097	7.57686	7.6544
YNL206C	9.61671	8.94366	8.16172	7.66457	7.70676	7.44156	7.71155	7.70913	7.76663
YNL204C	2.07347	1.89676	2.22004	1.92767	1.98507	1.78844	1.68214	2.41078	2.12535
YNL202W	33.2843	31.2085	21.2989	17.7266	16.3732	14.8244	13.4573	3.49122	2.11987
YNL201C	3.36721	3.08915	3.22482	3.89721	4.17891	4.52167	4.50492	4.43891	4.41087
YNL200C	25.878	28.0557	25.4626	18.9532	9.37188	5.54631	5.23331	3.22525	2.81058
YNL199C	9.2799	9.16226	8.04599	7.90838	7.62643	8.05662	8.5554	7.87343	7.56741
YNL197C	4.34642	5.34201	7.11326	7.60634	9.6867	10.4638	10.1369	10.7659	11.3239
YNL196C	4.87599	3.46377	2.10733	2.19069	1.89082	2.82641	2.91619	3.35593	2.60955
YNL195C	48.3858	48.5585	32.0879	18.4989	5.40361	1.34689	1.38856	0.956688	0.997897
YNL194C	18.9349	21.8321	20.1719	12.5449	4.27723	1.36073	1.59373	1.1128	0.927682
YNL193W	4.72354	4.6076	3.6555	3.55404	3.73235	3.70507	4.06815	3.94581	3.78691
YNL192W	8.77798	8.72869	11.8178	10.818	8.16346	6.96286	7.21148	7.96424	8.63693
YNL191W	7.14081	7.77321	6.43554	6.97233	7.90664	7.96879	7.46331	6.13099	6.63195
YNL190W	36.88	40.9125	46.1196	41.899	38.023	35.2255	47.4123	47.4701	53.644
YNL189W	13.6864	14.8136	16.4713	17.3064	17.4215	17.3761	17.3309	15.1429	15.5282
YNL188W	3.96622	4.07546	3.95763	4.59095	5.15843	6.31348	7.16891	6.46869	5.86833
YNL187W	3.71557	3.10491	2.87239	3.01577	3.31626	3.10833	3.29087	3.44653	3.53712
YNL186W	7.39764	8.35851	9.02778	9.89316	10.6577	10.7005	10.295	10.6097	10.7256
YNL185C	12.0957	10.9059	13.9117	16.946	22.3217	24.5028	31.683	36.1735	35.9521
YNL183C	5.48105	6.26945	7.93676	8.12437	8.83673	8.8785	8.64105	9.16236	9.50965
YNL182C	3.59826	4.14576	4.8035	6.03566	7.32952	7.99834	8.10229	7.42593	8.13325
YNL181W	9.53009	9.0016	7.2591	7.69619	8.43295	8.55044	8.38367	7.51263	7.62451
YNL180C	34.5463	32.1113	23.7364	17.4513	11.9467	10.1767	11.7057	11.6944	13.1664
YNL178W	72.7857	84.1437	90.7423	104.969	115.203	131.514	103.837	134.579	141.967
YNL177C	14.0966	13.4485	14.6103	17.1089	20.1966	22.5541	29.6185	26.8286	26.4072
YNL176C	7.50527	7.9105	8.58847	7.98944	8.56144	8.7555	9.21364	9.10321	9.09457
YNL175C	6.84077	7.42043	7.9308	10.01	11.6785	13.2588	13.0605	12.9382	13.9751
YNL173C	25.8043	26.3891	28.036	25.4722	23.0851	21.7974	24.3119	20.9366	20.1313
YNL172W	2.31097	2.12454	2.17722	2.22938	2.2929	1.99403	1.83264	2.28835	2.36006
YNL169C	5.87438	6.80915	9.62157	11.094	14.7931	17.9051	21.0606	22.1553	21.7921
YNL168C	9.51765	10.4091	10.0485	10.0536	9.95806	9.52874	9.64378	7.65006	7.71011
YNL167C	5.10721	5.59847	5.86347	6.21487	6.82383	7.59628	7.96333	7.90692	7.4421
YNL166C	7.77245	8.1358	8.68081	8.93983	9.47471	9.54395	9.65989	9.3261	9.73616
YNL165W	8.30764	7.7158	6.02922	5.25264	4.48617	3.97311	3.88198	3.22181	3.29475
YNL164C	8.59086	7.87736	6.50769	6.12799	4.97694	5.29801	5.57659	4.65045	4.83822
YNL163C	4.07188	4.24727	4.31779	4.86455	5.10163	4.98322	4.90448	5.74538	5.83781
YNL162W-A	5.58525	5.44601	4.6704	5.6469	4.96395	5.32493	5.84199	5.67774	7.14557
YNL161W	7.04863	6.75099	7.05875	6.96595	7.04926	6.79741	6.9188	6.91031	7.19666
YNL160W	24.9841	55.4221	94.8044	73.8391	24.6943	2.90806	3.33667	2.80879	2.3109
YNL159C	10.0071	9.59761	9.59497	7.97077	6.49045	5.36622	5.47579	4.93086	5.01044
YNL158W	8.18815	8.81159	9.38704	9.15307	9.264	9.0436	10.1945	10.3933	9.9253
YNL157W	26.774	28.5454	30.3627	26.6794	21.1526	16.4593	17.9471	16.6582	16.7233
YNL156C	16.2354	17.7779	20.8733	19.7901	16.0031	13.8846	13.4114	13.6444	13.9259
YNL155W	15.5888	17.0088	19.3651	18.2762	13.0359	11.382	12.5128	12.8785	13.275
YNL153C	7.99861	9.23237	11.9553	13.632	13.7621	16.0544	17.389	17.0828	19.4126
YNL152W	4.75231	5.11236	5.04929	5.04821	5.70932	6.24326	6.37112	5.70975	5.44327
YNL151C	10.1229	9.23634	9.52677	9.80949	12.1693	12.6721	13.1391	12.9869	14.551
YNL149C	36.1465	36.2432	41.1477	38.0205	30.3947	28.283	26.7019	28.5281	37.3851
YNL148C	5.85875	5.44286	5.86603	5.23645	4.80707	3.87438	4.40187	3.97561	4.09286
YNL147W	19.5237	19.8479	20.7434	20.784	17.5369	17.7723	15.2537	16.6482	16.2169
YNL146W	7.08212	6.70099	5.17948	5.6361	5.39091	4.84041	4.91504	4.28284	4.18052
YNL145W	54.3915	45.6988	37.9113	47.8848	62.0123	60.4597	72.9186	106.45	117.388
YNL144C	7.96383	7.76285	4.8477	3.52656	3.54802	3.56427	3.16755	4.5473	4.59324
YNL142W	15.5339	21.8677	25.788	27.114	40.7012	38.1806	21.9788	17.4778	18.5192
YNL141W	7.55575	10.4512	11.4544	13.147	14.97	15.4398	15.4997	17.4579	20.2956
YNL139C	2.29638	2.34323	2.33089	2.57836	2.81403	2.81248	2.99381	3.22622	3.19585
YNL138W	11.2321	13.3817	14.5474	14.469	14.3952	13.7079	13.6446	12.2263	11.3616
YNL137C	8.51002	8.99596	11.3943	13.6489	17.9493	18.9433	25.5305	26.2462	27.3145
YNL136W	9.92961	8.63849	9.1166	8.62215	8.56483	8.60422	8.82693	8.79713	8.42364
YNL135C	83.2029	84.8758	79.5303	83.5799	82.0082	88.0155	78.6445	62.3768	58.678
YNL134C	21.8438	29.4327	31.3158	24.1942	10.4149	4.65206	5.97259	19.7741	24.9602
YNL133C	11.5003	9.4994	8.012	7.44005	6.06241	4.60061	4.46716	4.87963	4.94717
YNL132W	3.0602	3.43309	4.11893	4.94142	6.14673	6.3896	6.07911	6.75651	7.31255
YNL131W	26.5704	26.3158	30.3408	33.5278	41.576	47.4128	57.1205	53.9543	54.4076
YNL130C	14.7804	16.7454	17.6547	18.1105	17.7451	18.3949	18.4731	19.671	21.4726
YNL129W	4.44301	5.47591	6.53324	6.70403	5.87878	5.32433	5.22267	5.20338	5.66527
YNL128W	3.09747	2.79898	1.85756	1.84442	1.8364	1.43256	1.44268	1.28806	1.39942
YNL127W	3.69886	3.47164	3.02266	2.75304	2.69717	2.87201	2.94458	2.93825	2.81708
YNL126W	3.79627	3.51439	3.04345	3.18464	3.33513	3.68939	3.15031	3.86516	3.62043
YNL125C	13.4686	11.5612	10.202	9.61269	9.9858	9.26703	8.29368	4.90269	4.28605
YNL124W	4.86173	4.94589	5.1249	5.96265	6.63868	7.28709	8.25898	7.25261	8.55406
YNL123W	6.05784	6.54296	6.77798	7.28437	7.91045	7.55113	7.51989	8.33039	9.10719
YNL122C	14.3859	13.4367	15.6346	17.9084	21.0811	24.6343	29.9842	31.8594	35.3957
YNL121C	11.3755	13.0521	16.8943	19.3183	24.2652	26.1099	33.5727	34.1012	33.3482
YNL119W	6.49894	6.51962	6.17209	6.7486	7.18359	8.02241	8.86045	7.69027	7.92356
YNL118C	6.34315	6.91125	7.97009	7.91968	8.40145	8.82725	8.47059	9.68269	9.12084
YNL117W	11.136	10.0355	13.1486	14.5495	18.4964	18.635	25.6692	9.75268	3.61115
YNL116W	9.47004	9.19971	7.89866	7.37913	5.79799	5.12748	4.92249	4.0236	3.66849
YNL115C	17.5134	19.0106	19.572	14.7586	8.05441	4.71281	4.28479	3.71716	3.43907
YNL113W	11.9425	14.372	16.607	18.4433	20.3085	20.9414	20.7891	18.8587	19.5705
YNL112W	7.10807	9.56476	11.4131	13.5763	14.8546	14.9787	12.1318	12.9589	14.1058
YNL111C	21.904	33.0594	52.7966	54.9362	41.238	33.5029	30.1095	29.0636	32.4183
YNL110C	14.0916	15.4581	16.8439	17.7264	17.8968	18.1002	16.5789	14.5909	16.169
YNL108C	5.93391	5.7661	5.66776	5.84501	5.52781	5.16294	5.58225	6.29644	7.60099
YNL107W	7.08807	7.33732	6.8863	6.33621	5.40202	4.55224	4.62264	4.33	5.06694
YNL106C	1.72852	1.75642	1.87351	2.07258	2.48061	2.46247	2.36666	2.45011	2.64018
YNL104C	32.5362	45.5882	64.868	62.2983	57.5686	45.5325	42.6136	30.5109	27.5317
YNL102W	2.13776	2.07581	2.37631	2.87747	3.94443	4.15101	4.12839	4.64317	4.42888
YNL101W	7.67277	7.50744	8.18806	8.37739	9.29727	8.98094	8.76967	9.76399	9.63253
YNL100W	23.0682	24.2092	28.2194	30.4462	35.7744	39.0457	43.9292	37.1867	36.0646
YNL099C	10.0772	10.3763	9.87241	9.55627	9.74668	9.32826	10.1179	9.93146	10.1164
YNL098C	12.5238	14.8823	19.5189	18.415	17.5866	17.1968	17.1792	16.5537	16.6103
YNL097C	8.7201	7.88773	7.35799	6.29119	5.94392	5.46877	6.16293	5.82303	6.03123
YNL096C	26.4228	29.4352	32.6974	37.8945	43.4584	52.0352	48.8894	56.0488	59.0858
YNL095C	3.73698	3.23755	3.4752	3.68154	3.1166	2.98338	2.97578	3.08767	3.1554
YNL094W	6.63118	7.51759	8.89712	8.51158	7.31469	6.90008	7.12143	7.22503	7.25189
YNL093W	7.97745	7.85958	8.58055	6.56667	2.61143	1.13004	1.29936	0.77936	0.47335
YNL092W	4.92488	4.46132	3.67644	3.03761	1.92909	1.36823	1.52627	1.20346	0.989966
YNL091W	8.17701	8.12988	7.73891	7.77381	8.66701	8.04962	7.90989	7.89308	7.8463
YNL090W	9.44388	9.65684	10.5222	11.1469	11.6506	12.897	13.0393	12.3018	12.6907
YNL088W	4.42226	4.3178	4.29988	4.53533	4.94515	5.04621	5.09274	5.16997	4.8207
YNL087W	4.81202	5.54397	6.85109	7.87327	9.4418	10.4547	10.4271	10.0982	10.5907
YNL086W	7.16637	6.73379	6.81663	7.77367	7.56916	7.43119	7.60208	6.88333	6.27461
YNL085W	6.07379	6.25934	6.74869	7.0915	7.74948	8.12466	9.05288	9.52264	9.95588
YNL084C	12.1016	11.7934	11.8464	12.0584	11.4111	11.9277	13.5486	12.5867	13.5641
YNL083W	4.98669	5.81272	6.25074	6.8439	8.15075	8.68174	8.39125	9.05177	8.54414
YNL082W	3.86295	3.55156	3.45149	3.51766	3.5516	3.44555	2.98564	3.78036	3.4651
YNL081C	17.2238	16.4103	18.0689	20.6195	24.5138	28.2257	35.1791	37.4557	36.945
YNL080C	7.67226	8.75445	9.81984	9.49465	10.4327	10.4125	10.2177	9.94338	10.5805
YNL079C	46.7099	47.4958	51.2428	50.8321	49.7932	48.2956	48.4803	43.0437	50.343
YNL078W	7.63047	5.72151	5.47576	5.76724	7.09857	7.42344	9.06359	9.62786	10.5863
YNL077W	14.4069	15.3737	13.0997	10.9069	9.4811	6.65416	5.0369	6.12176	6.91375
YNL076W	6.40031	6.32162	6.18702	6.09254	5.94863	6.1488	6.72427	6.3503	6.19864
YNL075W	8.7347	9.96699	11.369	12.0509	12.6182	13.0492	12.2231	11.3333	12.9486
YNL074C	10.8226	11.0684	10.7854	10.4179	11.0669	10.4175	11.3661	9.89544	10.2718
YNL073W	6.03419	5.95513	7.44111	8.91909	11.2856	12.4619	16.7425	18.9845	19.1113
YNL072W	6.22817	6.20913	5.70767	5.68189	6.72148	6.4083	7.1565	5.97911	6.00227
YNL071W	32.8788	37.4864	36.8983	34.0516	30.1895	26.092	25.6147	22.4381	20.8205
YNL070W	33.1243	32.2006	33.2783	37.3182	42.6988	48.8833	64.6959	66.5894	62.7313
YNL069C	55.0874	64.7265	70.8522	82.955	94.78	111.875	101.836	124.588	138.163
YNL068C	6.96527	6.19921	5.71518	6.05967	5.58346	6.76968	6.32139	7.60634	7.49201
YNL067W	44.0556	52.2931	48.0339	55.604	58.298	71.9	54.7102	68.5582	59.3379
YNL066W	5.18373	5.7218	10.066	11.4219	14.3717	15.417	16.035	18.4128	21.3616
YNL065W	2.74998	3.19783	2.64179	2.60256	1.72437	1.37475	1.32133	1.37405	1.73808
YNL064C	55.5121	56.7285	47.9298	42.3048	34.9833	32.8797	32.96	30.2783	31.3503
YNL063W	6.98318	6.37166	5.23464	5.02345	5.12058	5.06262	4.7058	5.48109	4.82856
YNL062C	4.34823	4.37519	4.57442	5.3114	6.11586	7.0324	6.76245	6.5614	6.58339
YNL061W	8.17874	9.10187	10.645	12.1069	15.1322	16.3221	15.8417	14.7731	14.2951
YNL059C	5.4164	5.91263	6.51378	7.09471	7.50545	8.06322	8.35456	8.83566	8.59727
YNL058C	8.74821	9.04698	8.35619	8.51578	9.44044	10.1059	12.445	12.3484	12.374
YNL056W	10.8124	10.7482	8.85441	8.85591	8.31716	9.79586	8.85675	8.55856	7.95969
YNL055C	80.0772	93.6733	97.4298	102.521	111.315	113.891	117.226	123.873	117.353
YNL054W	3.42366	3.52465	3.97243	3.91414	4.28868	4.17855	3.96108	4.83604	4.71014
YNL053W	4.95356	4.91388	4.75691	4.8464	6.03015	6.53956	6.73328	7.66962	7.07403
YNL052W	54.6046	57.2936	65.7207	72.2582	86.6796	97.2248	114.325	107.583	109.092
YNL051W	6.90527	6.98053	5.6157	5.7625	5.3059	5.67758	5.72788	5.29433	4.93038
YNL050C	10.7605	10.4263	10.1887	9.71187	9.39584	8.5212	8.83759	8.73482	9.08877
YNL049C	2.28781	2.70014	3.88536	3.97601	4.46484	4.23707	4.57751	5.0576	5.4863
YNL048W	7.82823	8.31895	8.49548	8.5767	8.62852	8.77755	8.80046	9.007	8.96595
YNL047C	4.24901	4.52182	4.61796	4.79281	4.87043	5.24005	5.06784	5.33863	5.19175
YNL046W	7.72244	8.20556	7.52965	7.45605	7.6101	7.64445	8.69473	9.46395	10.2964
YNL045W	7.29143	7.83249	7.31996	7.13067	6.85499	6.01391	6.10061	5.87574	5.36417
YNL044W	21.1355	23.7909	26.7336	29.5361	30.6241	33.2913	30.2696	30.4538	28.8821
YNL042W	4.39685	3.51897	3.25712	2.958	2.65264	2.42568	3.08853	2.70187	2.74907
YNL041C	4.15938	4.41593	4.36927	4.69557	4.64917	4.47292	4.13188	4.63692	4.43193
YNL040W	7.149	8.22184	8.19813	7.88863	7.11414	6.78693	6.89126	6.79915	6.57841
YNL039W	7.10848	7.39908	7.39886	7.38461	8.36372	8.15154	8.05936	8.63344	8.42099
YNL038W	8.10254	7.30459	7.48246	7.54789	6.23812	7.38888	7.27979	7.67272	9.6091
YNL037C	20.3115	22.1854	27.436	36.2628	56.1285	66.6579	79.4561	77.7017	71.5042
YNL036W	102.005	121.98	115.14	76.6483	51.9968	39.2965	33.5949	23.8914	24.3564
YNL035C	5.6865	5.97942	4.89019	4.93878	5.61874	5.66531	6.45079	6.74644	7.2792
YNL032W	10.4088	9.6529	8.33116	7.44911	6.77533	7.8076	8.43108	8.27548	7.87187
YNL031C	51.3439	58.8512	79.7835	90.3081	98.2181	105.357	104.257	105.411	110.233
YNL030W	35.3981	44.0701	67.8855	84.8597	108.942	130.831	116.832	131.039	132.582
YNL029C	3.72813	3.29786	2.76399	2.91368	3.59965	4.56646	4.71122	5.49459	5.67021
YNL027W	6.13315	6.63192	6.37847	6.11277	6.42736	6.81434	6.52698	6.39455	6.20361
YNL026W	7.6842	7.82424	7.47589	7.62833	8.05687	8.09092	9.8256	8.97425	9.26813
YNL025C	5.67773	5.16676	4.13542	4.20517	3.58584	3.37693	3.64984	3.47846	3.05074
YNL024C	0.961687	1.17231	1.29969	1.41605	1.50241	1.65856	2.02364	2.26135	2.24872
YNL023C	4.33382	4.06388	4.13482	4.07089	4.33579	4.10448	4.05585	4.12414	4.57063
YNL022C	6.11891	6.13721	5.38229	6.2567	7.32503	7.54382	8.31751	7.95609	8.19479
YNL021W	2.74945	2.58872	2.95336	3.60782	4.22922	4.76314	4.98896	5.09981	5.30052
YNL020C	4.37391	4.2806	4.42519	4.32628	4.44121	4.18347	3.95544	4.04923	3.91274
YNL019C	2.35115	2.15235	2.20634	1.87647	1.86296	1.78539	1.66273	1.81673	1.41669
YNL016W	12.7429	14.5678	17.0145	17.5884	20.6496	19.7569	21.7258	22.2074	24.4984
YNL015W	68.421	80.691	87.9795	80.6898	60.8385	58.6839	64.7556	57.0716	44.1964
YNL014W	17.6943	18.5104	13.3558	8.4478	2.76128	0.921069	0.759946	0.701846	0.573569
YNL012W	8.29185	8.39505	6.3488	5.18327	3.73414	3.27624	2.38327	1.46417	1.17103
YNL011C	5.03157	4.54769	4.31532	3.9782	3.86565	3.59771	3.81586	3.84841	3.32953
YNL010W	15.1847	14.6639	14.7558	17.2019	19.1826	20.6315	18.5732	18.8724	20.1686
YNL009W	15.6228	16.0641	12.715	9.48437	6.22525	4.46566	4.2607	1.5377	1.30764
YNL008C	8.10116	7.9019	7.21705	6.64506	6.2952	5.67915	5.27271	5.2701	4.94127
YNL007C	66.28	67.8862	56.5139	45.4227	29.9098	21.6176	21.7431	19.199	20.0329
YNL006W	23.5339	19.0142	13.0478	11.0071	10.2638	9.69482	11.0323	10.6262	10.838
YNL005C	13.6444	13.4449	15.2001	17.5884	21.0861	23.0586	26.6809	26.247	25.3329
YNL004W	11.7275	13.0222	14.3808	15.3773	16.3355	16.5959	16.8627	16.3401	16.2879
YNL003C	7.96308	8.11329	8.27042	8.25235	8.88035	7.99295	8.25803	7.36613	7.40029
YNL002C	14.112	14.6889	16.7694	19.4727	20.8139	22.7963	21.5539	21.779	22.7221
YNL001W	5.53912	5.8468	6.02898	6.82582	6.94604	7.99149	7.86912	7.64399	7.25787
YNR001C	55.8058	53.3749	52.2151	60.4946	86.2988	111.266	138.356	122.639	94.3176
YNR002C	58.3676	50.4482	47.6312	44.234	56.5243	60.6479	49.8219	16.0173	8.25936
YNR003C	7.64443	7.88638	7.3582	7.11994	8.72761	8.48277	7.86439	6.08077	6.99006
YNR004W	4.14173	3.71137	3.4778	3.58283	3.72913	3.5694	3.46105	3.50202	3.21574
YNR006W	8.20881	8.13374	8.48298	7.93113	7.50114	6.90481	7.43861	6.57503	6.74757
YNR007C	14.3893	14.0275	12.9958	10.7679	7.54661	5.67633	5.81372	4.96084	4.56852
YNR008W	3.27879	3.54997	5.03125	5.28326	6.11897	6.06611	6.15942	6.39036	7.0465
YNR009W	2.93005	3.32768	4.72266	5.41848	6.34452	6.63926	6.38854	6.86282	7.93432
YNR010W	7.66936	8.09836	8.25536	9.00558	6.31916	5.78792	4.9635	5.40507	5.02967
YNR011C	3.92401	3.50887	3.32819	3.46604	3.76751	3.80998	3.57592	3.86782	3.89674
YNR012W	3.4143	3.39268	4.0859	4.67105	5.36022	5.95224	6.59202	6.54914	7.20695
YNR013C	5.00653	4.80825	5.21044	5.08887	6.0707	6.03742	6.4875	7.27675	8.10505
YNR014W	2.81162	2.86468	3.30507	2.67869	2.301	2.50458	3.30608	3.27619	4.71905
YNR015W	5.75161	6.25128	6.61127	7.36955	8.94399	9.06619	10.0333	8.19668	8.93031
YNR016C	24.3945	29.2255	24.4334	20.1944	18.082	16.1214	15.8856	17.0164	16.6432
YNR017W	17.7642	18.0799	19.4894	22.7231	28.793	31.9299	37.6604	39.0319	39.193
YNR018W	13.8274	15.9207	17.1421	17.7679	18.7311	18.8786	17.6845	14.9462	14.8952
YNR019W	9.24122	10.1557	11.9056	11.1595	9.40762	7.27038	6.81201	9.70368	12.0848
YNR020C	7.20244	7.34548	8.32637	10.5258	12.5876	14.2069	16.178	16.5441	17.2284
YNR021W	11.9243	13.3757	15.216	16.6951	17.9806	18.7978	17.1032	18.9722	19.1322
YNR022C	16.4184	14.3536	15.4221	18.4873	22.2393	26.5192	33.6728	38.4956	39.4984
YNR023W	5.10581	4.81599	5.08678	5.0116	5.3118	5.43984	5.54807	5.62138	5.97271
YNR024W	9.05194	9.12997	8.89029	9.08016	9.08694	9.15594	9.37967	8.01333	8.8481
YNR026C	5.13314	5.63161	5.9357	6.53633	6.93371	6.7962	6.6749	6.23891	6.44413
YNR027W	4.04287	4.06155	4.55484	4.57875	4.18158	4.23429	5.0077	3.92819	4.46908
YNR028W	10.8975	11.577	10.7806	12.1297	13.1998	13.9716	14.9165	12.8337	12.0849
YNR029C	8.77687	8.45009	7.89057	7.41338	7.79529	7.79744	7.89084	7.26352	7.22814
YNR030W	9.82533	10.2896	11.8063	12.0424	12.0904	12.539	12.155	9.26482	9.41279
YNR031C	2.46861	2.54799	2.81791	3.02529	3.60021	3.52735	3.15791	4.19484	4.17747
YNR032W	6.68736	6.84098	6.76001	6.84993	7.1032	7.07112	6.98226	6.12822	6.3668
YNR032C-A	16.0229	15.372	14.5676	14.0415	12.0862	12.4247	10.5898	9.82617	10.826
YNR033W	5.56928	5.64562	6.26556	6.96244	8.63527	8.84507	9.65351	8.82748	8.60478
YNR034W	10.8019	10.4489	6.89107	5.18617	3.87434	2.84234	2.66209	3.18169	3.03369
YNR034W-A	123.732	116.123	69.4698	41.4805	14.4259	4.94972	5.37589	4.57366	4.46291
YNR035C	17.9924	19.523	20.3112	20.2569	20.3905	19.2207	18.0797	17.6138	18.5252
YNR036C	33.0834	31.7632	35.7238	37.2633	41.0009	43.3053	44.9427	45.6136	45.7742
YNR037C	19.3513	18.082	21.4367	25.321	26.4246	30.4086	32.2065	34.8617	35.7216
YNR038W	3.62965	4.16669	4.45804	5.05055	5.52728	6.34595	6.97799	6.38188	6.5048
YNR039C	6.76168	6.49063	6.30059	5.72325	4.94296	4.42423	4.83618	4.47789	4.7492
YNR040W	5.54406	4.83859	5.84166	6.74953	8.83467	10.5855	12.3213	13.221	14.3026
YNR041C	6.49471	6.05652	6.97936	7.67161	8.76499	9.10272	9.49297	10.484	10.6482
YNR043W	14.6432	17.6291	20.8716	23.4523	26.7914	24.8032	25.8215	23.5947	24.2784
YNR045W	5.00966	5.10081	5.7034	5.94265	7.4154	8.10656	9.2085	8.94249	8.69255
YNR046W	13.5828	13.8107	15.6396	15.9219	19.199	19.5121	20.8792	18.4526	21.6275
YNR047W	3.37415	3.56767	3.8707	3.57456	3.80233	3.70617	3.58103	4.31395	4.11675
YNR048W	5.02015	5.36496	6.59691	6.56669	6.9849	6.42661	6.39539	6.32807	6.19128
YNR049C	10.5558	10.5897	10.2418	9.30843	9.01592	7.77154	6.98213	7.37478	7.28804
YNR050C	21.7123	31.2713	35.9482	44.4065	56.9643	62.9697	60.2917	51.732	57.3525
YNR051C	8.74913	8.86226	10.8512	11.2937	12.6643	13.4762	14.0356	16.7761	16.9507
YNR052C	7.00459	7.84967	9.46206	9.8593	10.7689	10.503	11.0112	10.287	10.514
YNR053C	7.75446	8.55888	9.50745	12.7713	13.7841	15.8026	15.1591	19.4637	20.5265
YNR054C	5.34947	5.98859	5.65512	6.15981	6.83306	7.28537	8.22184	7.46425	8.03031
YNR055C	7.1953	6.58672	6.48475	6.49918	6.72232	6.83052	6.69409	7.16454	6.74844
YNR056C	2.38243	3.31538	4.58593	4.52032	4.11607	3.34845	3.02646	1.55605	1.39013
YNR057C	8.23674	8.33511	8.47164	7.65485	6.54021	6.63872	6.33397	5.01309	5.11171
YNR058W	3.43029	5.00577	6.77529	5.58964	3.92418	3.62294	3.18309	1.91216	1.81443
YNR059W	3.35615	3.23766	3.75448	3.38045	2.5733	2.39665	2.12851	2.57522	2.1674
YNR060W	4.33461	4.16164	2.75301	2.37263	2.44279	2.43139	1.97891	1.63679	1.38081
YNR061C	15.2825	15.3023	13.0385	11.1599	8.37323	7.32748	6.01883	8.65799	9.23877
YNR062C	2.11419	1.98386	1.94214	1.58724	1.66531	2.13411	2.0603	2.60619	2.08395
YNR063W	2.70184	2.09459	1.56638	1.48373	1.38398	1.45219	1.55225	1.27752	0.984713
YNR064C	7.25618	5.6072	3.31259	2.64894	2.21127	1.69493	2.16811	1.3698	1.30794
YJL222W	2.57105	2.37061	2.61607	2.65442	2.94468	2.85028	2.94607	4.31206	4.88661
YNR067C	2.78623	3.0935	6.66265	7.50976	8.7166	10.0756	9.98668	11.3003	12.527
YNR069C	4.07384	5.46547	8.96738	7.73182	3.41705	1.54539	1.41089	1.52678	1.5676
YNR075W	1.80812	2.2384	2.1312	2.57889	2.97178	3.21281	4.07966	4.56966	4.40669
YOL165C	1.16768	1.0712	0.751461	1.31856	1.23894	1.25712	1.53971	1.26701	0.579249
YOL164W	8.30079	7.30666	4.02973	5.04917	5.65342	5.49778	5.89276	5.99452	5.11014
YOL163W	5.4409	4.42083	2.30581	3.05927	4.25425	5.61848	7.81438	6.36138	5.05986
YOL161C	1.41048	1.29767	1.36309	1.56032	1.69653	1.64064	1.94324	2.1559	2.48403
YOL159C-A	5.34564	4.28333	3.12809	3.22668	3.16065	3.49424	3.30408	3.77895	4.18519
YOL159C	13.6089	11.6649	7.76384	7.06709	4.96241	4.65833	4.57769	4.40182	3.89891
YOL158C	4.34776	4.77706	4.62767	4.73885	4.64546	5.00072	5.584	7.04347	7.93973
YOL154W	5.4124	5.99534	6.33892	8.6005	11.0927	18.1372	17.7393	7.34361	5.82381
YOL153C	7.23035	7.36153	6.49836	5.06294	2.90794	1.76956	1.75026	1.80613	1.4934
YOL152W	3.58325	4.13141	4.2879	4.59015	5.54242	5.83873	8.0573	7.99009	4.32421
YOL151W	21.7721	27.9928	24.9923	18.2567	7.06567	2.65539	2.26257	3.04625	3.92559
YOL149W	9.75201	9.6554	9.40717	9.59487	8.76189	9.1416	9.45034	10.0322	11.0986
YOL148C	4.39717	4.73474	5.45377	5.41237	5.78961	5.85801	5.73437	5.66306	5.73045
YOL147C	42.2248	44.3306	37.2012	33.4718	30.118	32.3582	28.5103	12.5748	10.6386
YOL146W	11.3697	10.9596	9.29421	7.83356	7.43947	6.20676	6.67127	5.44778	6.39272
YOL145C	5.15951	5.54262	6.25084	6.79172	7.66056	8.2664	7.93024	8.93964	8.81372
YOL144W	4.04681	4.31386	4.0618	4.31072	5.02502	5.55335	6.3117	5.60895	5.64611
YOL143C	19.8673	22.1298	21.1578	19.8917	18.8926	18.61	18.6721	14.211	14.94
YOL142W	11.5944	12.1774	11.4466	11.551	11.1012	11.8732	11.3226	11.0935	11.4205
YOL141W	0.867486	0.917187	1.15252	1.36717	1.46925	1.48341	1.52531	1.67537	1.99256
YOL140W	7.45798	10.9016	17.8504	18.1651	14.1572	11.5707	10.6573	11.2366	12.1623
YOL139C	38.0209	40.9505	43.5981	46.0252	49.4828	56.117	58.791	58.9234	66.2209
YOL138C	3.00377	2.75738	2.7445	2.71712	3.23973	3.23285	3.11632	3.61235	3.39066
YOL137W	5.03944	5.17516	5.09228	5.54638	6.30375	6.40257	6.64244	6.85659	6.35979
YOL136C	4.67887	5.356	5.07848	5.4173	4.14908	3.23149	3.21306	2.74551	5.02647
YOL135C	7.55785	7.4832	7.00576	7.06898	6.71823	6.42782	6.39996	6.17702	6.25761
YOL133W	12.7756	12.8635	13.4887	12.4213	10.159	8.72076	8.69971	8.37718	10.2017
YOL132W	3.20468	2.28981	1.73215	1.63152	1.90174	1.68626	1.51253	1.408	1.40495
YOL131W	6.36883	4.63226	4.33552	3.07049	0.950369	0.590551	0.573485	0.372757	0.375195
YOL130W	5.07106	5.29335	6.47393	6.42057	6.68675	6.5916	5.96797	6.22611	6.82029
YOL129W	26.8424	28.1764	29.5354	27.0295	21.682	19.8427	18.9605	16.5163	17.3803
YOL128C	4.01889	3.71155	3.22883	3.37248	3.13919	3.50108	2.87501	2.90005	2.82673
YOL127W	107.286	125.422	127.266	144.812	146.137	179.338	146.739	179.507	183.505
YOL126C	47.8605	42.3768	28.4881	24.9554	17.8286	9.44733	9.73326	2.77304	2.15448
YOL125W	5.5106	4.83422	4.87504	5.16281	5.97196	6.61165	6.73945	6.29191	6.55102
YOL124C	3.64167	5.08135	6.41709	7.95484	9.76811	10.0598	10.4285	8.36731	9.31966
YOL123W	17.3985	17.1166	18.0709	16.7711	17.841	18.05	18.046	19.7361	21.4298
YOL122C	9.65958	9.64012	9.43044	8.95919	8.70063	8.88325	10.401	12.3247	12.7089
YOL121C	49.624	54.3473	55.3428	65.6293	69.3704	84.2491	69.142	86.7099	94.9666
YOL120C	79.4608	95.3841	100.279	117.208	127.111	146.556	115.277	148.347	153.752
YOL119C	15.4076	16.1603	18.6489	18.5136	12.8557	9.97287	9.1229	6.00055	6.72039
YOL117W	3.98158	4.08471	3.24142	3.00383	2.65761	2.37619	2.11102	2.35888	1.87725
YOL116W	6.21188	5.82728	5.50724	5.85988	6.63615	6.2289	6.69911	6.0764	5.68988
YOL115W	4.57911	4.6145	4.94233	5.3865	6.4152	6.64043	6.04653	7.44599	7.78111
YOL114C	3.0231	2.54842	2.6298	2.89414	3.45076	3.30918	3.899	3.23701	3.13496
YOL113W	7.66222	8.1356	7.30751	6.37476	5.76732	5.70232	5.50297	6.26131	5.50985
YOL112W	7.8746	7.90294	7.92058	7.58297	7.24041	7.21193	7.68486	7.42461	6.67699
YOL111C	15.408	15.3807	15.7231	13.2351	10.8652	8.92568	9.37739	8.7931	9.16186
YOL110W	11.7612	13.7437	17.3932	13.7181	9.469	6.12779	5.8997	4.58227	4.7593
[truncated: 3,403 more rows]
