# Supplementary material for: Proteome allocations change linearly with the specific growth rate of Saccharomyces cerevisiae under glucose limitation
Source: Nat Commun. 2022 May 20;13:2819. doi: 10.1038/s41467-022-30513-2 (PMC9122918; doi:10.1038/s41467-022-30513-2)
Supplement: Supplementary file 7 — Supplementary Data 4 [file 41467_2022_30513_MOESM7_ESM.xlsx]

## Sheet: Sheet1
AminoAcid	Abbreviation	0.027 h-1	0.044 h-1	0.102 h-1	0.152 h-1	0.214 h-1	0.254 h-1	0.284 h-1	0.334 h-1	0.379 h-1	MolecularWeight
Alanine	Ala	2.02949e+09	2.10818e+09	2.28711e+09	2.45362e+09	1.78341e+09	2.04012e+09	2.11896e+09	2.11362e+09	1.89306e+09	89.1
Arginine	Arg	1.86222e+08	1.93927e+08	2.224e+08	2.42394e+08	1.7796e+08	2.03674e+08	2.07683e+08	2.02778e+08	1.81395e+08	121.2
Asparagine	Asn	1.48879e+09	1.52054e+09	1.59996e+09	1.68554e+09	1.19714e+09	1.35368e+09	1.40413e+09	1.39274e+09	1.2473e+09	133.1
Aspartate	Asp	1.70883e+09	1.74986e+09	1.88865e+09	2.02273e+09	1.4658e+09	1.66957e+09	1.72565e+09	1.71421e+09	1.53135e+09	147.1
Cysteine	Cys	9.63363e+08	9.93141e+08	1.07364e+09	1.14509e+09	8.24137e+08	9.37008e+08	9.67042e+08	9.54022e+08	8.51497e+08	165.2
Glutamate	Glu	1.72552e+09	1.78337e+09	1.92864e+09	2.05926e+09	1.49043e+09	1.69935e+09	1.75174e+09	1.72646e+09	1.5387e+09	75.1
Glutamine	Gln	4.70539e+08	4.86162e+08	5.31323e+08	5.7037e+08	4.13442e+08	4.73621e+08	4.89831e+08	4.85967e+08	4.33585e+08	155.2
Glycine	Gly	1.45477e+09	1.50111e+09	1.63652e+09	1.75784e+09	1.27648e+09	1.45623e+09	1.50011e+09	1.48269e+09	1.32656e+09	131.2
Histidine	His	1.96648e+09	2.01748e+09	2.17364e+09	2.33149e+09	1.68914e+09	1.93557e+09	2.00482e+09	2.0047e+09	1.80053e+09	146.2
Isoleucine	Ile	2.01508e+09	2.08108e+09	2.26444e+09	2.42735e+09	1.75695e+09	2.00617e+09	2.08491e+09	2.06727e+09	1.84238e+09	131.2
Leucine	Leu	4.32336e+08	4.48104e+08	4.97244e+08	5.3713e+08	3.91662e+08	4.48507e+08	4.65175e+08	4.60759e+08	4.12585e+08	149.2
Lysine	Lys	1.13437e+09	1.16375e+09	1.24614e+09	1.31969e+09	9.44979e+08	1.07525e+09	1.11031e+09	1.09803e+09	9.81743e+08	132.1
Methionine	Met	1.06714e+09	1.09782e+09	1.18459e+09	1.26383e+09	9.12096e+08	1.03951e+09	1.07747e+09	1.06896e+09	9.54378e+08	115.1
Phenylalanine	Phe	8.48457e+08	8.73289e+08	9.55251e+08	1.02815e+09	7.47865e+08	8.57097e+08	8.86601e+08	8.80425e+08	7.8759e+08	146.2
Proline	Pro	1.03676e+09	1.07706e+09	1.19914e+09	1.29844e+09	9.5601e+08	1.10539e+09	1.15635e+09	1.16274e+09	1.04686e+09	174.2
Serine	Ser	1.65526e+09	1.70738e+09	1.84407e+09	1.961e+09	1.40939e+09	1.60181e+09	1.65239e+09	1.63301e+09	1.45659e+09	105.1
Threonine	Thr	1.35373e+09	1.40204e+09	1.52708e+09	1.64061e+09	1.19036e+09	1.36036e+09	1.40988e+09	1.39952e+09	1.25068e+09	119.1
Tryptophan	Trp	1.75935e+09	1.82035e+09	1.97201e+09	2.11437e+09	1.52861e+09	1.74907e+09	1.81498e+09	1.81125e+09	1.62368e+09	117.1
Tyrosine	Tyr	2.17896e+08	2.25742e+08	2.4663e+08	2.64251e+08	1.9053e+08	2.17186e+08	2.22675e+08	2.20532e+08	1.9827e+08	204.2
Valine	Val	7.27433e+08	7.51495e+08	8.20057e+08	8.80075e+08	6.34009e+08	7.21198e+08	7.37145e+08	7.25659e+08	6.50429e+08	181.2
	average_MW	128.571	128.535	128.606	128.646	128.664	128.686	128.684	128.712	128.745	128.65
